# Supplementary material for: Proximal and distal spinal neurons innervating multiple synergist and antagonist motor pools
Source: eLife. 2021 Nov 2;10:e70858. doi: 10.7554/eLife.70858 (PMC8631798; doi:10.7554/eLife.70858)
Supplement: Figure 1—figure supplement 4—source data 1. [file elife-70858-fig1-figsupp4-data1.xlsx]

## Sheet: Figure 1
Sample	Part of Spinal Cord	Identity	labelling	Muscles	Medio_Lateral	Dorso_Ventral	Rostro-caudal
170503n6	Lumbar	Premotor	divergent	LGTA	167.424	263.968	-1500
170503n6	Lumbar	Premotor	divergent	LGTA	-267.774	-165.904	-1500
170503n6	Lumbar	Premotor	divergent	LGTA	-3.27731	-81.5367	-1469.7
170503n6	Lumbar	Premotor	divergent	LGTA	-360.78	-405	-1439.39
170503n6	Lumbar	Premotor	divergent	LGTA	366.436	13.7097	-1409.09
170503n6	Lumbar	Premotor	divergent	LGTA	439.324	137.903	-1409.09
170503n6	Lumbar	Premotor	divergent	LGTA	-162.259	-221.521	-1409.09
170503n6	Lumbar	Premotor	divergent	LGTA	357.252	257.377	-1378.79
170503n6	Lumbar	Premotor	divergent	LGTA	-205.515	-219.458	-1378.79
170503n6	Lumbar	Premotor	divergent	LGTA	-278.162	-279.31	-1378.79
170503n6	Lumbar	Premotor	divergent	LGTA	446.875	97.2752	-1348.48
170503n6	Lumbar	Premotor	divergent	LGTA	432.387	15.8311	-1318.18
170503n6	Lumbar	Premotor	divergent	LGTA	467.394	28.496	-1318.18
170503n6	Lumbar	Premotor	divergent	LGTA	227.074	129.024	-1318.18
170503n6	Lumbar	Premotor	divergent	LGTA	160.844	272.296	-1318.18
170503n6	Lumbar	Premotor	divergent	LGTA	279.118	235.687	-1287.88
170503n6	Lumbar	Premotor	divergent	LGTA	345.074	-435.246	-1287.88
170503n6	Lumbar	Premotor	divergent	LGTA	233.772	214.344	-1257.58
170503n6	Lumbar	Premotor	divergent	LGTA	-267.857	106.296	-1257.58
170503n6	Lumbar	Premotor	divergent	LGTA	297.089	185.526	-1227.27
170503n6	Lumbar	Premotor	divergent	LGTA	254.512	248.684	-1227.27
170503n6	Lumbar	Premotor	divergent	LGTA	219.972	141.495	-1196.97
170503n6	Lumbar	Premotor	divergent	LGTA	265.95	171.649	-1196.97
170503n6	Lumbar	Premotor	divergent	LGTA	305.617	187.887	-1196.97
170503n6	Lumbar	Premotor	divergent	LGTA	315.469	213.178	-1166.67
170503n6	Lumbar	Premotor	divergent	LGTA	291.127	96.8504	-1136.36
170503n6	Lumbar	Premotor	divergent	LGTA	305.775	148.819	-1136.36
170503n6	Lumbar	Premotor	divergent	LGTA	255.423	176.378	-1136.36
170503n6	Lumbar	Premotor	divergent	LGTA	362.535	114.961	-1136.36
170503n6	Lumbar	Premotor	divergent	LGTA	469.02	125.635	-1106.06
170503n6	Lumbar	Premotor	divergent	LGTA	471.569	107.36	-1106.06
170503n6	Lumbar	Premotor	divergent	LGTA	212.418	133.249	-1106.06
170503n6	Lumbar	Premotor	divergent	LGTA	236.988	253.435	-1075.76
170503n6	Lumbar	Premotor	divergent	LGTA	263.158	55.1637	-1045.45
170503n6	Lumbar	Premotor	divergent	LGTA	142.105	306.801	-1045.45
170503n6	Lumbar	Premotor	divergent	LGTA	301.754	-418.02	-1045.45
170503n6	Lumbar	Premotor	divergent	LGTA	256.579	52.4422	-1015.15
170503n6	Lumbar	Premotor	divergent	LGTA	347.507	161.954	-1015.15
170503n6	Lumbar	Premotor	divergent	LGTA	81.9252	247.558	-1015.15
170503n6	Lumbar	Premotor	divergent	LGTA	237.624	131.034	-984.848
170503n6	Lumbar	Premotor	divergent	LGTA	-460.811	293.154	-984.848
170503n6	Lumbar	Premotor	divergent	LGTA	398.98	-6.4133	-954.545
170503n6	Lumbar	Premotor	divergent	LGTA	206.777	75.6688	-924.242
170503n6	Lumbar	Premotor	divergent	LGTA	480.083	142.93	-924.242
170503n6	Lumbar	Premotor	divergent	LGTA	462.102	94.7771	-924.242
170503n6	Lumbar	Premotor	divergent	LGTA	-256.029	-253.069	-924.242
170503n6	Lumbar	Premotor	divergent	LGTA	261.575	45.4902	-893.939
170503n6	Lumbar	Premotor	divergent	LGTA	282.571	228.235	-893.939
170503n6	Lumbar	Premotor	divergent	LGTA	414.67	-114.115	-893.939
170503n6	Lumbar	Premotor	divergent	LGTA	-130.787	37.5	-863.636
170503n6	Lumbar	Premotor	divergent	LGTA	523.077	159.894	-863.636
170503n6	Lumbar	Premotor	divergent	LGTA	539.423	98.153	-863.636
170503n6	Lumbar	Premotor	divergent	LGTA	373.077	-13.3257	-863.636
170503n6	Lumbar	Premotor	divergent	LGTA	413.102	246.174	-833.333
170503n6	Lumbar	Premotor	divergent	LGTA	432.681	-77.3438	-833.333
170503n6	Lumbar	Premotor	divergent	LGTA	389.82	-3.99113	-803.03
170503n6	Lumbar	Premotor	divergent	LGTA	372.357	130.769	-772.727
170503n6	Lumbar	Premotor	divergent	LGTA	256.286	82.3077	-772.727
170503n6	Lumbar	Premotor	divergent	LGTA	34.3571	2.30769	-772.727
170503n6	Lumbar	Premotor	divergent	LGTA	-250	-158.232	-772.727
170503n6	Lumbar	Premotor	divergent	LGTA	42.7143	-3.79747	-772.727
170503n6	Lumbar	Premotor	divergent	LGTA	-73.8636	48.7874	-742.424
170503n6	Lumbar	Premotor	divergent	LGTA	172.278	119.843	-742.424
170503n6	Lumbar	Premotor	divergent	LGTA	374.355	108.094	-742.424
170503n6	Lumbar	Premotor	divergent	LGTA	417.192	266.319	-742.424
170503n6	Lumbar	Premotor	divergent	LGTA	-13.7879	-90.9375	-742.424
170503n6	Lumbar	Premotor	divergent	LGTA	250.861	173.031	-712.121
170503n6	Lumbar	Premotor	divergent	LGTA	-69.044	-165.682	-712.121
170503n6	Lumbar	Premotor	divergent	LGTA	292.633	168.194	-681.818
170503n6	Lumbar	Premotor	divergent	LGTA	195.089	58.221	-681.818
170503n6	Lumbar	Premotor	divergent	LGTA	350.273	243.396	-681.818
170503n6	Lumbar	Premotor	divergent	LGTA	188.881	-41.6842	-681.818
170503n6	Lumbar	Premotor	divergent	LGTA	181.749	107.143	-651.515
170503n6	Lumbar	Premotor	divergent	LGTA	313.361	-9.8301	-651.515
170503n6	Lumbar	Premotor	divergent	LGTA	128.156	96.9863	-621.212
170503n6	Lumbar	Premotor	divergent	LGTA	-255.192	-236.228	-621.212
170503n6	Lumbar	Premotor	divergent	LGTA	283.697	206.612	-590.909
170503n6	Lumbar	Premotor	divergent	LGTA	264.465	92.0548	-560.606
170503n6	Lumbar	Premotor	divergent	LGTA	365.786	204.658	-560.606
170503n6	Lumbar	Premotor	divergent	LGTA	165.72	276.164	-560.606
170503n6	Lumbar	Premotor	divergent	LGTA	229.26	129.863	-560.606
170503n6	Lumbar	Premotor	divergent	LGTA	287.378	191.489	-530.303
170503n6	Lumbar	Premotor	divergent	LGTA	261.088	51.0638	-530.303
170503n6	Lumbar	Premotor	divergent	LGTA	414.296	201.702	-530.303
170503n6	Lumbar	Premotor	divergent	LGTA	174.189	235.294	-500
170503n6	Lumbar	Premotor	divergent	LGTA	314.655	65.6381	-469.697
170503n6	Lumbar	Premotor	divergent	LGTA	226.724	238.149	-469.697
170503n6	Lumbar	Premotor	divergent	LGTA	407.759	165.778	-469.697
170503n6	Lumbar	Premotor	divergent	LGTA	-208.333	-288.833	-469.697
170503n6	Lumbar	Premotor	divergent	LGTA	268.966	-33.5106	-469.697
170503n6	Lumbar	Premotor	divergent	LGTA	381.034	-23.9362	-469.697
170503n6	Lumbar	Premotor	divergent	LGTA	138.569	118.455	-439.394
170503n6	Lumbar	Premotor	divergent	LGTA	164.095	94.4206	-439.394
170503n6	Lumbar	Premotor	divergent	LGTA	329.102	138.197	-439.394
170503n6	Lumbar	Premotor	divergent	LGTA	-362.768	-222.078	-439.394
170503n6	Lumbar	Premotor	divergent	LGTA	221.258	24.4382	-409.091
170503n6	Lumbar	Premotor	divergent	LGTA	285.828	128.09	-409.091
170503n6	Lumbar	Premotor	divergent	LGTA	308.212	158.427	-409.091
170503n6	Lumbar	Premotor	divergent	LGTA	264.391	45.8874	-378.788
170503n6	Lumbar	Premotor	divergent	LGTA	266.3	96.9697	-378.788
170503n6	Lumbar	Premotor	divergent	LGTA	279.662	131.602	-378.788
170503n6	Lumbar	Premotor	divergent	LGTA	143.172	191.342	-378.788
170503n6	Lumbar	Premotor	divergent	LGTA	155.58	201.732	-378.788
170503n6	Lumbar	Premotor	divergent	LGTA	442.878	206.926	-378.788
170503n6	Lumbar	Premotor	divergent	LGTA	-345.455	-247.5	-378.788
170503n6	Lumbar	Premotor	divergent	LGTA	143.481	109.483	-348.485
170503n6	Lumbar	Premotor	divergent	LGTA	436.222	190.517	-348.485
170503n6	Lumbar	Premotor	divergent	LGTA	225.333	100	-348.485
170503n6	Lumbar	Premotor	divergent	LGTA	476.985	26.284	-318.182
170503n6	Lumbar	Premotor	divergent	LGTA	138.603	120.544	-318.182
170503n6	Lumbar	Premotor	divergent	LGTA	369.926	-63	-318.182
170503n6	Lumbar	Premotor	divergent	LGTA	365.438	105.495	-287.879
170503n6	Lumbar	Premotor	divergent	LGTA	15.9754	-90.5325	-287.879
170503n6	Lumbar	Premotor	divergent	LGTA	522.197	-88.7574	-287.879
170503n6	Lumbar	Premotor	divergent	LGTA	46.9278	-99.4083	-287.879
170503n6	Lumbar	Premotor	divergent	LGTA	220.889	195.495	-257.576
170503n6	Lumbar	Premotor	divergent	LGTA	392.692	244.144	-257.576
170503n6	Lumbar	Premotor	divergent	LGTA	478.989	317.117	-257.576
170503n6	Lumbar	Premotor	divergent	LGTA	-240.235	-196.023	-257.576
170503n6	Lumbar	Premotor	divergent	LGTA	-163.906	-154.261	-257.576
170503n6	Lumbar	Premotor	divergent	LGTA	-481.912	288.584	-227.273
170503n6	Lumbar	Premotor	divergent	LGTA	195	239.13	-227.273
170503n6	Lumbar	Premotor	divergent	LGTA	364.426	120	-227.273
170503n6	Lumbar	Premotor	divergent	LGTA	687.295	202.609	-227.273
170503n6	Lumbar	Premotor	divergent	LGTA	-236.933	-308.842	-227.273
170503n6	Lumbar	Premotor	divergent	LGTA	255.738	-12.4769	-227.273
170503n6	Lumbar	Premotor	divergent	LGTA	-331.954	-310.758	-196.97
170503n6	Lumbar	Premotor	divergent	LGTA	-388.743	112.141	-166.667
170503n6	Lumbar	Premotor	divergent	LGTA	284.153	89.7281	-136.364
170503n6	Lumbar	Premotor	divergent	LGTA	196.243	137.764	-136.364
170503n6	Lumbar	Premotor	divergent	LGTA	317.008	193.958	-136.364
170503n6	Lumbar	Premotor	divergent	LGTA	-244.414	-224.085	-136.364
170503n6	Lumbar	Premotor	divergent	LGTA	-157.629	-178.354	-136.364
170503n6	Lumbar	Premotor	divergent	LGTA	-508.659	29.5964	-106.061
170503n6	Lumbar	Premotor	divergent	LGTA	169.523	253.313	-106.061
170503n6	Lumbar	Premotor	divergent	LGTA	326.453	154.391	-106.061
170503n6	Lumbar	Premotor	divergent	LGTA	-387.139	175.953	-75.7576
170503n6	Lumbar	Premotor	divergent	LGTA	1.90896	73.0827	-75.7576
170503n6	Lumbar	Premotor	divergent	LGTA	20.9985	24.3609	-75.7576
170503n6	Lumbar	Premotor	divergent	LGTA	-137.689	-24.1736	-75.7576
170503n6	Lumbar	Premotor	divergent	LGTA	-273.59	-291.942	-75.7576
170503n6	Lumbar	Premotor	divergent	LGTA	333.962	33.0781	-45.4545
170503n6	Lumbar	Premotor	divergent	LGTA	466.038	330.781	-45.4545
170503n6	Lumbar	Premotor	divergent	LGTA	173.585	195.712	-45.4545
170503n6	Lumbar	Premotor	divergent	LGTA	234.906	-240.139	-45.4545
170503n6	Lumbar	Premotor	divergent	LGTA	102.885	21.0526	-15.1515
170503n6	Lumbar	Premotor	divergent	LGTA	369.231	0.956938	-15.1515
170503n6	Lumbar	Premotor	divergent	LGTA	475	49.7608	-15.1515
170503n6	Lumbar	Premotor	divergent	LGTA	6.73077	-105.882	-15.1515
170503n6	Lumbar	Premotor	divergent	LGTA	472.115	-131.373	-15.1515
170503n6	Lumbar	Premotor	divergent	LGTA	504.377	25.966	15.1515
170503n6	Lumbar	Premotor	divergent	LGTA	483.16	298.609	15.1515
170503n6	Lumbar	Premotor	divergent	LGTA	514.985	114.992	15.1515
170503n6	Lumbar	Premotor	divergent	LGTA	255.564	269.861	15.1515
170503n6	Lumbar	Premotor	divergent	LGTA	489.911	117.774	15.1515
170503n6	Lumbar	Premotor	divergent	LGTA	-275.283	206.364	15.1515
170503n6	Lumbar	Premotor	divergent	LGTA	401.187	232.767	15.1515
170503n6	Lumbar	Premotor	divergent	LGTA	-255.028	-284	15.1515
170503n6	Lumbar	Premotor	divergent	LGTA	178.412	-68.8578	15.1515
170503n6	Lumbar	Premotor	divergent	LGTA	205.317	101.422	45.4545
170503n6	Lumbar	Premotor	divergent	LGTA	461.19	205.687	45.4545
170503n6	Lumbar	Premotor	divergent	LGTA	441.587	133.649	45.4545
170503n6	Lumbar	Premotor	divergent	LGTA	293.016	146.919	45.4545
170503n6	Lumbar	Premotor	divergent	LGTA	0	-99.4186	45.4545
170503n6	Lumbar	Premotor	divergent	LGTA	518.189	122.542	75.7576
170503n6	Lumbar	Premotor	divergent	LGTA	118.731	173.374	75.7576
170503n6	Lumbar	Premotor	divergent	LGTA	493.034	186.082	75.7576
170503n6	Lumbar	Premotor	divergent	LGTA	378.328	229.652	75.7576
170503n6	Lumbar	Premotor	divergent	LGTA	364.241	-39.9194	75.7576
170503n6	Lumbar	Premotor	divergent	LGTA	153.947	-272.177	75.7576
170503n6	Lumbar	Premotor	divergent	LGTA	-195	-252.714	106.061
170503n6	Lumbar	Premotor	divergent	LGTA	-325.844	-201.044	106.061
170503n6	Lumbar	Premotor	divergent	LGTA	-200.909	-157.829	106.061
170503n6	Lumbar	Premotor	divergent	LGTA	-314.87	59.9049	106.061
170503n6	Lumbar	Premotor	divergent	LGTA	337.574	152.381	106.061
170503n6	Lumbar	Premotor	divergent	LGTA	391.741	196.19	106.061
170503n6	Lumbar	Premotor	divergent	LGTA	427.53	249.524	106.061
170503n6	Lumbar	Premotor	divergent	LGTA	397.222	209.955	136.364
170503n6	Lumbar	Premotor	divergent	LGTA	257.529	97.7376	136.364
170503n6	Lumbar	Premotor	divergent	LGTA	-304.748	-39.9577	166.667
170503n6	Lumbar	Premotor	divergent	LGTA	74.1406	86.1027	166.667
170503n6	Lumbar	Premotor	divergent	LGTA	362.578	216.616	166.667
170503n6	Lumbar	Premotor	divergent	LGTA	430.202	343.769	196.97
170503n6	Lumbar	Premotor	divergent	LGTA	311.879	248.875	227.273
170503n6	Lumbar	Premotor	divergent	LGTA	296.739	8.68167	227.273
170503n6	Lumbar	Premotor	divergent	LGTA	-158.676	-256.542	257.576
170503n6	Lumbar	Premotor	divergent	LGTA	409.327	-280	257.576
170503n6	Lumbar	Premotor	divergent	LGTA	330.014	54.0098	257.576
170503n6	Lumbar	Premotor	divergent	LGTA	333.661	93.2897	257.576
170503n6	Lumbar	Premotor	divergent	LGTA	87.1817	30.9179	287.879
170503n6	Lumbar	Premotor	divergent	LGTA	455.772	178.744	287.879
170503n6	Lumbar	Premotor	divergent	LGTA	296.417	288.963	318.182
170503n6	Lumbar	Premotor	divergent	LGTA	454.153	327.09	318.182
170503n6	Lumbar	Premotor	divergent	LGTA	562.938	-23.1263	348.485
170503n6	Lumbar	Premotor	divergent	LGTA	-207.03	-263.694	348.485
170503n6	Lumbar	Premotor	divergent	LGTA	154.338	125.559	348.485
170503n6	Lumbar	Premotor	divergent	LGTA	486.758	165.815	348.485
170503n6	Lumbar	Premotor	divergent	LGTA	197.869	183.067	348.485
170503n6	Lumbar	Premotor	divergent	LGTA	195.89	173.482	348.485
170503n6	Lumbar	Premotor	divergent	LGTA	-82.5077	-159.519	378.788
170503n6	Lumbar	Premotor	divergent	LGTA	-205.263	-290.481	378.788
170503n6	Lumbar	Premotor	divergent	LGTA	546.843	20.339	378.788
170503n6	Lumbar	Premotor	divergent	LGTA	450.341	224.653	378.788
170503n6	Lumbar	Premotor	divergent	LGTA	245.137	103.544	378.788
170503n6	Lumbar	Premotor	divergent	LGTA	-70.4334	-200.835	409.091
170503n6	Lumbar	Premotor	divergent	LGTA	611.367	-209.501	409.091
170503n6	Lumbar	Premotor	divergent	LGTA	256.909	-29.9287	409.091
170503n6	Lumbar	Premotor	divergent	LGTA	85.9584	-9.61995	409.091
170503n6	Lumbar	Premotor	divergent	LGTA	440.416	164.356	409.091
170503n6	Lumbar	Premotor	divergent	LGTA	371.842	187.129	409.091
170503n6	Lumbar	Premotor	divergent	LGTA	667.158	-57.2727	439.394
170503n6	Lumbar	Premotor	divergent	LGTA	213.975	286	439.394
170503n6	Lumbar	Premotor	divergent	LGTA	232.143	284	439.394
170503n6	Lumbar	Premotor	divergent	LGTA	318.944	202	439.394
170503n6	Lumbar	Premotor	divergent	LGTA	167.547	144	439.394
170503n6	Lumbar	Premotor	divergent	LGTA	-162.003	-237.617	469.697
170503n6	Lumbar	Premotor	divergent	LGTA	78.6047	-2.01794	469.697
170503n6	Lumbar	Premotor	divergent	LGTA	71.5504	107	469.697
170503n6	Lumbar	Premotor	divergent	LGTA	344.651	140	469.697
170503n6	Lumbar	Premotor	divergent	LGTA	397.054	222	469.697
170503n6	Lumbar	Premotor	divergent	LGTA	626.898	-28.2609	500
170503n6	Lumbar	Premotor	divergent	LGTA	584.895	49.2147	500
170503n6	Lumbar	Premotor	divergent	LGTA	468.605	367.652	530.303
170503n6	Lumbar	Premotor	divergent	LGTA	363.87	195.023	530.303
170503n6	Lumbar	Premotor	divergent	LGTA	-177.188	-173.342	560.606
170503n6	Lumbar	Premotor	divergent	LGTA	-140.818	-260.587	560.606
170503n6	Lumbar	Premotor	divergent	LGTA	143.082	57.5342	560.606
170503n6	Lumbar	Premotor	divergent	LGTA	370.991	263.927	560.606
170503n6	Lumbar	Premotor	divergent	LGTA	293.318	41.0959	560.606
170503n6	Lumbar	Premotor	divergent	LGTA	344.418	124.201	560.606
170503n6	Lumbar	Premotor	divergent	LGTA	583.534	-174.194	590.909
170503n6	Lumbar	Premotor	divergent	LGTA	-159.098	-339.919	590.909
170503n6	Lumbar	Premotor	divergent	LGTA	476.992	-298.79	590.909
170503n6	Lumbar	Premotor	divergent	LGTA	138.797	234.423	590.909
170503n6	Lumbar	Premotor	divergent	LGTA	381.203	68.1583	590.909
170503n6	Lumbar	Premotor	divergent	LGTA	321.073	13.1455	621.212
170503n6	Lumbar	Premotor	divergent	LGTA	366.239	228.169	621.212
170503n6	Lumbar	Premotor	divergent	LGTA	-126.568	-287.732	651.515
170503n6	Lumbar	Premotor	divergent	LGTA	-253.135	-229.182	651.515
170503n6	Lumbar	Premotor	divergent	LGTA	562.24	22.5641	651.515
170503n6	Lumbar	Premotor	divergent	LGTA	222.774	124.103	651.515
170503n6	Lumbar	Premotor	divergent	LGTA	-197.063	-237.351	681.818
170503n6	Lumbar	Premotor	divergent	LGTA	46.3596	73.9599	681.818
170503n6	Lumbar	Premotor	divergent	LGTA	161.293	129.43	681.818
170503n6	Lumbar	Premotor	divergent	LGTA	168.053	34.2065	681.818
170503n6	Lumbar	Premotor	divergent	LGTA	-222.799	-252.857	712.121
170503n6	Lumbar	Premotor	divergent	LGTA	294.234	113.154	712.121
170503n6	Lumbar	Premotor	divergent	LGTA	374.785	150.238	712.121
170503n6	Lumbar	Premotor	divergent	LGTA	-135.67	-167.967	742.424
170503n6	Lumbar	Premotor	divergent	LGTA	393.662	254.268	742.424
170503n6	Lumbar	Premotor	divergent	LGTA	-112.383	267.528	742.424
170503n6	Lumbar	Premotor	divergent	LGTA	388.249	62.8659	772.727
170503n6	Lumbar	Premotor	divergent	LGTA	546.856	28.6595	772.727
170503n6	Lumbar	Premotor	divergent	LGTA	54.491	28.6595	772.727
170503n6	Lumbar	Premotor	divergent	LGTA	557.271	-14.7541	803.03
170503n6	Lumbar	Premotor	divergent	LGTA	225.069	248.142	803.03
170503n6	Lumbar	Premotor	divergent	LGTA	-224.453	-231.915	833.333
170503n6	Lumbar	Premotor	divergent	LGTA	-270.156	-282.979	833.333
170503n6	Lumbar	Premotor	divergent	LGTA	518.627	-88.7019	833.333
170503n6	Lumbar	Premotor	divergent	LGTA	364.706	139.713	833.333
170503n6	Lumbar	Premotor	divergent	LGTA	535.356	-255.118	863.636
170503n6	Lumbar	Premotor	divergent	LGTA	-196.201	-143.396	863.636
170503n6	Lumbar	Premotor	divergent	LGTA	-260.267	-267.925	863.636
170503n6	Lumbar	Premotor	divergent	LGTA	207.201	224.232	863.636
170503n6	Lumbar	Premotor	divergent	LGTA	318.689	191.468	863.636
170503n6	Lumbar	Premotor	divergent	LGTA	-124.388	-183.817	893.939
170503n6	Lumbar	Premotor	divergent	LGTA	83.3333	249.618	893.939
170503n6	Lumbar	Premotor	divergent	LGTA	405.556	264.504	893.939
170503n6	Lumbar	Premotor	divergent	LGTA	491.111	45.8015	893.939
170503n6	Lumbar	Premotor	divergent	LGTA	242.222	95.0382	893.939
170503n6	Lumbar	Premotor	divergent	LGTA	461.162	-182.673	924.242
170503n6	Lumbar	Premotor	divergent	LGTA	424.388	262.633	924.242
170503n6	Lumbar	Premotor	divergent	LGTA	211.697	282.918	924.242
170503n6	Lumbar	Premotor	divergent	LGTA	219.648	29.8932	924.242
170503n6	Lumbar	Premotor	divergent	LGTA	469.113	4.27046	924.242
170503n6	Lumbar	Premotor	divergent	LGTA	320.652	35.8209	954.545
170503n6	Lumbar	Premotor	divergent	LGTA	586.957	314.552	954.545
170503n6	Lumbar	Premotor	divergent	LGTA	419.565	326.866	954.545
170503n6	Lumbar	Premotor	divergent	LGTA	546.517	-166.866	984.848
170503n6	Lumbar	Premotor	divergent	LGTA	543.284	-51.6746	984.848
170503n6	Lumbar	Premotor	divergent	LGTA	391.294	-330.502	984.848
170503n6	Lumbar	Premotor	divergent	LGTA	-215.61	-210.687	984.848
170503n6	Lumbar	Premotor	divergent	LGTA	315.837	117.703	984.848
170503n6	Lumbar	Premotor	divergent	LGTA	389.138	171.292	984.848
170503n6	Lumbar	Premotor	divergent	LGTA	-194.046	-229.412	1015.15
170503n6	Lumbar	Premotor	divergent	LGTA	594.55	-23.2759	1015.15
170503n6	Lumbar	Premotor	divergent	LGTA	303.949	255.592	1015.15
170503n6	Lumbar	Premotor	divergent	LGTA	224.882	149.013	1015.15
170503n6	Lumbar	Premotor	divergent	LGTA	-263.514	-241.875	1045.45
170503n6	Lumbar	Premotor	divergent	LGTA	471.844	198.233	1045.45
170503n6	Lumbar	Premotor	divergent	LGTA	-176.6	-166.525	1075.76
170503n6	Lumbar	Premotor	divergent	LGTA	-444.737	-12.7119	1075.76
170503n6	Lumbar	Premotor	divergent	LGTA	-233.001	-245.339	1075.76
170503n6	Lumbar	Premotor	divergent	LGTA	264.522	79.6875	1075.76
170503n6	Lumbar	Premotor	divergent	LGTA	370.783	78.5156	1075.76
170503n6	Lumbar	Premotor	divergent	LGTA	457.761	-114.94	1106.06
170503n6	Lumbar	Premotor	divergent	LGTA	-256.522	-288.789	1106.06
170503n6	Lumbar	Premotor	divergent	LGTA	-371.739	-99.7423	1106.06
170503n6	Lumbar	Premotor	divergent	LGTA	332.435	175.844	1106.06
170503n6	Lumbar	Premotor	divergent	LGTA	323.938	193.961	1106.06
170503n6	Lumbar	Premotor	divergent	LGTA	308.007	214.21	1106.06
170503n6	Lumbar	Premotor	divergent	LGTA	181.618	215.275	1106.06
170503n6	Lumbar	Premotor	divergent	LGTA	391.816	-140.418	1136.36
170503n6	Lumbar	Premotor	divergent	LGTA	391.816	-150.369	1136.36
170503n6	Lumbar	Premotor	divergent	LGTA	316.567	-49.7543	1136.36
170503n6	Lumbar	Premotor	divergent	LGTA	384.032	36.4865	1136.36
170503n6	Lumbar	Premotor	divergent	LGTA	137.525	173.311	1136.36
170503n6	Lumbar	Premotor	divergent	LGTA	156.986	205.743	1136.36
170503n6	Lumbar	Premotor	divergent	LGTA	215.369	222.973	1136.36
170503n6	Lumbar	Premotor	divergent	LGTA	290.619	280.743	1136.36
170503n6	Lumbar	Premotor	divergent	LGTA	77.8443	9.12162	1136.36
170503n6	Lumbar	Premotor	divergent	LGTA	-451.02	-217.699	1166.67
170503n6	Lumbar	Premotor	divergent	LGTA	435.343	-20.7524	1166.67
170503n6	Lumbar	Premotor	divergent	LGTA	596.939	-349.515	1166.67
170503n6	Lumbar	Premotor	divergent	LGTA	320.779	191.16	1166.67
170503n6	Lumbar	Premotor	divergent	LGTA	482.749	330.216	1196.97
170503n6	Lumbar	Premotor	divergent	LGTA	311.696	180.216	1196.97
170503n6	Lumbar	Premotor	divergent	LGTA	305.994	401.439	1196.97
170503n6	Lumbar	Premotor	divergent	LGTA	325	410.072	1196.97
170503n6	Lumbar	Premotor	divergent	LGTA	433.333	-125.357	1227.27
170503n6	Lumbar	Premotor	divergent	LGTA	640.152	-39.6429	1227.27
170503n6	Lumbar	Premotor	divergent	LGTA	299.832	437.324	1227.27
170503n6	Lumbar	Premotor	divergent	LGTA	335.943	211.268	1227.27
170503n6	Lumbar	Premotor	divergent	LGTA	353.451	192.254	1227.27
170503n6	Lumbar	Premotor	divergent	LGTA	-196.282	-156.423	1257.58
170503n6	Lumbar	Premotor	divergent	LGTA	-180.501	-233.501	1257.58
170503n6	Lumbar	Premotor	divergent	LGTA	281.535	-33.4711	1257.58
170503n6	Lumbar	Premotor	divergent	LGTA	133.359	55.0173	1257.58
170503n6	Lumbar	Premotor	divergent	LGTA	313.146	62.2837	1257.58
170503n6	Lumbar	Premotor	divergent	LGTA	617.5	-197.589	1287.88
170503n6	Lumbar	Premotor	divergent	LGTA	328.939	179.429	1287.88
170503n6	Lumbar	Premotor	divergent	LGTA	242.734	-238.958	1318.18
170503n6	Lumbar	Premotor	divergent	LGTA	275.234	216.341	1318.18
170503n6	Lumbar	Premotor	divergent	LGTA	491.562	33.0373	1318.18
170503n6	Lumbar	Premotor	divergent	LGTA	-254.978	-225	1348.48
170503n6	Lumbar	Premotor	divergent	LGTA	621.37	-168.031	1348.48
170503n6	Lumbar	Premotor	divergent	LGTA	396.574	291.837	1348.48
170503n6	Lumbar	Premotor	divergent	LGTA	341	-89.2663	1378.79
170503n6	Lumbar	Premotor	divergent	LGTA	464	-420.652	1378.79
170503n6	Lumbar	Premotor	divergent	LGTA	558	59.1241	1378.79
170503n6	Lumbar	Premotor	divergent	LGTA	435	157.664	1378.79
170503n6	Lumbar	Premotor	divergent	LGTA	352.128	-121.108	1409.09
170503n6	Lumbar	Premotor	divergent	LGTA	442.553	-28.496	1409.09
170503n6	Lumbar	Premotor	divergent	LGTA	268.085	295.082	1409.09
170503n6	Lumbar	Premotor	divergent	LGTA	295.55	-41.0188	1439.39
170503n6	Lumbar	Premotor	divergent	LGTA	102.023	78.7234	1439.39
170503n6	Lumbar	Premotor	divergent	LGTA	564.371	-132.692	1469.7
170503n6	Lumbar	Premotor	divergent	LGTA	270.509	151.351	1469.7
170503n6	Lumbar	Premotor	divergent	LGTA	540.84	-216.456	1500
170503n6	Lumbar	Premotor	divergent	LGTA	558.702	-213.038	1500
170503n6	Lumbar	Premotor	divergent	LGTA	552.748	-17.0886	1500
170508n7	Lumbar	Premotor	divergent	LGMG	-214.386	-229.306	-1500
170508n7	Lumbar	Premotor	divergent	LGMG	-176.754	-241.148	-1500
170508n7	Lumbar	Premotor	divergent	LGMG	-372.295	277.759	-1467.74
170508n7	Lumbar	Premotor	divergent	LGMG	506.693	-279.73	-1403.23
170508n7	Lumbar	Premotor	divergent	LGMG	373.019	48.9185	-1370.97
170508n7	Lumbar	Premotor	divergent	LGMG	307.485	150.502	-1338.71
170508n7	Lumbar	Premotor	divergent	LGMG	474.85	-193.02	-1338.71
170508n7	Lumbar	Premotor	divergent	LGMG	366.805	-51.5854	-1306.45
170508n7	Lumbar	Premotor	divergent	LGMG	306.12	214.145	-1306.45
170508n7	Lumbar	Premotor	divergent	LGMG	281.846	203.289	-1306.45
170508n7	Lumbar	Premotor	divergent	LGMG	-196.809	-177.857	-1274.19
170508n7	Lumbar	Premotor	divergent	LGMG	-218.085	-205.714	-1274.19
170508n7	Lumbar	Premotor	divergent	LGMG	-208.511	-228.214	-1274.19
170508n7	Lumbar	Premotor	divergent	LGMG	-205.44	-259.06	-1241.94
170508n7	Lumbar	Premotor	divergent	LGMG	357.06	104.924	-1241.94
170508n7	Lumbar	Premotor	divergent	LGMG	357.042	-246.477	-1209.68
170508n7	Lumbar	Premotor	divergent	LGMG	387.123	-240.341	-1209.68
170508n7	Lumbar	Premotor	divergent	LGMG	166.097	53.0612	-1209.68
170508n7	Lumbar	Premotor	divergent	LGMG	-370.227	-329.922	-1177.42
170508n7	Lumbar	Premotor	divergent	LGMG	-159.871	-283.29	-1177.42
170508n7	Lumbar	Premotor	divergent	LGMG	486.519	-109.432	-1145.16
170508n7	Lumbar	Premotor	divergent	LGMG	390	209.124	-1112.9
170508n7	Lumbar	Premotor	divergent	LGMG	-305.243	-365.625	-1112.9
170508n7	Lumbar	Premotor	divergent	LGMG	-213.374	-254.207	-1112.9
170508n7	Lumbar	Premotor	divergent	LGMG	-199.544	-197.957	-1112.9
170508n7	Lumbar	Premotor	divergent	LGMG	350	216.799	-1080.65
170508n7	Lumbar	Premotor	divergent	LGMG	341.313	84.7059	-1048.39
170508n7	Lumbar	Premotor	divergent	LGMG	-180.802	-203.294	-1016.13
170508n7	Lumbar	Premotor	divergent	LGMG	-160.836	-190.588	-1016.13
170508n7	Lumbar	Premotor	divergent	LGMG	-276.195	-247.765	-1016.13
170508n7	Lumbar	Premotor	divergent	LGMG	334.924	164.924	-1016.13
170508n7	Lumbar	Premotor	divergent	LGMG	432.48	-45.9397	-983.871
170508n7	Lumbar	Premotor	divergent	LGMG	395.374	-44.8956	-983.871
170508n7	Lumbar	Premotor	divergent	LGMG	249.508	6.13288	-983.871
170508n7	Lumbar	Premotor	divergent	LGMG	-119.132	-63.7339	-951.613
170508n7	Lumbar	Premotor	divergent	LGMG	332.738	29.5918	-951.613
170508n7	Lumbar	Premotor	divergent	LGMG	477.183	201.02	-951.613
170508n7	Lumbar	Premotor	divergent	LGMG	483.631	19.3878	-951.613
170508n7	Lumbar	Premotor	divergent	LGMG	475.893	-135.301	-951.613
170508n7	Lumbar	Premotor	divergent	LGMG	370.139	-416.927	-951.613
170508n7	Lumbar	Premotor	divergent	LGMG	257.692	48.8964	-919.355
170508n7	Lumbar	Premotor	divergent	LGMG	430.769	156.876	-919.355
170508n7	Lumbar	Premotor	divergent	LGMG	-344.18	-261.652	-919.355
170508n7	Lumbar	Premotor	divergent	LGMG	425.641	179.287	-919.355
170508n7	Lumbar	Premotor	divergent	LGMG	337.179	85.5688	-919.355
170508n7	Lumbar	Premotor	divergent	LGMG	469.727	-294.479	-887.097
170508n7	Lumbar	Premotor	divergent	LGMG	111.719	172.487	-887.097
170508n7	Lumbar	Premotor	divergent	LGMG	411.667	-142.157	-854.839
170508n7	Lumbar	Premotor	divergent	LGMG	277.843	75.6303	-854.839
170508n7	Lumbar	Premotor	divergent	LGMG	-209.643	-102.401	-854.839
170508n7	Lumbar	Premotor	divergent	LGMG	-85.3323	-94.8852	-854.839
170508n7	Lumbar	Premotor	divergent	LGMG	-239.141	-231.106	-854.839
170508n7	Lumbar	Premotor	divergent	LGMG	-214.911	-226.409	-854.839
170508n7	Lumbar	Premotor	divergent	LGMG	334.429	166.107	-822.581
170508n7	Lumbar	Premotor	divergent	LGMG	412.379	245.638	-822.581
170508n7	Lumbar	Premotor	divergent	LGMG	-358.583	-214.105	-790.323
170508n7	Lumbar	Premotor	divergent	LGMG	294.389	182.609	-790.323
170508n7	Lumbar	Premotor	divergent	LGMG	278.758	42.1405	-790.323
170508n7	Lumbar	Premotor	divergent	LGMG	453.321	282.594	-758.065
170508n7	Lumbar	Premotor	divergent	LGMG	545.951	28.6184	-725.806
170508n7	Lumbar	Premotor	divergent	LGMG	-275.899	-242.872	-725.806
170508n7	Lumbar	Premotor	divergent	LGMG	12.2411	137.171	-725.806
170508n7	Lumbar	Premotor	divergent	LGMG	274.2	183.553	-725.806
170508n7	Lumbar	Premotor	divergent	LGMG	445.678	-265.042	-693.548
170508n7	Lumbar	Premotor	divergent	LGMG	406.09	202.01	-693.548
170508n7	Lumbar	Premotor	divergent	LGMG	513.465	230.609	-661.29
170508n7	Lumbar	Premotor	divergent	LGMG	-148.345	-132.414	-661.29
170508n7	Lumbar	Premotor	divergent	LGMG	167.351	85.7143	-596.774
170508n7	Lumbar	Premotor	divergent	LGMG	270.429	179.221	-596.774
170508n7	Lumbar	Premotor	divergent	LGMG	313.752	3.97351	-564.516
170508n7	Lumbar	Premotor	divergent	LGMG	323.224	-14.7844	-564.516
170508n7	Lumbar	Premotor	divergent	LGMG	274.385	46.519	-532.258
170508n7	Lumbar	Premotor	divergent	LGMG	51.9467	0	-532.258
170508n7	Lumbar	Premotor	divergent	LGMG	506.148	-43.5484	-532.258
170508n7	Lumbar	Premotor	divergent	LGMG	-60.9375	-120.349	-532.258
170508n7	Lumbar	Premotor	divergent	LGMG	519.467	88.2911	-532.258
170508n7	Lumbar	Premotor	divergent	LGMG	-269.123	-252.532	-500
170508n7	Lumbar	Premotor	divergent	LGMG	585.967	82.3529	-500
170508n7	Lumbar	Premotor	divergent	LGMG	338.29	179.412	-500
170508n7	Lumbar	Premotor	divergent	LGMG	-326.757	65.8784	-467.742
170508n7	Lumbar	Premotor	divergent	LGMG	-190.901	-200.104	-467.742
170508n7	Lumbar	Premotor	divergent	LGMG	540.177	-424.442	-467.742
170508n7	Lumbar	Premotor	divergent	LGMG	390.258	90.5844	-435.484
170508n7	Lumbar	Premotor	divergent	LGMG	414.811	98.3766	-435.484
170508n7	Lumbar	Premotor	divergent	LGMG	-254.878	-292.277	-435.484
170508n7	Lumbar	Premotor	divergent	LGMG	-346.341	-4.45545	-435.484
170508n7	Lumbar	Premotor	divergent	LGMG	249.088	66.7742	-403.226
170508n7	Lumbar	Premotor	divergent	LGMG	531.387	186.774	-403.226
170508n7	Lumbar	Premotor	divergent	LGMG	321.442	0.967742	-403.226
170508n7	Lumbar	Premotor	divergent	LGMG	-173.738	-195.768	-403.226
170508n7	Lumbar	Premotor	divergent	LGMG	457.64	-376.931	-370.968
170508n7	Lumbar	Premotor	divergent	LGMG	403.578	146.535	-370.968
170508n7	Lumbar	Premotor	divergent	LGMG	514.217	145.545	-370.968
170508n7	Lumbar	Premotor	divergent	LGMG	291.683	161.386	-370.968
170508n7	Lumbar	Premotor	divergent	LGMG	284.139	20.7921	-370.968
170508n7	Lumbar	Premotor	divergent	LGMG	-91.3321	-166.028	-370.968
170508n7	Lumbar	Premotor	divergent	LGMG	213.729	220.632	-338.71
170508n7	Lumbar	Premotor	divergent	LGMG	285.339	237.604	-338.71
170508n7	Lumbar	Premotor	divergent	LGMG	244.576	225.624	-338.71
170508n7	Lumbar	Premotor	divergent	LGMG	225.434	194.435	-274.194
170508n7	Lumbar	Premotor	divergent	LGMG	514.74	108.02	-274.194
170508n7	Lumbar	Premotor	divergent	LGMG	220.63	75.5034	-241.935
170508n7	Lumbar	Premotor	divergent	LGMG	513.923	301.007	-241.935
170508n7	Lumbar	Premotor	divergent	LGMG	428.049	-66.5493	-241.935
170508n7	Lumbar	Premotor	divergent	LGMG	435.976	150	-241.935
170508n7	Lumbar	Premotor	divergent	LGMG	459.756	158.054	-241.935
170508n7	Lumbar	Premotor	divergent	LGMG	375.203	-199.648	-241.935
170508n7	Lumbar	Premotor	divergent	LGMG	-246.25	-290.53	-241.935
170508n7	Lumbar	Premotor	divergent	LGMG	318.285	-101.395	-209.677
170508n7	Lumbar	Premotor	divergent	LGMG	408.264	77.0548	-209.677
170508n7	Lumbar	Premotor	divergent	LGMG	244.421	49.3151	-209.677
170508n7	Lumbar	Premotor	divergent	LGMG	567.181	-11.5385	-177.419
170508n7	Lumbar	Premotor	divergent	LGMG	-286.729	-265.992	-177.419
170508n7	Lumbar	Premotor	divergent	LGMG	117.329	181.347	-145.161
170508n7	Lumbar	Premotor	divergent	LGMG	380.144	110.881	-145.161
170508n7	Lumbar	Premotor	divergent	LGMG	605.031	232.836	-112.903
170508n7	Lumbar	Premotor	divergent	LGMG	461.95	32.8358	-112.903
170508n7	Lumbar	Premotor	divergent	LGMG	239.832	176.119	-112.903
170508n7	Lumbar	Premotor	divergent	LGMG	380.189	229.851	-112.903
170508n7	Lumbar	Premotor	divergent	LGMG	-245.122	-139.852	-80.6452
170508n7	Lumbar	Premotor	divergent	LGMG	415.682	85.0163	-80.6452
170508n7	Lumbar	Premotor	divergent	LGMG	481.874	-434.842	-80.6452
170508n7	Lumbar	Premotor	divergent	LGMG	566.171	-256.754	-48.3871
170508n7	Lumbar	Premotor	divergent	LGMG	483.631	-25.4032	-48.3871
170508n7	Lumbar	Premotor	divergent	LGMG	459.127	178.571	-48.3871
170508n7	Lumbar	Premotor	divergent	LGMG	-249.364	-231.29	-48.3871
170508n7	Lumbar	Premotor	divergent	LGMG	567.771	-35.9281	-16.129
170508n7	Lumbar	Premotor	divergent	LGMG	371.8	-30	16.129
170508n7	Lumbar	Premotor	divergent	LGMG	250.9	21.7391	16.129
170508n7	Lumbar	Premotor	divergent	LGMG	-248.083	-113.987	16.129
170508n7	Lumbar	Premotor	divergent	LGMG	-174.417	-108.04	16.129
170508n7	Lumbar	Premotor	divergent	LGMG	205.4	128.261	16.129
170508n7	Lumbar	Premotor	divergent	LGMG	-536.165	249.016	48.3871
170508n7	Lumbar	Premotor	divergent	LGMG	-447.373	267.263	48.3871
170508n7	Lumbar	Premotor	divergent	LGMG	270.833	-30.6593	48.3871
170508n7	Lumbar	Premotor	divergent	LGMG	315.78	32.3741	48.3871
170508n7	Lumbar	Premotor	divergent	LGMG	296.188	70.1439	48.3871
170508n7	Lumbar	Premotor	divergent	LGMG	473.67	173.741	48.3871
170508n7	Lumbar	Premotor	divergent	LGMG	409.131	121.942	48.3871
170508n7	Lumbar	Premotor	divergent	LGMG	417.199	104.676	48.3871
170508n7	Lumbar	Premotor	divergent	LGMG	413.741	-76.1538	48.3871
170508n7	Lumbar	Premotor	divergent	LGMG	413.741	113.309	48.3871
170508n7	Lumbar	Premotor	divergent	LGMG	333.4	-174.316	80.6452
170508n7	Lumbar	Premotor	divergent	LGMG	192.545	183.566	80.6452
170508n7	Lumbar	Premotor	divergent	LGMG	607.98	233.916	112.903
170508n7	Lumbar	Premotor	divergent	LGMG	483.232	113.287	112.903
170508n7	Lumbar	Premotor	divergent	LGMG	445.152	117.483	112.903
170508n7	Lumbar	Premotor	divergent	LGMG	552.828	51.3986	112.903
170508n7	Lumbar	Premotor	divergent	LGMG	157.576	175.175	112.903
170508n7	Lumbar	Premotor	divergent	LGMG	388.687	82.8671	112.903
170508n7	Lumbar	Premotor	divergent	LGMG	458.283	-158.385	112.903
170508n7	Lumbar	Premotor	divergent	LGMG	-256.611	-190.068	145.161
170508n7	Lumbar	Premotor	divergent	LGMG	336.673	112.892	145.161
170508n7	Lumbar	Premotor	divergent	LGMG	492.722	126.481	145.161
170508n7	Lumbar	Premotor	divergent	LGMG	394.094	124.429	177.419
170508n7	Lumbar	Premotor	divergent	LGMG	410.728	24.2531	177.419
170508n7	Lumbar	Premotor	divergent	LGMG	383.858	107.557	177.419
170508n7	Lumbar	Premotor	divergent	LGMG	217.52	131.81	177.419
170508n7	Lumbar	Premotor	divergent	LGMG	525.886	189.807	177.419
170508n7	Lumbar	Premotor	divergent	LGMG	443.996	106.503	177.419
170508n7	Lumbar	Premotor	divergent	LGMG	-180.998	-127.195	177.419
170508n7	Lumbar	Premotor	divergent	LGMG	-171.768	-209.937	209.677
170508n7	Lumbar	Premotor	divergent	LGMG	601.663	-154.688	209.677
170508n7	Lumbar	Premotor	divergent	LGMG	-376.13	-83.1081	241.935
170508n7	Lumbar	Premotor	divergent	LGMG	-179.837	-210.811	241.935
170508n7	Lumbar	Premotor	divergent	LGMG	410.874	99.4536	241.935
170508n7	Lumbar	Premotor	divergent	LGMG	-228.977	-171.91	274.194
170508n7	Lumbar	Premotor	divergent	LGMG	59.3066	4.28571	274.194
170508n7	Lumbar	Premotor	divergent	LGMG	584.744	277.007	306.452
170508n7	Lumbar	Premotor	divergent	LGMG	168.898	172.993	306.452
170508n7	Lumbar	Premotor	divergent	LGMG	217.972	123.499	338.71
170508n7	Lumbar	Premotor	divergent	LGMG	430.723	-211.481	338.71
170508n7	Lumbar	Premotor	divergent	LGMG	597.791	54.5455	338.71
170508n7	Lumbar	Premotor	divergent	LGMG	373.293	153.345	338.71
170508n7	Lumbar	Premotor	divergent	LGMG	396.787	100.858	338.71
170508n7	Lumbar	Premotor	divergent	LGMG	-263.578	-209.112	338.71
170508n7	Lumbar	Premotor	divergent	LGMG	550.694	126.655	370.968
170508n7	Lumbar	Premotor	divergent	LGMG	526.19	125.581	370.968
170508n7	Lumbar	Premotor	divergent	LGMG	426.885	158.855	370.968
170508n7	Lumbar	Premotor	divergent	LGMG	411.409	156.708	370.968
170508n7	Lumbar	Premotor	divergent	LGMG	457.837	42.9338	370.968
170508n7	Lumbar	Premotor	divergent	LGMG	545.743	-157.853	403.226
170508n7	Lumbar	Premotor	divergent	LGMG	337.228	51.6252	403.226
170508n7	Lumbar	Premotor	divergent	LGMG	347.525	84.8948	403.226
170508n7	Lumbar	Premotor	divergent	LGMG	370.693	108.987	403.226
170508n7	Lumbar	Premotor	divergent	LGMG	565.05	244.359	403.226
170508n7	Lumbar	Premotor	divergent	LGMG	499.406	153.728	403.226
170508n7	Lumbar	Premotor	divergent	LGMG	-267.442	-184.821	403.226
170508n7	Lumbar	Premotor	divergent	LGMG	304.767	-355.47	435.484
170508n7	Lumbar	Premotor	divergent	LGMG	481.809	50.3425	435.484
170508n7	Lumbar	Premotor	divergent	LGMG	367.996	160.274	435.484
170508n7	Lumbar	Premotor	divergent	LGMG	526.96	-133.703	467.742
170508n7	Lumbar	Premotor	divergent	LGMG	458.604	-27.9379	467.742
170508n7	Lumbar	Premotor	divergent	LGMG	354.207	103.521	467.742
170508n7	Lumbar	Premotor	divergent	LGMG	239.866	22.1831	467.742
170508n7	Lumbar	Premotor	divergent	LGMG	-306.227	-82.6923	467.742
170508n7	Lumbar	Premotor	divergent	LGMG	-88.3613	-125.329	500
170508n7	Lumbar	Premotor	divergent	LGMG	-257.821	-171.711	500
170508n7	Lumbar	Premotor	divergent	LGMG	450	156.089	500
170508n7	Lumbar	Premotor	divergent	LGMG	429.167	-122.198	500
170508n7	Lumbar	Premotor	divergent	LGMG	423.611	122.878	500
170508n7	Lumbar	Premotor	divergent	LGMG	460.054	121.111	532.258
170508n7	Lumbar	Premotor	divergent	LGMG	401.657	117.153	564.516
170508n7	Lumbar	Premotor	divergent	LGMG	159.649	122.628	564.516
170508n7	Lumbar	Premotor	divergent	LGMG	503.021	153.285	564.516
170508n7	Lumbar	Premotor	divergent	LGMG	394.055	94.1606	564.516
170508n7	Lumbar	Premotor	divergent	LGMG	507.853	122.814	596.774
170508n7	Lumbar	Premotor	divergent	LGMG	563.152	-413.326	629.032
170508n7	Lumbar	Premotor	divergent	LGMG	389.457	125.806	629.032
170508n7	Lumbar	Premotor	divergent	LGMG	-231.376	-180.989	661.29
170508n7	Lumbar	Premotor	divergent	LGMG	518.539	143.599	725.806
170508n7	Lumbar	Premotor	divergent	LGMG	345.693	190.353	725.806
170508n7	Lumbar	Premotor	divergent	LGMG	317.697	190.353	725.806
170508n7	Lumbar	Premotor	divergent	LGMG	283.614	261.596	725.806
170508n7	Lumbar	Premotor	divergent	LGMG	303.09	30.0557	725.806
170508n7	Lumbar	Premotor	divergent	LGMG	281.18	-43.0353	725.806
170508n7	Lumbar	Premotor	divergent	LGMG	523.263	-125.874	758.065
170508n7	Lumbar	Premotor	divergent	LGMG	509.459	211.154	758.065
170508n7	Lumbar	Premotor	divergent	LGMG	502.901	148.302	790.323
170508n7	Lumbar	Premotor	divergent	LGMG	579.091	-131.095	822.581
170508n7	Lumbar	Premotor	divergent	LGMG	650	-79.0289	822.581
170508n7	Lumbar	Premotor	divergent	LGMG	-123.702	-183.112	822.581
170508n7	Lumbar	Premotor	divergent	LGMG	426.768	0	822.581
170508n7	Lumbar	Premotor	divergent	LGMG	-167.561	-229.856	854.839
170508n7	Lumbar	Premotor	divergent	LGMG	-303.633	-298.921	854.839
170508n7	Lumbar	Premotor	divergent	LGMG	-115.83	-175.899	854.839
170508n7	Lumbar	Premotor	divergent	LGMG	444.668	-366.327	854.839
170508n7	Lumbar	Premotor	divergent	LGMG	308.652	-135.714	854.839
170508n7	Lumbar	Premotor	divergent	LGMG	640.845	-64.2857	854.839
170508n7	Lumbar	Premotor	divergent	LGMG	370.121	48.1836	854.839
170508n7	Lumbar	Premotor	divergent	LGMG	571.529	172.084	854.839
170508n7	Lumbar	Premotor	divergent	LGMG	328.27	195.029	854.839
170508n7	Lumbar	Premotor	divergent	LGMG	357.042	195.029	854.839
170508n7	Lumbar	Premotor	divergent	LGMG	-258.602	-353.666	887.097
170508n7	Lumbar	Premotor	divergent	LGMG	-222.491	-242.815	887.097
170508n7	Lumbar	Premotor	divergent	LGMG	473.069	122.449	887.097
170508n7	Lumbar	Premotor	divergent	LGMG	382.722	116.883	887.097
170508n7	Lumbar	Premotor	divergent	LGMG	235.907	123.562	887.097
170508n7	Lumbar	Premotor	divergent	LGMG	506.95	-173.077	887.097
170508n7	Lumbar	Premotor	divergent	LGMG	-341.708	-326.361	919.355
170508n7	Lumbar	Premotor	divergent	LGMG	-329.851	-190.47	919.355
170508n7	Lumbar	Premotor	divergent	LGMG	157.54	188.868	919.355
170508n7	Lumbar	Premotor	divergent	LGMG	527.469	249.904	919.355
170508n7	Lumbar	Premotor	divergent	LGMG	449.282	-229.072	919.355
170508n7	Lumbar	Premotor	divergent	LGMG	-224.545	-79.0842	951.613
170508n7	Lumbar	Premotor	divergent	LGMG	677.083	-240.771	951.613
170508n7	Lumbar	Premotor	divergent	LGMG	582.292	12.2449	951.613
170508n7	Lumbar	Premotor	divergent	LGMG	642.614	299.443	951.613
170508n7	Lumbar	Premotor	divergent	LGMG	536.742	-176.636	951.613
170508n7	Lumbar	Premotor	divergent	LGMG	397.633	298.33	951.613
170508n7	Lumbar	Premotor	divergent	LGMG	660.955	-197.01	983.871
170508n7	Lumbar	Premotor	divergent	LGMG	634.176	133.458	983.871
170508n7	Lumbar	Premotor	divergent	LGMG	-196.266	-309.591	983.871
170508n7	Lumbar	Premotor	divergent	LGMG	544.563	-409.524	1016.13
170508n7	Lumbar	Premotor	divergent	LGMG	432.175	-58.3333	1016.13
170508n7	Lumbar	Premotor	divergent	LGMG	505.169	-34.5238	1016.13
170508n7	Lumbar	Premotor	divergent	LGMG	340.642	-48.8095	1016.13
170508n7	Lumbar	Premotor	divergent	LGMG	96.1676	-11.9048	1016.13
170508n7	Lumbar	Premotor	divergent	LGMG	683.176	-155.687	1048.39
170508n7	Lumbar	Premotor	divergent	LGMG	508.696	110.134	1048.39
170508n7	Lumbar	Premotor	divergent	LGMG	243.023	210.781	1080.65
170508n7	Lumbar	Premotor	divergent	LGMG	-241.147	-269.519	1080.65
170508n7	Lumbar	Premotor	divergent	LGMG	-77.5105	-1.88679	1145.16
170508n7	Lumbar	Premotor	divergent	LGMG	350.896	118.199	1145.16
170508n7	Lumbar	Premotor	divergent	LGMG	305.578	219.512	1145.16
170508n7	Lumbar	Premotor	divergent	LGMG	383.076	-266.873	1177.42
170508n7	Lumbar	Premotor	divergent	LGMG	615.378	-39.0819	1177.42
170508n7	Lumbar	Premotor	divergent	LGMG	340.636	60.2362	1177.42
170508n7	Lumbar	Premotor	divergent	LGMG	332.818	210.236	1177.42
170508n7	Lumbar	Premotor	divergent	LGMG	629.897	-45.7816	1177.42
170508n7	Lumbar	Premotor	divergent	LGMG	596.486	-4.5	1209.68
170508n7	Lumbar	Premotor	divergent	LGMG	495.984	10.609	1209.68
170508n7	Lumbar	Premotor	divergent	LGMG	522.088	-60.75	1209.68
170508n7	Lumbar	Premotor	divergent	LGMG	527.309	-82.125	1209.68
170508n7	Lumbar	Premotor	divergent	LGMG	578.213	84.8723	1209.68
170508n7	Lumbar	Premotor	divergent	LGMG	-251.734	-286.253	1241.94
170508n7	Lumbar	Premotor	divergent	LGMG	-142.775	-254.717	1241.94
170508n7	Lumbar	Premotor	divergent	LGMG	411.708	217.544	1241.94
170508n7	Lumbar	Premotor	divergent	LGMG	596.721	120.896	1274.19
170508n7	Lumbar	Premotor	divergent	LGMG	173.536	14.5522	1274.19
170508n7	Lumbar	Premotor	divergent	LGMG	202.459	-11.0054	1274.19
170508n7	Lumbar	Premotor	divergent	LGMG	243.56	198.134	1274.19
170508n7	Lumbar	Premotor	divergent	LGMG	584.877	-55.6818	1306.45
170508n7	Lumbar	Premotor	divergent	LGMG	-411.858	253.012	1306.45
170508n7	Lumbar	Premotor	divergent	LGMG	586.585	38.171	1338.71
170508n7	Lumbar	Premotor	divergent	LGMG	-304.139	21.3439	1338.71
170508n7	Lumbar	Premotor	divergent	LGMG	327.218	210.909	1370.97
170508n7	Lumbar	Premotor	divergent	LGMG	463.636	-49.8768	1403.23
170508n7	Lumbar	Premotor	divergent	LGMG	529.545	266.385	1403.23
170508n7	Lumbar	Premotor	divergent	LGMG	353.915	160	1435.48
170508n7	Lumbar	Premotor	divergent	LGMG	346.903	-52.2099	1467.74
170508n7	Lumbar	Premotor	divergent	LGMG	384.791	-191.436	1467.74
170508n7	Lumbar	Premotor	divergent	LGMG	652.368	-128.039	1467.74
170508n7	Lumbar	Premotor	divergent	LGMG	528.051	208.75	1467.74
170508n7	Lumbar	Premotor	divergent	LGMG	422.678	-7.45856	1467.74
170508n7	Lumbar	Premotor	divergent	LGMG	438.069	202.5	1467.74
170508n7	Lumbar	Premotor	divergent	LGMG	155.1	90	1467.74
170508n7	Lumbar	Premotor	divergent	LGMG	-204.112	-207.994	1500
170508n7	Lumbar	Premotor	divergent	LGMG	406.25	207.353	1500
170508n7	Lumbar	Premotor	divergent	LGMG	560	-18.806	1500
170125n7	Lumbar	Premotor	divergent	TAPL	-204.494	-158.59	-1500
170125n7	Lumbar	Premotor	divergent	TAPL	191.176	183.949	-1380
170125n7	Lumbar	Premotor	divergent	TAPL	305.882	-321.26	-1380
170125n7	Lumbar	Premotor	divergent	TAPL	409.783	78.0096	-1380
170125n7	Lumbar	Premotor	divergent	TAPL	433.602	328.492	-1350
170125n7	Lumbar	Premotor	divergent	TAPL	428.513	-171.362	-1230
170125n7	Lumbar	Premotor	divergent	TAPL	-359.432	-272.334	-1200
170125n7	Lumbar	Premotor	divergent	TAPL	280.453	102.107	-1200
170125n7	Lumbar	Premotor	divergent	TAPL	336.234	8.75203	-1200
170125n7	Lumbar	Premotor	divergent	TAPL	387.366	-171.662	-1200
170125n7	Lumbar	Premotor	divergent	TAPL	330.636	-19.1489	-1170
170125n7	Lumbar	Premotor	divergent	TAPL	190.839	96.038	-1110
170125n7	Lumbar	Premotor	divergent	TAPL	284.823	116.006	-1110
170125n7	Lumbar	Premotor	divergent	TAPL	202.617	172.536	-1050
170125n7	Lumbar	Premotor	divergent	TAPL	352.146	-143.363	-960
170125n7	Lumbar	Premotor	divergent	TAPL	251.285	153.681	-930
170125n7	Lumbar	Premotor	divergent	TAPL	393.631	70.8589	-930
170125n7	Lumbar	Premotor	divergent	TAPL	-325.374	-265.031	-900
170125n7	Lumbar	Premotor	divergent	TAPL	360.208	-67.8994	-810
170125n7	Lumbar	Premotor	divergent	TAPL	317.107	197.302	-780
170125n7	Lumbar	Premotor	divergent	TAPL	-226.404	-242.734	-720
170125n7	Lumbar	Premotor	divergent	TAPL	322.613	56.3945	-720
170125n7	Lumbar	Premotor	divergent	TAPL	336.157	146.84	-690
170125n7	Lumbar	Premotor	divergent	TAPL	502.436	275.203	-690
170125n7	Lumbar	Premotor	divergent	TAPL	307.966	184.906	-660
170125n7	Lumbar	Premotor	divergent	TAPL	-252.973	-178.188	-630
170125n7	Lumbar	Premotor	divergent	TAPL	523.457	105.822	-630
170125n7	Lumbar	Premotor	divergent	TAPL	59.0909	39.172	-570
170125n7	Lumbar	Premotor	divergent	TAPL	357.428	11.465	-570
170125n7	Lumbar	Premotor	divergent	TAPL	388.531	-23.5714	-480
170125n7	Lumbar	Premotor	divergent	TAPL	-300.845	-248.031	-450
170125n7	Lumbar	Premotor	divergent	TAPL	14.3232	115.461	-450
170125n7	Lumbar	Premotor	divergent	TAPL	249.633	196.382	-450
170125n7	Lumbar	Premotor	divergent	TAPL	97.9452	199.061	-420
170125n7	Lumbar	Premotor	divergent	TAPL	306.45	-377.778	-420
170125n7	Lumbar	Premotor	divergent	TAPL	325	-165.556	-420
170125n7	Lumbar	Premotor	divergent	TAPL	355.422	218.779	-420
170125n7	Lumbar	Premotor	divergent	TAPL	518.872	-54.328	-390
170125n7	Lumbar	Premotor	divergent	TAPL	609.111	-21.5262	-390
170125n7	Lumbar	Premotor	divergent	TAPL	121.613	2.71903	-360
170125n7	Lumbar	Premotor	divergent	TAPL	248.817	231.118	-360
170125n7	Lumbar	Premotor	divergent	TAPL	-89.1877	23.3628	-330
170125n7	Lumbar	Premotor	divergent	TAPL	203.521	112.141	-300
170125n7	Lumbar	Premotor	divergent	TAPL	327.465	107.348	-300
170125n7	Lumbar	Premotor	divergent	TAPL	63.6824	18.8383	-270
170125n7	Lumbar	Premotor	divergent	TAPL	-79.876	-125.348	-210
170125n7	Lumbar	Premotor	divergent	TAPL	354.797	135.225	-210
170125n7	Lumbar	Premotor	divergent	TAPL	32.9203	62.7575	-180
170125n7	Lumbar	Premotor	divergent	TAPL	268.117	185.28	-150
170125n7	Lumbar	Premotor	divergent	TAPL	403.406	285.12	-150
170125n7	Lumbar	Premotor	divergent	TAPL	426.774	-11.4213	-150
170125n7	Lumbar	Premotor	divergent	TAPL	-138.546	-223.797	-120
170125n7	Lumbar	Premotor	divergent	TAPL	40.8183	86.7925	-120
170125n7	Lumbar	Premotor	divergent	TAPL	150.904	60.3774	-120
170125n7	Lumbar	Premotor	divergent	TAPL	311.085	129.245	-120
170125n7	Lumbar	Premotor	divergent	TAPL	233.614	109.091	-90
170125n7	Lumbar	Premotor	divergent	TAPL	237.475	7.79221	-90
170125n7	Lumbar	Premotor	divergent	TAPL	425.396	173.377	-90
170125n7	Lumbar	Premotor	divergent	TAPL	-265.484	-267.056	-60
170125n7	Lumbar	Premotor	divergent	TAPL	71.1538	-5.30973	-60
170125n7	Lumbar	Premotor	divergent	TAPL	228.846	52.8846	-60
170125n7	Lumbar	Premotor	divergent	TAPL	-220.536	-246.923	-30
170125n7	Lumbar	Premotor	divergent	TAPL	252.194	131.633	-30
170125n7	Lumbar	Premotor	divergent	TAPL	449.803	118.671	0
170125n7	Lumbar	Premotor	divergent	TAPL	-176.33	-284.391	30
170125n7	Lumbar	Premotor	divergent	TAPL	409.783	262.428	30
170125n7	Lumbar	Premotor	divergent	TAPL	365.456	-57.5893	90
170125n7	Lumbar	Premotor	divergent	TAPL	-171.196	-269.776	120
170125n7	Lumbar	Premotor	divergent	TAPL	403.216	266.779	120
170125n7	Lumbar	Premotor	divergent	TAPL	-176.784	-239.062	150
170125n7	Lumbar	Premotor	divergent	TAPL	335.578	165.128	150
170125n7	Lumbar	Premotor	divergent	TAPL	350.898	-35.0467	150
170125n7	Lumbar	Premotor	divergent	TAPL	322.286	95.0086	180
170125n7	Lumbar	Premotor	divergent	TAPL	332.402	130.392	210
170125n7	Lumbar	Premotor	divergent	TAPL	282.255	-400.139	240
170125n7	Lumbar	Premotor	divergent	TAPL	290.397	-368.975	240
170125n7	Lumbar	Premotor	divergent	TAPL	238.901	-6.5407	270
170125n7	Lumbar	Premotor	divergent	TAPL	-144.287	-260.587	330
170125n7	Lumbar	Premotor	divergent	TAPL	392.68	192.652	330
170125n7	Lumbar	Premotor	divergent	TAPL	-127.759	-256.977	360
170125n7	Lumbar	Premotor	divergent	TAPL	-79.3996	-160.641	390
170125n7	Lumbar	Premotor	divergent	TAPL	183.333	378.397	390
170125n7	Lumbar	Premotor	divergent	TAPL	272.667	95.122	390
170125n7	Lumbar	Premotor	divergent	TAPL	454.667	358.537	390
170125n7	Lumbar	Premotor	divergent	TAPL	631.776	-61.4826	450
170125n7	Lumbar	Premotor	divergent	TAPL	270.665	177.202	480
170125n7	Lumbar	Premotor	divergent	TAPL	95.88	20.0637	540
170125n7	Lumbar	Premotor	divergent	TAPL	97.2024	42.0382	540
170125n7	Lumbar	Premotor	divergent	TAPL	382.962	92.1536	570
170125n7	Lumbar	Premotor	divergent	TAPL	404.352	116.194	570
170125n7	Lumbar	Premotor	divergent	TAPL	500.265	294.491	570
170125n7	Lumbar	Premotor	divergent	TAPL	197.503	1.07143	600
170125n7	Lumbar	Premotor	divergent	TAPL	200.208	221.786	600
170125n7	Lumbar	Premotor	divergent	TAPL	374.037	140.357	600
170125n7	Lumbar	Premotor	divergent	TAPL	432.882	189.643	600
170125n7	Lumbar	Premotor	divergent	TAPL	-176.293	-210.638	660
170125n7	Lumbar	Premotor	divergent	TAPL	308.8	167.753	660
170125n7	Lumbar	Premotor	divergent	TAPL	309.461	153.345	660
170125n7	Lumbar	Premotor	divergent	TAPL	406.002	175.986	660
170125n7	Lumbar	Premotor	divergent	TAPL	218.268	177.895	690
170125n7	Lumbar	Premotor	divergent	TAPL	358.976	255.789	690
170125n7	Lumbar	Premotor	divergent	TAPL	373.39	201.053	690
170125n7	Lumbar	Premotor	divergent	TAPL	338.441	242.685	720
170125n7	Lumbar	Premotor	divergent	TAPL	390	206.25	750
170125n7	Lumbar	Premotor	divergent	TAPL	-258.108	-220.807	810
170125n7	Lumbar	Premotor	divergent	TAPL	-166.892	-241.77	810
170125n7	Lumbar	Premotor	divergent	TAPL	379.695	185.143	810
170125n7	Lumbar	Premotor	divergent	TAPL	384.451	105.143	810
170125n7	Lumbar	Premotor	divergent	TAPL	228.704	149.721	840
170125n7	Lumbar	Premotor	divergent	TAPL	407.135	229.05	840
170125n7	Lumbar	Premotor	divergent	TAPL	140.196	116.87	870
170125n7	Lumbar	Premotor	divergent	TAPL	529.63	-74.7922	870
170125n7	Lumbar	Premotor	divergent	TAPL	-326.684	-84.7826	900
170125n7	Lumbar	Premotor	divergent	TAPL	429.113	223.923	900
170125n7	Lumbar	Premotor	divergent	TAPL	499.459	222.01	900
170125n7	Lumbar	Premotor	divergent	TAPL	486.123	326.633	930
170125n7	Lumbar	Premotor	divergent	TAPL	-150.755	-202.624	990
170125n7	Lumbar	Premotor	divergent	TAPL	331.331	274.346	990
170125n7	Lumbar	Premotor	divergent	TAPL	345.4	213.613	990
170125n7	Lumbar	Premotor	divergent	TAPL	-158.571	-237.611	1020
170125n7	Lumbar	Premotor	divergent	TAPL	154.903	10.772	1020
170125n7	Lumbar	Premotor	divergent	TAPL	-422.758	280.076	1050
170125n7	Lumbar	Premotor	divergent	TAPL	-182.974	-300	1050
170125n7	Lumbar	Premotor	divergent	TAPL	-138.706	-196.364	1050
170125n7	Lumbar	Premotor	divergent	TAPL	115.966	13.7566	1050
170125n7	Lumbar	Premotor	divergent	TAPL	192.784	113.228	1050
170125n7	Lumbar	Premotor	divergent	TAPL	327.216	114.286	1050
170125n7	Lumbar	Premotor	divergent	TAPL	490.455	-14.5161	1050
170125n7	Lumbar	Premotor	divergent	TAPL	366.404	58.8235	1080
170125n7	Lumbar	Premotor	divergent	TAPL	512.965	-169.091	1080
170125n7	Lumbar	Premotor	divergent	TAPL	381.374	296.484	1110
170125n7	Lumbar	Premotor	divergent	TAPL	194.359	33.5484	1140
170125n7	Lumbar	Premotor	divergent	TAPL	231.38	-35.828	1140
170125n7	Lumbar	Premotor	divergent	TAPL	236.364	-53.0255	1140
170125n7	Lumbar	Premotor	divergent	TAPL	257.722	-97.4522	1140
170125n7	Lumbar	Premotor	divergent	TAPL	332.475	153.548	1140
170125n7	Lumbar	Premotor	divergent	TAPL	341.731	211.613	1140
170125n7	Lumbar	Premotor	divergent	TAPL	537.514	295.484	1140
170125n7	Lumbar	Premotor	divergent	TAPL	427.674	16.4534	1170
170125n7	Lumbar	Premotor	divergent	TAPL	444.652	55.9415	1170
170125n7	Lumbar	Premotor	divergent	TAPL	228.571	-38.4956	1200
170125n7	Lumbar	Premotor	divergent	TAPL	419.048	215.575	1200
170125n7	Lumbar	Premotor	divergent	TAPL	440.476	226.195	1200
170125n7	Lumbar	Premotor	divergent	TAPL	-114.884	-240.492	1230
170125n7	Lumbar	Premotor	divergent	TAPL	402.59	140.246	1230
170125n7	Lumbar	Premotor	divergent	TAPL	490.428	-18.5294	1230
170125n7	Lumbar	Premotor	divergent	TAPL	-242.736	-330.723	1260
170125n7	Lumbar	Premotor	divergent	TAPL	254.639	164.189	1260
170125n7	Lumbar	Premotor	divergent	TAPL	286.655	150	1260
170125n7	Lumbar	Premotor	divergent	TAPL	374.513	80.0676	1260
170125n7	Lumbar	Premotor	divergent	TAPL	73.5995	-16.1677	1290
170125n7	Lumbar	Premotor	divergent	TAPL	248.689	69.9454	1290
170125n7	Lumbar	Premotor	divergent	TAPL	326.162	111.475	1290
170125n7	Lumbar	Premotor	divergent	TAPL	-129.261	-294.175	1320
170125n7	Lumbar	Premotor	divergent	TAPL	153.583	222.385	1320
170125n7	Lumbar	Premotor	divergent	TAPL	302.072	89.1743	1320
170125n7	Lumbar	Premotor	divergent	TAPL	427.996	28.6239	1320
170125n7	Lumbar	Premotor	divergent	TAPL	438.186	-81.25	1320
170125n7	Lumbar	Premotor	divergent	TAPL	460.022	15.4128	1320
170125n7	Lumbar	Premotor	divergent	TAPL	412.14	-203.425	1350
170125n7	Lumbar	Premotor	divergent	TAPL	221.329	-162.636	1380
170125n7	Lumbar	Premotor	divergent	TAPL	379.298	128.485	1410
170125n7	Lumbar	Premotor	divergent	TAPL	-232.455	-328.743	1440
170125n7	Lumbar	Premotor	divergent	TAPL	85.9195	-3.71901	1440
170125n7	Lumbar	Premotor	divergent	TAPL	85.9195	17.9577	1440
170125n7	Lumbar	Premotor	divergent	TAPL	407.384	38.5714	1440
170125n7	Lumbar	Premotor	divergent	TAPL	440.64	71.7857	1440
170125n7	Lumbar	Premotor	divergent	TAPL	497.326	-440.847	1440
170125n7	Lumbar	Premotor	divergent	TAPL	568.563	36.9718	1440
170125n7	Lumbar	Premotor	divergent	TAPL	600.69	-193.388	1440
170214n8	Lumbar	Premotor	divergent	TAPL	169.984	164.037	-1473.21
170214n8	Lumbar	Premotor	divergent	TAPL	326.069	9.48617	-1446.43
170214n8	Lumbar	Premotor	divergent	TAPL	431.842	-88.2353	-1312.5
170214n8	Lumbar	Premotor	divergent	TAPL	646.88	-187.5	-1258.93
170214n8	Lumbar	Premotor	divergent	TAPL	-291.269	65.6772	-1232.14
170214n8	Lumbar	Premotor	divergent	TAPL	281.631	77.2532	-1232.14
170214n8	Lumbar	Premotor	divergent	TAPL	479.592	-7.30519	-1178.57
170214n8	Lumbar	Premotor	divergent	TAPL	244.599	20.6452	-1151.79
170214n8	Lumbar	Premotor	divergent	TAPL	-182.092	-193.939	-1151.79
170214n8	Lumbar	Premotor	divergent	TAPL	291.028	252.903	-1151.79
170214n8	Lumbar	Premotor	divergent	TAPL	280.751	28.2927	-1125
170214n8	Lumbar	Premotor	divergent	TAPL	307.598	-353.349	-1098.21
170214n8	Lumbar	Premotor	divergent	TAPL	275.758	84.0517	-1044.64
170214n8	Lumbar	Premotor	divergent	TAPL	-269.065	65.4344	-1044.64
170214n8	Lumbar	Premotor	divergent	TAPL	590.828	-226.65	-964.286
170214n8	Lumbar	Premotor	divergent	TAPL	399.078	-19.2399	-937.5
170214n8	Lumbar	Premotor	divergent	TAPL	273.261	237.624	-910.714
170214n8	Lumbar	Premotor	divergent	TAPL	-134.807	-40.8	-883.929
170214n8	Lumbar	Premotor	divergent	TAPL	235.673	70.0637	-830.357
170214n8	Lumbar	Premotor	divergent	TAPL	124.488	387.261	-830.357
170214n8	Lumbar	Premotor	divergent	TAPL	443.787	-150	-830.357
170214n8	Lumbar	Premotor	divergent	TAPL	502.705	21.6561	-830.357
170214n8	Lumbar	Premotor	divergent	TAPL	514.108	11.465	-830.357
170214n8	Lumbar	Premotor	divergent	TAPL	-170.656	-260.024	-803.571
170214n8	Lumbar	Premotor	divergent	TAPL	-234.234	-250.472	-803.571
170214n8	Lumbar	Premotor	divergent	TAPL	484.176	53.6779	-803.571
170214n8	Lumbar	Premotor	divergent	TAPL	247.018	121.788	-776.786
170214n8	Lumbar	Premotor	divergent	TAPL	275.572	268.739	-750
170214n8	Lumbar	Premotor	divergent	TAPL	333.929	180.776	-696.429
170214n8	Lumbar	Premotor	divergent	TAPL	169.935	44.1026	-669.643
170214n8	Lumbar	Premotor	divergent	TAPL	168.235	258.462	-669.643
170214n8	Lumbar	Premotor	divergent	TAPL	122.045	10.3846	-642.857
170214n8	Lumbar	Premotor	divergent	TAPL	586.718	115.385	-642.857
170214n8	Lumbar	Premotor	divergent	TAPL	-178.552	-265.385	-642.857
170214n8	Lumbar	Premotor	divergent	TAPL	328.138	-45.6683	-616.071
170214n8	Lumbar	Premotor	divergent	TAPL	305.516	42.6396	-589.286
170214n8	Lumbar	Premotor	divergent	TAPL	264.988	36.5482	-589.286
170214n8	Lumbar	Premotor	divergent	TAPL	440.17	-195.983	-562.5
170214n8	Lumbar	Premotor	divergent	TAPL	339.988	-7.61099	-562.5
170214n8	Lumbar	Premotor	divergent	TAPL	359.687	291.346	-535.714
170214n8	Lumbar	Premotor	divergent	TAPL	502.958	-264	-535.714
170214n8	Lumbar	Premotor	divergent	TAPL	275.232	73.0769	-535.714
170214n8	Lumbar	Premotor	divergent	TAPL	145.534	175.962	-535.714
170214n8	Lumbar	Premotor	divergent	TAPL	358.723	262.745	-508.929
170214n8	Lumbar	Premotor	divergent	TAPL	191.22	0	-508.929
170214n8	Lumbar	Premotor	divergent	TAPL	436.567	114.467	-482.143
170214n8	Lumbar	Premotor	divergent	TAPL	493.968	-9.78261	-482.143
170214n8	Lumbar	Premotor	divergent	TAPL	258.698	63.9706	-455.357
170214n8	Lumbar	Premotor	divergent	TAPL	174.906	76.1029	-455.357
170214n8	Lumbar	Premotor	divergent	TAPL	146.433	234.926	-455.357
170214n8	Lumbar	Premotor	divergent	TAPL	544.243	-184.948	-455.357
170214n8	Lumbar	Premotor	divergent	TAPL	-56.1211	-208.971	-455.357
170214n8	Lumbar	Premotor	divergent	TAPL	262.417	63.5161	-428.571
170214n8	Lumbar	Premotor	divergent	TAPL	391.899	139.509	-428.571
170214n8	Lumbar	Premotor	divergent	TAPL	450.598	206.427	-428.571
170214n8	Lumbar	Premotor	divergent	TAPL	-153.518	-111.724	-428.571
170214n8	Lumbar	Premotor	divergent	TAPL	323.379	177.273	-401.786
170214n8	Lumbar	Premotor	divergent	TAPL	536.082	-265.468	-348.214
170214n8	Lumbar	Premotor	divergent	TAPL	260.503	6.88337	-348.214
170214n8	Lumbar	Premotor	divergent	TAPL	273.165	-18.6207	-321.429
170214n8	Lumbar	Premotor	divergent	TAPL	167.025	261.407	-321.429
170214n8	Lumbar	Premotor	divergent	TAPL	102.987	2	-294.643
170214n8	Lumbar	Premotor	divergent	TAPL	441.136	111.628	-267.857
170214n8	Lumbar	Premotor	divergent	TAPL	-104.139	-167.246	-267.857
170214n8	Lumbar	Premotor	divergent	TAPL	310.162	-61.4691	-241.071
170214n8	Lumbar	Premotor	divergent	TAPL	295.803	-6.95876	-241.071
170214n8	Lumbar	Premotor	divergent	TAPL	61.2666	3.66599	-241.071
170214n8	Lumbar	Premotor	divergent	TAPL	421.208	188.187	-241.071
170214n8	Lumbar	Premotor	divergent	TAPL	236.451	96.5377	-241.071
170214n8	Lumbar	Premotor	divergent	TAPL	122.973	126.039	-214.286
170214n8	Lumbar	Premotor	divergent	TAPL	413.3	157.549	-214.286
170214n8	Lumbar	Premotor	divergent	TAPL	51.7045	12.3596	-187.5
170214n8	Lumbar	Premotor	divergent	TAPL	341.414	108.989	-187.5
170214n8	Lumbar	Premotor	divergent	TAPL	110.795	132.584	-187.5
170214n8	Lumbar	Premotor	divergent	TAPL	271.592	-9.73558	-160.714
170214n8	Lumbar	Premotor	divergent	TAPL	542.357	-271.514	-160.714
170214n8	Lumbar	Premotor	divergent	TAPL	363.161	41.1326	-133.929
170214n8	Lumbar	Premotor	divergent	TAPL	157.677	256.632	-133.929
170214n8	Lumbar	Premotor	divergent	TAPL	-115.323	-136.792	-133.929
170214n8	Lumbar	Premotor	divergent	TAPL	307.806	55.4396	-133.929
170214n8	Lumbar	Premotor	divergent	TAPL	101.667	6.6879	-107.143
170214n8	Lumbar	Premotor	divergent	TAPL	213.975	-104.63	-80.3571
170214n8	Lumbar	Premotor	divergent	TAPL	319.752	161.311	-80.3571
170214n8	Lumbar	Premotor	divergent	TAPL	331.056	114.098	-80.3571
170214n8	Lumbar	Premotor	divergent	TAPL	261.615	48.1967	-80.3571
170214n8	Lumbar	Premotor	divergent	TAPL	150.994	109.18	-80.3571
170214n8	Lumbar	Premotor	divergent	TAPL	303.272	-84.375	-53.5714
170214n8	Lumbar	Premotor	divergent	TAPL	57.3257	-20.788	-53.5714
170214n8	Lumbar	Premotor	divergent	TAPL	402.205	171.602	-53.5714
170214n8	Lumbar	Premotor	divergent	TAPL	226.529	73.0223	-53.5714
170214n8	Lumbar	Premotor	divergent	TAPL	283.855	-22.0109	-53.5714
170214n8	Lumbar	Premotor	divergent	TAPL	-111.626	-158.974	-53.5714
170214n8	Lumbar	Premotor	divergent	TAPL	49.9289	-37.9076	-53.5714
170214n8	Lumbar	Premotor	divergent	TAPL	35.4686	-54.4146	-26.7857
170214n8	Lumbar	Premotor	divergent	TAPL	428.552	110.843	26.7857
170214n8	Lumbar	Premotor	divergent	TAPL	198.349	4.95868	53.5714
170214n8	Lumbar	Premotor	divergent	TAPL	305.68	292.562	53.5714
170214n8	Lumbar	Premotor	divergent	TAPL	-171.356	-137.966	53.5714
170214n8	Lumbar	Premotor	divergent	TAPL	65	-1.1509	80.3571
170214n8	Lumbar	Premotor	divergent	TAPL	366.728	-25.3197	80.3571
170214n8	Lumbar	Premotor	divergent	TAPL	357.099	46.7532	80.3571
170214n8	Lumbar	Premotor	divergent	TAPL	368.333	46.7532	80.3571
170214n8	Lumbar	Premotor	divergent	TAPL	450.988	-447.698	80.3571
170214n8	Lumbar	Premotor	divergent	TAPL	343.343	-87.3134	107.143
170214n8	Lumbar	Premotor	divergent	TAPL	242.75	107.822	133.929
170214n8	Lumbar	Premotor	divergent	TAPL	192.955	209.302	133.929
170214n8	Lumbar	Premotor	divergent	TAPL	157.387	-22.8169	133.929
170214n8	Lumbar	Premotor	divergent	TAPL	200.068	16.4905	133.929
170214n8	Lumbar	Premotor	divergent	TAPL	339.672	234.672	133.929
170214n8	Lumbar	Premotor	divergent	TAPL	117.373	36.7865	133.929
170214n8	Lumbar	Premotor	divergent	TAPL	-307.751	-276.273	133.929
170214n8	Lumbar	Premotor	divergent	TAPL	360.682	115.706	160.714
170214n8	Lumbar	Premotor	divergent	TAPL	131.321	150	187.5
170214n8	Lumbar	Premotor	divergent	TAPL	483.99	-300.593	187.5
170214n8	Lumbar	Premotor	divergent	TAPL	327.891	219.318	187.5
170214n8	Lumbar	Premotor	divergent	TAPL	338.628	218.182	187.5
170214n8	Lumbar	Premotor	divergent	TAPL	237.039	242.045	187.5
170214n8	Lumbar	Premotor	divergent	TAPL	-220.874	-191.729	187.5
170214n8	Lumbar	Premotor	divergent	TAPL	249.866	24.6407	214.286
170214n8	Lumbar	Premotor	divergent	TAPL	131.048	46.8172	214.286
170214n8	Lumbar	Premotor	divergent	TAPL	-332.996	-370.505	214.286
170214n8	Lumbar	Premotor	divergent	TAPL	288.019	37.2816	241.071
170214n8	Lumbar	Premotor	divergent	TAPL	223.628	22.1359	241.071
170214n8	Lumbar	Premotor	divergent	TAPL	346.728	149.688	267.857
170214n8	Lumbar	Premotor	divergent	TAPL	412.376	209.563	267.857
170214n8	Lumbar	Premotor	divergent	TAPL	395.733	-46.0358	267.857
170214n8	Lumbar	Premotor	divergent	TAPL	-52.3657	18.038	294.643
170214n8	Lumbar	Premotor	divergent	TAPL	241.944	10.8731	294.643
170214n8	Lumbar	Premotor	divergent	TAPL	193.556	68.2043	294.643
170214n8	Lumbar	Premotor	divergent	TAPL	28.8512	-34.1108	321.429
170214n8	Lumbar	Premotor	divergent	TAPL	-230.969	-252.174	348.214
170214n8	Lumbar	Premotor	divergent	TAPL	181.316	47.5248	375
170214n8	Lumbar	Premotor	divergent	TAPL	392.526	271.374	401.786
170214n8	Lumbar	Premotor	divergent	TAPL	440.895	345.985	428.571
170214n8	Lumbar	Premotor	divergent	TAPL	309.712	142.336	428.571
170214n8	Lumbar	Premotor	divergent	TAPL	472.321	-434.4	428.571
170214n8	Lumbar	Premotor	divergent	TAPL	137.591	52.514	455.357
170214n8	Lumbar	Premotor	divergent	TAPL	406.131	73.743	455.357
170214n8	Lumbar	Premotor	divergent	TAPL	599.038	-244.11	482.143
170214n8	Lumbar	Premotor	divergent	TAPL	336.538	100.394	482.143
170214n8	Lumbar	Premotor	divergent	TAPL	283.873	-12.2356	508.929
170214n8	Lumbar	Premotor	divergent	TAPL	471.451	317.647	508.929
170214n8	Lumbar	Premotor	divergent	TAPL	231.055	114.286	535.714
170214n8	Lumbar	Premotor	divergent	TAPL	403.711	142.857	535.714
170214n8	Lumbar	Premotor	divergent	TAPL	-209.518	-283.12	589.286
170214n8	Lumbar	Premotor	divergent	TAPL	233.152	206.538	589.286
170214n8	Lumbar	Premotor	divergent	TAPL	451.291	147.692	589.286
170214n8	Lumbar	Premotor	divergent	TAPL	140.421	13.8462	589.286
170214n8	Lumbar	Premotor	divergent	TAPL	-408.3	246.656	616.071
170214n8	Lumbar	Premotor	divergent	TAPL	348.593	161.143	616.071
170214n8	Lumbar	Premotor	divergent	TAPL	122.081	258.545	642.857
170214n8	Lumbar	Premotor	divergent	TAPL	396.764	173.455	642.857
170214n8	Lumbar	Premotor	divergent	TAPL	275.176	232.727	696.429
170214n8	Lumbar	Premotor	divergent	TAPL	460.759	92.1212	696.429
170214n8	Lumbar	Premotor	divergent	TAPL	574.264	-30.1386	723.214
170214n8	Lumbar	Premotor	divergent	TAPL	237.196	379.058	750
170214n8	Lumbar	Premotor	divergent	TAPL	79.3082	144	776.786
170214n8	Lumbar	Premotor	divergent	TAPL	240.377	19	776.786
170214n8	Lumbar	Premotor	divergent	TAPL	253.459	16	776.786
170214n8	Lumbar	Premotor	divergent	TAPL	413.711	181	776.786
170214n8	Lumbar	Premotor	divergent	TAPL	111.757	42.4779	803.571
170214n8	Lumbar	Premotor	divergent	TAPL	69.8483	0	803.571
170214n8	Lumbar	Premotor	divergent	TAPL	517.699	-184.351	803.571
170214n8	Lumbar	Premotor	divergent	TAPL	125.901	39.9217	910.714
170214n8	Lumbar	Premotor	divergent	TAPL	153.228	32.8767	910.714
170214n8	Lumbar	Premotor	divergent	TAPL	-123.208	-269.107	937.5
170214n8	Lumbar	Premotor	divergent	TAPL	94.6521	15.8416	964.286
170214n8	Lumbar	Premotor	divergent	TAPL	458.183	39.604	964.286
170214n8	Lumbar	Premotor	divergent	TAPL	-285.571	-156.189	991.071
170214n8	Lumbar	Premotor	divergent	TAPL	437.755	214.712	1017.86
170214n8	Lumbar	Premotor	divergent	TAPL	216.667	-103.944	1017.86
170214n8	Lumbar	Premotor	divergent	TAPL	83.0396	19.0678	1071.43
170214n8	Lumbar	Premotor	divergent	TAPL	405.653	247.881	1071.43
170214n8	Lumbar	Premotor	divergent	TAPL	244.843	189.344	1098.21
170214n8	Lumbar	Premotor	divergent	TAPL	140.295	264.529	1125
170214n8	Lumbar	Premotor	divergent	TAPL	203.846	278.182	1151.79
170214n8	Lumbar	Premotor	divergent	TAPL	234.292	-113.333	1205.36
170214n8	Lumbar	Premotor	divergent	TAPL	664.586	-297.778	1205.36
170214n8	Lumbar	Premotor	divergent	TAPL	650.912	-27.7778	1205.36
170214n8	Lumbar	Premotor	divergent	TAPL	180.335	111.708	1232.14
170214n8	Lumbar	Premotor	divergent	TAPL	464.71	-82.8645	1232.14
170214n8	Lumbar	Premotor	divergent	TAPL	346.438	242.328	1258.93
170214n8	Lumbar	Premotor	divergent	TAPL	526.087	110.383	1285.71
170214n8	Lumbar	Premotor	divergent	TAPL	395.652	-312.617	1285.71
170214n8	Lumbar	Premotor	divergent	TAPL	564.13	257.923	1285.71
170214n8	Lumbar	Premotor	divergent	TAPL	275.654	232.323	1312.5
170214n8	Lumbar	Premotor	divergent	TAPL	287.379	-83.1378	1366.07
170214n8	Lumbar	Premotor	divergent	TAPL	335.45	174.894	1366.07
170214n8	Lumbar	Premotor	divergent	TAPL	307.259	141.27	1419.64
170214n8	Lumbar	Premotor	divergent	TAPL	454.085	15	1446.43
170214n8	Lumbar	Premotor	divergent	TAPL	301.142	188.476	1500
170427n2	Lumbar	Premotor	divergent	LGTA	246.161	274.116	1071.43
170427n2	Lumbar	Premotor	divergent	LGTA	-528.125	70.6408	1098.21
170427n2	Lumbar	Premotor	divergent	LGTA	555.373	1.66205	1125
170427n2	Lumbar	Premotor	divergent	LGTA	571.77	-312.533	1151.79
170427n2	Lumbar	Premotor	divergent	LGTA	458.145	-104.83	1178.57
170427n2	Lumbar	Premotor	divergent	LGTA	114.884	117.666	1205.36
170427n2	Lumbar	Premotor	divergent	LGTA	122.946	118.639	1205.36
170427n2	Lumbar	Premotor	divergent	LGTA	74.9605	202.346	1205.36
170427n2	Lumbar	Premotor	divergent	LGTA	-153.502	-140.146	1232.14
170427n2	Lumbar	Premotor	divergent	LGTA	393.878	-2.38727	1232.14
170427n2	Lumbar	Premotor	divergent	LGTA	372.137	-300.668	1258.93
170427n2	Lumbar	Premotor	divergent	LGTA	175.519	134.954	1285.71
170427n2	Lumbar	Premotor	divergent	LGTA	232.418	257.143	1285.71
170427n2	Lumbar	Premotor	divergent	LGTA	341.708	-88.1549	1285.71
170427n2	Lumbar	Premotor	divergent	LGTA	315.837	-85.0797	1312.5
170427n2	Lumbar	Premotor	divergent	LGTA	379.262	37.8299	1339.29
170427n2	Lumbar	Premotor	divergent	LGTA	385.757	293.787	1366.07
170427n2	Lumbar	Premotor	divergent	LGTA	254.486	60.438	1366.07
170427n2	Lumbar	Premotor	divergent	LGTA	274.633	107.737	1392.86
170427n2	Lumbar	Premotor	divergent	LGTA	220.98	48.2861	1419.64
170427n2	Lumbar	Premotor	divergent	LGTA	66.2669	-23.5808	1446.43
170427n2	Lumbar	Premotor	divergent	LGTA	302.1	-15.0358	1473.21
170427n2	Lumbar	Premotor	divergent	LGTA	379.607	17.0404	1500
170427n2	Lumbar	Premotor	divergent	LGTA	504.357	-133.294	-503.356
170427n2	Lumbar	Premotor	divergent	LGTA	180.705	50.7289	-503.356
170427n2	Lumbar	Premotor	divergent	LGTA	290.387	76.0933	-503.356
170427n2	Lumbar	Premotor	divergent	LGTA	324.55	174.927	-503.356
170427n2	Lumbar	Premotor	divergent	LGTA	241.984	41.9019	-473.154
170427n2	Lumbar	Premotor	divergent	LGTA	457.955	175	-442.953
170427n2	Lumbar	Premotor	divergent	LGTA	73.9914	49.6434	-352.349
170427n2	Lumbar	Premotor	divergent	LGTA	245.389	259.344	-352.349
170427n2	Lumbar	Premotor	divergent	LGTA	331.556	328.673	-352.349
170427n2	Lumbar	Premotor	divergent	LGTA	241.838	90.881	-322.148
170427n2	Lumbar	Premotor	divergent	LGTA	294.412	301.391	-322.148
170427n2	Lumbar	Premotor	divergent	LGTA	353.676	308.81	-322.148
170427n2	Lumbar	Premotor	divergent	LGTA	230.274	17.9104	-291.946
170427n2	Lumbar	Premotor	divergent	LGTA	-121.731	14.2857	-261.745
170427n2	Lumbar	Premotor	divergent	LGTA	552.928	19.062	-261.745
170427n2	Lumbar	Premotor	divergent	LGTA	433.016	284.115	-261.745
170427n2	Lumbar	Premotor	divergent	LGTA	-209.635	-166.882	-231.544
170427n2	Lumbar	Premotor	divergent	LGTA	261.404	-22.5513	-201.342
170427n2	Lumbar	Premotor	divergent	LGTA	173.395	81.7391	-171.141
170427n2	Lumbar	Premotor	divergent	LGTA	149.287	100.87	-171.141
170427n2	Lumbar	Premotor	divergent	LGTA	249.032	206.987	-140.94
170427n2	Lumbar	Premotor	divergent	LGTA	250.83	216.594	-140.94
170427n2	Lumbar	Premotor	divergent	LGTA	350.168	47.3684	-110.738
170427n2	Lumbar	Premotor	divergent	LGTA	435.519	-422.185	-80.5369
170427n2	Lumbar	Premotor	divergent	LGTA	418.66	-366.556	-80.5369
170427n2	Lumbar	Premotor	divergent	LGTA	326.873	-67.5497	-80.5369
170427n2	Lumbar	Premotor	divergent	LGTA	560.377	-349.436	-50.3356
170427n2	Lumbar	Premotor	divergent	LGTA	227.399	61.2245	-50.3356
170427n2	Lumbar	Premotor	divergent	LGTA	159.434	167.89	-50.3356
170427n2	Lumbar	Premotor	divergent	LGTA	163.208	265.138	-50.3356
170427n2	Lumbar	Premotor	divergent	LGTA	345.283	307.339	-50.3356
170427n2	Lumbar	Premotor	divergent	LGTA	347.17	314.679	-50.3356
170427n2	Lumbar	Premotor	divergent	LGTA	255.325	1.69014	-20.1342
170427n2	Lumbar	Premotor	divergent	LGTA	394.675	316.901	-20.1342
170427n2	Lumbar	Premotor	divergent	LGTA	-160.575	-272.561	10.0671
170427n2	Lumbar	Premotor	divergent	LGTA	-265.059	-268.902	10.0671
170427n2	Lumbar	Premotor	divergent	LGTA	322.042	-43.4831	10.0671
170427n2	Lumbar	Premotor	divergent	LGTA	208.778	239.492	10.0671
170427n2	Lumbar	Premotor	divergent	LGTA	476.132	18.5022	70.4698
170427n2	Lumbar	Premotor	divergent	LGTA	267.49	239.648	70.4698
170427n2	Lumbar	Premotor	divergent	LGTA	270.597	114.155	100.671
170427n2	Lumbar	Premotor	divergent	LGTA	285.735	122.374	100.671
170427n2	Lumbar	Premotor	divergent	LGTA	142.868	200.913	100.671
170427n2	Lumbar	Premotor	divergent	LGTA	118.268	202.74	100.671
170427n2	Lumbar	Premotor	divergent	LGTA	344.334	221.645	130.872
170427n2	Lumbar	Premotor	divergent	LGTA	68.8982	42.1053	161.074
170427n2	Lumbar	Premotor	divergent	LGTA	169.526	50	161.074
170427n2	Lumbar	Premotor	divergent	LGTA	282.845	66.6667	161.074
170427n2	Lumbar	Premotor	divergent	LGTA	400.697	221.053	161.074
170427n2	Lumbar	Premotor	divergent	LGTA	519.456	71.5758	221.477
170427n2	Lumbar	Premotor	divergent	LGTA	330.577	246.381	251.678
170427n2	Lumbar	Premotor	divergent	LGTA	364.041	306.647	251.678
170427n2	Lumbar	Premotor	divergent	LGTA	95.5381	48.1752	281.879
170427n2	Lumbar	Premotor	divergent	LGTA	259.318	197.956	281.879
170427n2	Lumbar	Premotor	divergent	LGTA	198.753	215.474	281.879
170427n2	Lumbar	Premotor	divergent	LGTA	275.525	218.102	281.879
170427n2	Lumbar	Premotor	divergent	LGTA	395.566	-418.803	372.483
170427n2	Lumbar	Premotor	divergent	LGTA	211.697	118.574	372.483
170427n2	Lumbar	Premotor	divergent	LGTA	128.552	225.243	402.685
170427n2	Lumbar	Premotor	divergent	LGTA	331.935	-335.56	432.886
170427n2	Lumbar	Premotor	divergent	LGTA	94.3101	133.724	432.886
170427n2	Lumbar	Premotor	divergent	LGTA	174.227	167.382	463.087
170427n2	Lumbar	Premotor	divergent	LGTA	366.642	203.433	463.087
170427n2	Lumbar	Premotor	divergent	LGTA	156.897	59.1549	523.49
170427n2	Lumbar	Premotor	divergent	LGTA	156.897	68.5446	523.49
170427n2	Lumbar	Premotor	divergent	LGTA	382.095	-405.102	553.691
170427n2	Lumbar	Premotor	divergent	LGTA	166.014	193.083	553.691
170427n2	Lumbar	Premotor	divergent	LGTA	-307.478	-12.4468	583.893
170427n2	Lumbar	Premotor	divergent	LGTA	320.907	135.338	583.893
170427n2	Lumbar	Premotor	divergent	LGTA	316.038	137.598	614.094
170427n2	Lumbar	Premotor	divergent	LGTA	300	169.423	614.094
170427n2	Lumbar	Premotor	divergent	LGTA	356.604	239.626	614.094
170427n2	Lumbar	Premotor	divergent	LGTA	134.906	247.114	614.094
170427n2	Lumbar	Premotor	divergent	LGTA	409.392	180.798	644.295
170427n2	Lumbar	Premotor	divergent	LGTA	-407.89	235.683	644.295
170427n2	Lumbar	Premotor	divergent	LGTA	380.914	-48.3773	674.497
170427n2	Lumbar	Premotor	divergent	LGTA	60.2823	21.2703	674.497
170427n2	Lumbar	Premotor	divergent	LGTA	289.18	153.323	674.497
170427n2	Lumbar	Premotor	divergent	LGTA	253.36	246.381	674.497
170427n2	Lumbar	Premotor	divergent	LGTA	440.227	-74.1419	704.698
170427n2	Lumbar	Premotor	divergent	LGTA	622.23	-181.957	765.101
170427n2	Lumbar	Premotor	divergent	LGTA	617.891	-171.196	765.101
170427n2	Lumbar	Premotor	divergent	LGTA	183.111	33.8415	765.101
170427n2	Lumbar	Premotor	divergent	LGTA	347.997	101.524	765.101
170427n2	Lumbar	Premotor	divergent	LGTA	302.87	227.744	765.101
170427n2	Lumbar	Premotor	divergent	LGTA	323.698	313.72	765.101
170427n2	Lumbar	Premotor	divergent	LGTA	157.638	222.595	825.503
170427n2	Lumbar	Premotor	divergent	LGTA	209.843	251.908	825.503
170427n2	Lumbar	Premotor	divergent	LGTA	472.92	-264.089	885.906
170427n2	Lumbar	Premotor	divergent	LGTA	647.879	-146.822	885.906
170427n2	Lumbar	Premotor	divergent	LGTA	169.657	211.268	885.906
170427n2	Lumbar	Premotor	divergent	LGTA	524.602	62.6003	976.51
170427n2	Lumbar	Premotor	divergent	LGTA	289.912	275.441	976.51
170427n2	Lumbar	Premotor	divergent	LGTA	355.051	128.91	1036.91
170427n2	Lumbar	Premotor	divergent	LGTA	280.479	190.521	1036.91
170427n2	Lumbar	Premotor	divergent	LGTA	262.671	192.417	1036.91
170427n2	Lumbar	Premotor	divergent	LGTA	162.5	196.209	1036.91
170427n2	Lumbar	Premotor	divergent	LGTA	325.594	-116.729	1097.32
170427n2	Lumbar	Premotor	divergent	LGTA	423.035	109.091	1097.32
170427n2	Lumbar	Premotor	divergent	LGTA	483.638	189.028	1097.32
170427n2	Lumbar	Premotor	divergent	LGTA	-233.333	-277.989	1157.72
170427n2	Lumbar	Premotor	divergent	LGTA	386.933	170.854	1157.72
170427n2	Lumbar	Premotor	divergent	LGTA	419.964	216.08	1157.72
170427n2	Lumbar	Premotor	divergent	LGTA	548.936	-143.596	1187.92
170427n2	Lumbar	Premotor	divergent	LGTA	145.745	55.9738	1187.92
170427n2	Lumbar	Premotor	divergent	LGTA	148.471	212.737	1218.12
170427n2	Lumbar	Premotor	divergent	LGTA	559.536	-314.619	1248.32
170427n2	Lumbar	Premotor	divergent	LGTA	-250.533	-154.478	1248.32
170427n2	Lumbar	Premotor	divergent	LGTA	408.763	154.777	1248.32
170427n2	Lumbar	Premotor	divergent	LGTA	456.787	193.949	1248.32
170427n2	Lumbar	Premotor	divergent	LGTA	105.314	53.4454	1318.79
170427n2	Lumbar	Premotor	divergent	LGTA	697.087	-280.189	1379.19
170427n2	Lumbar	Premotor	divergent	LGTA	121.811	16.4666	1379.19
170427n2	Lumbar	Premotor	divergent	LGTA	206.772	180.103	1379.19
170427n2	Lumbar	Premotor	divergent	LGTA	-341.28	-145.918	1500
170427n2	Lumbar	Premotor	divergent	LGTA	636.219	-58.6134	1500
170427n2	Lumbar	Premotor	divergent	LGTA	458.216	194.175	1500
170125n3	Lumbar	Premotor	divergent	LGMG	512.861	-168.61	-1467.03
170125n3	Lumbar	Premotor	divergent	LGMG	495.379	-252.136	-1434.07
170125n3	Lumbar	Premotor	divergent	LGMG	563.657	-330.882	-1269.23
170125n3	Lumbar	Premotor	divergent	LGMG	390.361	4.11523	-1236.26
170125n3	Lumbar	Premotor	divergent	LGMG	322.783	-347.68	-1203.3
170125n3	Lumbar	Premotor	divergent	LGMG	274.623	146.197	-1137.36
170125n3	Lumbar	Premotor	divergent	LGMG	-203.625	-326.81	-1005.49
170125n3	Lumbar	Premotor	divergent	LGMG	340.014	-404.878	-972.527
170125n3	Lumbar	Premotor	divergent	LGMG	405.833	-372.055	-708.791
170125n3	Lumbar	Premotor	divergent	LGMG	-155.278	-240.232	-675.824
170125n3	Lumbar	Premotor	divergent	LGMG	-233.819	-190.619	-675.824
170125n3	Lumbar	Premotor	divergent	LGMG	348.575	148.117	-675.824
170125n3	Lumbar	Premotor	divergent	LGMG	321.632	200	-675.824
170125n3	Lumbar	Premotor	divergent	LGMG	362.889	255.23	-675.824
170125n3	Lumbar	Premotor	divergent	LGMG	329.679	-343.015	-609.89
170125n3	Lumbar	Premotor	divergent	LGMG	360.733	-397.674	-543.956
170125n3	Lumbar	Premotor	divergent	LGMG	349.673	96.5723	-543.956
170125n3	Lumbar	Premotor	divergent	LGMG	294.372	210.134	-543.956
170125n3	Lumbar	Premotor	divergent	LGMG	377.072	-409.587	-510.989
170125n3	Lumbar	Premotor	divergent	LGMG	485.704	1.90476	-510.989
170125n3	Lumbar	Premotor	divergent	LGMG	-83.7121	36.0704	-478.022
170125n3	Lumbar	Premotor	divergent	LGMG	-183.312	-307.089	-445.055
170125n3	Lumbar	Premotor	divergent	LGMG	363.968	229.694	-412.088
170125n3	Lumbar	Premotor	divergent	LGMG	366.092	227.526	-379.121
170125n3	Lumbar	Premotor	divergent	LGMG	42.6641	3.74415	-346.154
170125n3	Lumbar	Premotor	divergent	LGMG	316.834	105.831	-313.187
170125n3	Lumbar	Premotor	divergent	LGMG	54.1004	14.2857	-214.286
170125n3	Lumbar	Premotor	divergent	LGMG	190.942	58.0357	-214.286
170125n3	Lumbar	Premotor	divergent	LGMG	-221.99	-262.054	-181.319
170125n3	Lumbar	Premotor	divergent	LGMG	316.365	66.7656	-148.352
170125n3	Lumbar	Premotor	divergent	LGMG	482.763	283.333	-115.385
170125n3	Lumbar	Premotor	divergent	LGMG	-78.2936	-166.342	-82.4176
170125n3	Lumbar	Premotor	divergent	LGMG	163.342	154.03	-82.4176
170125n3	Lumbar	Premotor	divergent	LGMG	323.214	-381.281	-49.4505
170125n3	Lumbar	Premotor	divergent	LGMG	-173.788	-180	-49.4505
170125n3	Lumbar	Premotor	divergent	LGMG	518.75	407.11	-49.4505
170125n3	Lumbar	Premotor	divergent	LGMG	51.7699	-2.11765	16.4835
170125n3	Lumbar	Premotor	divergent	LGMG	41.909	3.18584	16.4835
170125n3	Lumbar	Premotor	divergent	LGMG	327.876	121.062	16.4835
170125n3	Lumbar	Premotor	divergent	LGMG	258.323	-383.333	49.4505
170125n3	Lumbar	Premotor	divergent	LGMG	392.516	234.45	49.4505
170125n3	Lumbar	Premotor	divergent	LGMG	127.57	283.881	148.352
170125n3	Lumbar	Premotor	divergent	LGMG	-140.638	-190.116	247.253
170125n3	Lumbar	Premotor	divergent	LGMG	497.939	261.463	280.22
170125n3	Lumbar	Premotor	divergent	LGMG	179.443	183.228	313.187
170125n3	Lumbar	Premotor	divergent	LGMG	-90.2525	-108.772	379.121
170125n3	Lumbar	Premotor	divergent	LGMG	355.366	-314.573	412.088
170125n3	Lumbar	Premotor	divergent	LGMG	59.0909	8.33333	412.088
170125n3	Lumbar	Premotor	divergent	LGMG	-126.389	-68.75	445.055
170125n3	Lumbar	Premotor	divergent	LGMG	295.921	253.107	510.989
170125n3	Lumbar	Premotor	divergent	LGMG	411.586	-414.527	576.923
170125n3	Lumbar	Premotor	divergent	LGMG	459.913	-135.811	576.923
170125n3	Lumbar	Premotor	divergent	LGMG	400.193	-436.123	609.89
170125n3	Lumbar	Premotor	divergent	LGMG	385.154	291.803	609.89
170125n3	Lumbar	Premotor	divergent	LGMG	325	284.436	642.857
170125n3	Lumbar	Premotor	divergent	LGMG	411.436	366.011	642.857
170125n3	Lumbar	Premotor	divergent	LGMG	391.335	-366.667	675.824
170125n3	Lumbar	Premotor	divergent	LGMG	-157.133	-224.121	675.824
170125n3	Lumbar	Premotor	divergent	LGMG	-157.133	-137.109	675.824
170125n3	Lumbar	Premotor	divergent	LGMG	525.735	-390.397	708.791
170125n3	Lumbar	Premotor	divergent	LGMG	285.896	-166.887	708.791
170125n3	Lumbar	Premotor	divergent	LGMG	-148.924	-157.343	708.791
170125n3	Lumbar	Premotor	divergent	LGMG	360.363	-28.8717	741.758
170125n3	Lumbar	Premotor	divergent	LGMG	296.373	210.101	741.758
170125n3	Lumbar	Premotor	divergent	LGMG	415.56	-379.213	774.725
170125n3	Lumbar	Premotor	divergent	LGMG	65.1693	30.7692	774.725
170125n3	Lumbar	Premotor	divergent	LGMG	316.536	192.308	774.725
170125n3	Lumbar	Premotor	divergent	LGMG	350.119	334.597	807.692
170125n3	Lumbar	Premotor	divergent	LGMG	212.931	66.1562	840.659
170125n3	Lumbar	Premotor	divergent	LGMG	181.712	269.219	840.659
170125n3	Lumbar	Premotor	divergent	LGMG	439.581	-259.412	873.626
170125n3	Lumbar	Premotor	divergent	LGMG	-131.392	-243.267	873.626
170125n3	Lumbar	Premotor	divergent	LGMG	305.832	237.299	873.626
170125n3	Lumbar	Premotor	divergent	LGMG	354.391	297.106	873.626
170125n3	Lumbar	Premotor	divergent	LGMG	344.07	-383.066	906.593
170125n3	Lumbar	Premotor	divergent	LGMG	266.979	127.363	906.593
170125n3	Lumbar	Premotor	divergent	LGMG	469.85	406.965	906.593
170125n3	Lumbar	Premotor	divergent	LGMG	484.457	415.92	906.593
170125n3	Lumbar	Premotor	divergent	LGMG	267.452	192.784	939.56
170125n3	Lumbar	Premotor	divergent	LGMG	236.864	29.5918	1005.49
170125n3	Lumbar	Premotor	divergent	LGMG	411.299	297.959	1005.49
170125n3	Lumbar	Premotor	divergent	LGMG	-43.9655	-6.14035	1038.46
170125n3	Lumbar	Premotor	divergent	LGMG	479.536	80.6557	1038.46
170125n3	Lumbar	Premotor	divergent	LGMG	0.832266	-66.7059	1104.4
170125n3	Lumbar	Premotor	divergent	LGMG	84.0589	58.0311	1104.4
170125n3	Lumbar	Premotor	divergent	LGMG	317.052	198.433	1137.36
170125n3	Lumbar	Premotor	divergent	LGMG	275.543	323.511	1137.36
170125n3	Lumbar	Premotor	divergent	LGMG	325.399	-132.168	1170.33
170125n3	Lumbar	Premotor	divergent	LGMG	436.258	65.28	1170.33
170125n3	Lumbar	Premotor	divergent	LGMG	244.049	275.52	1170.33
170125n3	Lumbar	Premotor	divergent	LGMG	494.722	-125.751	1203.3
170125n3	Lumbar	Premotor	divergent	LGMG	243.75	299.023	1203.3
170125n3	Lumbar	Premotor	divergent	LGMG	347.005	206.344	1269.23
170125n3	Lumbar	Premotor	divergent	LGMG	342.979	152.209	1335.16
170125n3	Lumbar	Premotor	divergent	LGMG	332.837	161.047	1335.16
170125n3	Lumbar	Premotor	divergent	LGMG	177.273	183.362	1368.13
170125n3	Lumbar	Premotor	divergent	LGMG	397.94	237.351	1368.13
170125n3	Lumbar	Premotor	divergent	LGMG	424.343	-152.871	1401.1
170125n3	Lumbar	Premotor	divergent	LGMG	466.598	73.2441	1401.1
170125n3	Lumbar	Premotor	divergent	LGMG	435.131	298.997	1401.1
170125n3	Lumbar	Premotor	divergent	LGMG	-172.961	-254.214	1434.07
170125n3	Lumbar	Premotor	divergent	LGMG	457.916	-182.707	1500
170125n3	Lumbar	Premotor	divergent	LGMG	477.639	-171.429	1500
170125n3	Lumbar	Premotor	divergent	LGMG	-266.325	-166.038	1500
170427n3	Lumbar	Premotor	divergent	LGTA	339.838	218.651	-1327.59
170427n3	Lumbar	Premotor	divergent	LGTA	411.477	72.8376	-1293.1
170427n3	Lumbar	Premotor	divergent	LGTA	212.126	84.2434	-1224.14
170427n3	Lumbar	Premotor	divergent	LGTA	141.837	288.189	-1189.66
170427n3	Lumbar	Premotor	divergent	LGTA	-373.356	-279.139	-1155.17
170427n3	Lumbar	Premotor	divergent	LGTA	-101.198	-228.027	-1051.72
170427n3	Lumbar	Premotor	divergent	LGTA	254.472	152.322	-982.759
170427n3	Lumbar	Premotor	divergent	LGTA	280.205	143.034	-982.759
170427n3	Lumbar	Premotor	divergent	LGTA	273.882	164.396	-948.276
170427n3	Lumbar	Premotor	divergent	LGTA	140.612	223.358	-879.31
170427n3	Lumbar	Premotor	divergent	LGTA	349.165	-195.492	-844.828
170427n3	Lumbar	Premotor	divergent	LGTA	399.469	-178.893	-844.828
170427n3	Lumbar	Premotor	divergent	LGTA	-220.536	-158.369	-775.862
170427n3	Lumbar	Premotor	divergent	LGTA	159.314	244.785	-741.379
170427n3	Lumbar	Premotor	divergent	LGTA	282.213	55.2147	-741.379
170427n3	Lumbar	Premotor	divergent	LGTA	309.524	33.6283	-706.897
170427n3	Lumbar	Premotor	divergent	LGTA	318.122	37.1681	-706.897
170427n3	Lumbar	Premotor	divergent	LGTA	160.414	291.324	-637.931
170427n3	Lumbar	Premotor	divergent	LGTA	315.58	38.9728	-568.966
170427n3	Lumbar	Premotor	divergent	LGTA	385.593	-234.94	-534.483
170427n3	Lumbar	Premotor	divergent	LGTA	334.015	-270.199	-465.517
170427n3	Lumbar	Premotor	divergent	LGTA	339.708	-279.139	-465.517
170427n3	Lumbar	Premotor	divergent	LGTA	413.723	-52.649	-465.517
170427n3	Lumbar	Premotor	divergent	LGTA	375.219	248.71	-396.552
170427n3	Lumbar	Premotor	divergent	LGTA	421.65	46.3023	-362.069
170427n3	Lumbar	Premotor	divergent	LGTA	431.209	54.9839	-362.069
170427n3	Lumbar	Premotor	divergent	LGTA	181.348	217.081	-327.586
170427n3	Lumbar	Premotor	divergent	LGTA	375.94	185.404	-327.586
170427n3	Lumbar	Premotor	divergent	LGTA	257.468	93.7785	-293.103
170427n3	Lumbar	Premotor	divergent	LGTA	483.279	-347.194	-293.103
170427n3	Lumbar	Premotor	divergent	LGTA	292.202	81.9018	-189.655
170427n3	Lumbar	Premotor	divergent	LGTA	428.364	-404.167	-189.655
170427n3	Lumbar	Premotor	divergent	LGTA	141.626	195.455	-155.172
170427n3	Lumbar	Premotor	divergent	LGTA	423.821	118.182	-155.172
170427n3	Lumbar	Premotor	divergent	LGTA	180.504	174.757	-86.2069
170427n3	Lumbar	Premotor	divergent	LGTA	137.994	112.558	-51.7241
170427n3	Lumbar	Premotor	divergent	LGTA	175	157.186	120.69
170427n3	Lumbar	Premotor	divergent	LGTA	86.6032	21.7195	155.172
170427n3	Lumbar	Premotor	divergent	LGTA	208.419	-27.6923	155.172
170427n3	Lumbar	Premotor	divergent	LGTA	427.306	-243.297	155.172
170427n3	Lumbar	Premotor	divergent	LGTA	-76.6611	-163.732	189.655
170427n3	Lumbar	Premotor	divergent	LGTA	419.767	266.462	189.655
170427n3	Lumbar	Premotor	divergent	LGTA	470.833	-363.193	258.621
170427n3	Lumbar	Premotor	divergent	LGTA	481.441	-43.949	293.103
170427n3	Lumbar	Premotor	divergent	LGTA	234.123	179.456	327.586
170427n3	Lumbar	Premotor	divergent	LGTA	325.513	140.483	327.586
170427n3	Lumbar	Premotor	divergent	LGTA	-212.267	-235.032	362.069
170427n3	Lumbar	Premotor	divergent	LGTA	295.268	-32.4236	362.069
170427n3	Lumbar	Premotor	divergent	LGTA	123.5	161.573	396.552
170427n3	Lumbar	Premotor	divergent	LGTA	427.917	0.907716	396.552
170427n3	Lumbar	Premotor	divergent	LGTA	128.583	55.8346	431.034
170427n3	Lumbar	Premotor	divergent	LGTA	265.717	-2.80665	465.517
170427n3	Lumbar	Premotor	divergent	LGTA	128.079	131.546	500
170427n3	Lumbar	Premotor	divergent	LGTA	241.215	106.94	500
170427n3	Lumbar	Premotor	divergent	LGTA	323.399	163.722	500
170427n3	Lumbar	Premotor	divergent	LGTA	324.466	40.694	500
170427n3	Lumbar	Premotor	divergent	LGTA	464.887	-395.187	568.966
170427n3	Lumbar	Premotor	divergent	LGTA	355.925	-128.441	603.448
170427n3	Lumbar	Premotor	divergent	LGTA	261.585	-35.9665	672.414
170427n3	Lumbar	Premotor	divergent	LGTA	399.739	114.662	672.414
170427n3	Lumbar	Premotor	divergent	LGTA	105.814	29.0598	775.862
170427n3	Lumbar	Premotor	divergent	LGTA	-241.944	-233.261	844.828
170427n3	Lumbar	Premotor	divergent	LGTA	207.823	134.954	844.828
170427n3	Lumbar	Premotor	divergent	LGTA	348.703	118.156	948.276
170427n3	Lumbar	Premotor	divergent	LGTA	277.881	151.376	1155.17
170427n3	Lumbar	Premotor	divergent	LGTA	397.103	145.778	1189.66
170427n3	Lumbar	Premotor	divergent	LGTA	319.767	82.3529	1258.62
170427n3	Lumbar	Premotor	divergent	LGTA	340.698	-90	1258.62
170427n3	Lumbar	Premotor	divergent	LGTA	293.064	91.6667	1396.55
170427n3	Lumbar	Premotor	divergent	LGTA	-247.784	-264.838	1465.52
170427n3	Lumbar	Premotor	divergent	LGTA	477.977	183.518	1465.52
