# Supplementary material for: Proximal and distal spinal neurons innervating multiple synergist and antagonist motor pools
Source: eLife. 2021 Nov 2;10:e70858. doi: 10.7554/eLife.70858 (PMC8631798; doi:10.7554/eLife.70858)
Supplement: Figure 1—source data 1. [file elife-70858-fig1-data1.xlsx]

## Sheet: Figure 1C-F
Sample	Part of Spinal Cord	Identity	labelling	Muscles	Medio_Lateral	Dorso_Ventral
170503n6	Lumbar	Premotor	divergent	LGTA	167.424	263.968
170503n6	Lumbar	Premotor	divergent	LGTA	-267.774	-165.904
170503n6	Lumbar	Premotor	divergent	LGTA	-3.27731	-81.5367
170503n6	Lumbar	Premotor	divergent	LGTA	-360.78	-405
170503n6	Lumbar	Premotor	divergent	LGTA	366.436	13.7097
170503n6	Lumbar	Premotor	divergent	LGTA	439.324	137.903
170503n6	Lumbar	Premotor	divergent	LGTA	-162.259	-221.521
170503n6	Lumbar	Premotor	divergent	LGTA	357.252	257.377
170503n6	Lumbar	Premotor	divergent	LGTA	-205.515	-219.458
170503n6	Lumbar	Premotor	divergent	LGTA	-278.162	-279.31
170503n6	Lumbar	Premotor	divergent	LGTA	446.875	97.2752
170503n6	Lumbar	Premotor	divergent	LGTA	432.387	15.8311
170503n6	Lumbar	Premotor	divergent	LGTA	467.394	28.496
170503n6	Lumbar	Premotor	divergent	LGTA	227.074	129.024
170503n6	Lumbar	Premotor	divergent	LGTA	160.844	272.296
170503n6	Lumbar	Premotor	divergent	LGTA	279.118	235.687
170503n6	Lumbar	Premotor	divergent	LGTA	345.074	-435.246
170503n6	Lumbar	Premotor	divergent	LGTA	233.772	214.344
170503n6	Lumbar	Premotor	divergent	LGTA	-267.857	106.296
170503n6	Lumbar	Premotor	divergent	LGTA	297.089	185.526
170503n6	Lumbar	Premotor	divergent	LGTA	254.512	248.684
170503n6	Lumbar	Premotor	divergent	LGTA	219.972	141.495
170503n6	Lumbar	Premotor	divergent	LGTA	265.95	171.649
170503n6	Lumbar	Premotor	divergent	LGTA	305.617	187.887
170503n6	Lumbar	Premotor	divergent	LGTA	315.469	213.178
170503n6	Lumbar	Premotor	divergent	LGTA	291.127	96.8504
170503n6	Lumbar	Premotor	divergent	LGTA	305.775	148.819
170503n6	Lumbar	Premotor	divergent	LGTA	255.423	176.378
170503n6	Lumbar	Premotor	divergent	LGTA	362.535	114.961
170503n6	Lumbar	Premotor	divergent	LGTA	469.02	125.635
170503n6	Lumbar	Premotor	divergent	LGTA	471.569	107.36
170503n6	Lumbar	Premotor	divergent	LGTA	212.418	133.249
170503n6	Lumbar	Premotor	divergent	LGTA	236.988	253.435
170503n6	Lumbar	Premotor	divergent	LGTA	263.158	55.1637
170503n6	Lumbar	Premotor	divergent	LGTA	142.105	306.801
170503n6	Lumbar	Premotor	divergent	LGTA	301.754	-418.02
170503n6	Lumbar	Premotor	divergent	LGTA	256.579	52.4422
170503n6	Lumbar	Premotor	divergent	LGTA	347.507	161.954
170503n6	Lumbar	Premotor	divergent	LGTA	81.9252	247.558
170503n6	Lumbar	Premotor	divergent	LGTA	237.624	131.034
170503n6	Lumbar	Premotor	divergent	LGTA	-460.811	293.154
170503n6	Lumbar	Premotor	divergent	LGTA	398.98	-6.4133
170503n6	Lumbar	Premotor	divergent	LGTA	206.777	75.6688
170503n6	Lumbar	Premotor	divergent	LGTA	480.083	142.93
170503n6	Lumbar	Premotor	divergent	LGTA	462.102	94.7771
170503n6	Lumbar	Premotor	divergent	LGTA	-256.029	-253.069
170503n6	Lumbar	Premotor	divergent	LGTA	261.575	45.4902
170503n6	Lumbar	Premotor	divergent	LGTA	282.571	228.235
170503n6	Lumbar	Premotor	divergent	LGTA	414.67	-114.115
170503n6	Lumbar	Premotor	divergent	LGTA	-130.787	37.5
170503n6	Lumbar	Premotor	divergent	LGTA	523.077	159.894
170503n6	Lumbar	Premotor	divergent	LGTA	539.423	98.153
170503n6	Lumbar	Premotor	divergent	LGTA	373.077	-13.3257
170503n6	Lumbar	Premotor	divergent	LGTA	413.102	246.174
170503n6	Lumbar	Premotor	divergent	LGTA	432.681	-77.3438
170503n6	Lumbar	Premotor	divergent	LGTA	389.82	-3.99113
170503n6	Lumbar	Premotor	divergent	LGTA	372.357	130.769
170503n6	Lumbar	Premotor	divergent	LGTA	256.286	82.3077
170503n6	Lumbar	Premotor	divergent	LGTA	34.3571	2.30769
170503n6	Lumbar	Premotor	divergent	LGTA	-250	-158.232
170503n6	Lumbar	Premotor	divergent	LGTA	42.7143	-3.79747
170503n6	Lumbar	Premotor	divergent	LGTA	-73.8636	48.7874
170503n6	Lumbar	Premotor	divergent	LGTA	172.278	119.843
170503n6	Lumbar	Premotor	divergent	LGTA	374.355	108.094
170503n6	Lumbar	Premotor	divergent	LGTA	417.192	266.319
170503n6	Lumbar	Premotor	divergent	LGTA	-13.7879	-90.9375
170503n6	Lumbar	Premotor	divergent	LGTA	250.861	173.031
170503n6	Lumbar	Premotor	divergent	LGTA	-69.044	-165.682
170503n6	Lumbar	Premotor	divergent	LGTA	292.633	168.194
170503n6	Lumbar	Premotor	divergent	LGTA	195.089	58.221
170503n6	Lumbar	Premotor	divergent	LGTA	350.273	243.396
170503n6	Lumbar	Premotor	divergent	LGTA	188.881	-41.6842
170503n6	Lumbar	Premotor	divergent	LGTA	181.749	107.143
170503n6	Lumbar	Premotor	divergent	LGTA	313.361	-9.8301
170503n6	Lumbar	Premotor	divergent	LGTA	128.156	96.9863
170503n6	Lumbar	Premotor	divergent	LGTA	-255.192	-236.228
170503n6	Lumbar	Premotor	divergent	LGTA	283.697	206.612
170503n6	Lumbar	Premotor	divergent	LGTA	264.465	92.0548
170503n6	Lumbar	Premotor	divergent	LGTA	365.786	204.658
170503n6	Lumbar	Premotor	divergent	LGTA	165.72	276.164
170503n6	Lumbar	Premotor	divergent	LGTA	229.26	129.863
170503n6	Lumbar	Premotor	divergent	LGTA	287.378	191.489
170503n6	Lumbar	Premotor	divergent	LGTA	261.088	51.0638
170503n6	Lumbar	Premotor	divergent	LGTA	414.296	201.702
170503n6	Lumbar	Premotor	divergent	LGTA	174.189	235.294
170503n6	Lumbar	Premotor	divergent	LGTA	314.655	65.6381
170503n6	Lumbar	Premotor	divergent	LGTA	226.724	238.149
170503n6	Lumbar	Premotor	divergent	LGTA	407.759	165.778
170503n6	Lumbar	Premotor	divergent	LGTA	-208.333	-288.833
170503n6	Lumbar	Premotor	divergent	LGTA	268.966	-33.5106
170503n6	Lumbar	Premotor	divergent	LGTA	381.034	-23.9362
170503n6	Lumbar	Premotor	divergent	LGTA	138.569	118.455
170503n6	Lumbar	Premotor	divergent	LGTA	164.095	94.4206
170503n6	Lumbar	Premotor	divergent	LGTA	329.102	138.197
170503n6	Lumbar	Premotor	divergent	LGTA	-362.768	-222.078
170503n6	Lumbar	Premotor	divergent	LGTA	221.258	24.4382
170503n6	Lumbar	Premotor	divergent	LGTA	285.828	128.09
170503n6	Lumbar	Premotor	divergent	LGTA	308.212	158.427
170503n6	Lumbar	Premotor	divergent	LGTA	264.391	45.8874
170503n6	Lumbar	Premotor	divergent	LGTA	266.3	96.9697
170503n6	Lumbar	Premotor	divergent	LGTA	279.662	131.602
170503n6	Lumbar	Premotor	divergent	LGTA	143.172	191.342
170503n6	Lumbar	Premotor	divergent	LGTA	155.58	201.732
170503n6	Lumbar	Premotor	divergent	LGTA	442.878	206.926
170503n6	Lumbar	Premotor	divergent	LGTA	-345.455	-247.5
170503n6	Lumbar	Premotor	divergent	LGTA	143.481	109.483
170503n6	Lumbar	Premotor	divergent	LGTA	436.222	190.517
170503n6	Lumbar	Premotor	divergent	LGTA	225.333	100
170503n6	Lumbar	Premotor	divergent	LGTA	476.985	26.284
170503n6	Lumbar	Premotor	divergent	LGTA	138.603	120.544
170503n6	Lumbar	Premotor	divergent	LGTA	369.926	-63
170503n6	Lumbar	Premotor	divergent	LGTA	365.438	105.495
170503n6	Lumbar	Premotor	divergent	LGTA	15.9754	-90.5325
170503n6	Lumbar	Premotor	divergent	LGTA	522.197	-88.7574
170503n6	Lumbar	Premotor	divergent	LGTA	46.9278	-99.4083
170503n6	Lumbar	Premotor	divergent	LGTA	220.889	195.495
170503n6	Lumbar	Premotor	divergent	LGTA	392.692	244.144
170503n6	Lumbar	Premotor	divergent	LGTA	478.989	317.117
170503n6	Lumbar	Premotor	divergent	LGTA	-240.235	-196.023
170503n6	Lumbar	Premotor	divergent	LGTA	-163.906	-154.261
170503n6	Lumbar	Premotor	divergent	LGTA	-481.912	288.584
170503n6	Lumbar	Premotor	divergent	LGTA	195	239.13
170503n6	Lumbar	Premotor	divergent	LGTA	364.426	120
170503n6	Lumbar	Premotor	divergent	LGTA	687.295	202.609
170503n6	Lumbar	Premotor	divergent	LGTA	-236.933	-308.842
170503n6	Lumbar	Premotor	divergent	LGTA	255.738	-12.4769
170503n6	Lumbar	Premotor	divergent	LGTA	-331.954	-310.758
170503n6	Lumbar	Premotor	divergent	LGTA	-388.743	112.141
170503n6	Lumbar	Premotor	divergent	LGTA	284.153	89.7281
170503n6	Lumbar	Premotor	divergent	LGTA	196.243	137.764
170503n6	Lumbar	Premotor	divergent	LGTA	317.008	193.958
170503n6	Lumbar	Premotor	divergent	LGTA	-244.414	-224.085
170503n6	Lumbar	Premotor	divergent	LGTA	-157.629	-178.354
170503n6	Lumbar	Premotor	divergent	LGTA	-508.659	29.5964
170503n6	Lumbar	Premotor	divergent	LGTA	169.523	253.313
170503n6	Lumbar	Premotor	divergent	LGTA	326.453	154.391
170503n6	Lumbar	Premotor	divergent	LGTA	-387.139	175.953
170503n6	Lumbar	Premotor	divergent	LGTA	1.90896	73.0827
170503n6	Lumbar	Premotor	divergent	LGTA	20.9985	24.3609
170503n6	Lumbar	Premotor	divergent	LGTA	-137.689	-24.1736
170503n6	Lumbar	Premotor	divergent	LGTA	-273.59	-291.942
170503n6	Lumbar	Premotor	divergent	LGTA	333.962	33.0781
170503n6	Lumbar	Premotor	divergent	LGTA	466.038	330.781
170503n6	Lumbar	Premotor	divergent	LGTA	173.585	195.712
170503n6	Lumbar	Premotor	divergent	LGTA	234.906	-240.139
170503n6	Lumbar	Premotor	divergent	LGTA	102.885	21.0526
170503n6	Lumbar	Premotor	divergent	LGTA	369.231	0.956938
170503n6	Lumbar	Premotor	divergent	LGTA	475	49.7608
170503n6	Lumbar	Premotor	divergent	LGTA	6.73077	-105.882
170503n6	Lumbar	Premotor	divergent	LGTA	472.115	-131.373
170503n6	Lumbar	Premotor	divergent	LGTA	504.377	25.966
170503n6	Lumbar	Premotor	divergent	LGTA	483.16	298.609
170503n6	Lumbar	Premotor	divergent	LGTA	514.985	114.992
170503n6	Lumbar	Premotor	divergent	LGTA	255.564	269.861
170503n6	Lumbar	Premotor	divergent	LGTA	489.911	117.774
170503n6	Lumbar	Premotor	divergent	LGTA	-275.283	206.364
170503n6	Lumbar	Premotor	divergent	LGTA	401.187	232.767
170503n6	Lumbar	Premotor	divergent	LGTA	-255.028	-284
170503n6	Lumbar	Premotor	divergent	LGTA	178.412	-68.8578
170503n6	Lumbar	Premotor	divergent	LGTA	205.317	101.422
170503n6	Lumbar	Premotor	divergent	LGTA	461.19	205.687
170503n6	Lumbar	Premotor	divergent	LGTA	441.587	133.649
170503n6	Lumbar	Premotor	divergent	LGTA	293.016	146.919
170503n6	Lumbar	Premotor	divergent	LGTA	0	-99.4186
170503n6	Lumbar	Premotor	divergent	LGTA	518.189	122.542
170503n6	Lumbar	Premotor	divergent	LGTA	118.731	173.374
170503n6	Lumbar	Premotor	divergent	LGTA	493.034	186.082
170503n6	Lumbar	Premotor	divergent	LGTA	378.328	229.652
170503n6	Lumbar	Premotor	divergent	LGTA	364.241	-39.9194
170503n6	Lumbar	Premotor	divergent	LGTA	153.947	-272.177
170503n6	Lumbar	Premotor	divergent	LGTA	-195	-252.714
170503n6	Lumbar	Premotor	divergent	LGTA	-325.844	-201.044
170503n6	Lumbar	Premotor	divergent	LGTA	-200.909	-157.829
170503n6	Lumbar	Premotor	divergent	LGTA	-314.87	59.9049
170503n6	Lumbar	Premotor	divergent	LGTA	337.574	152.381
170503n6	Lumbar	Premotor	divergent	LGTA	391.741	196.19
170503n6	Lumbar	Premotor	divergent	LGTA	427.53	249.524
170503n6	Lumbar	Premotor	divergent	LGTA	397.222	209.955
170503n6	Lumbar	Premotor	divergent	LGTA	257.529	97.7376
170503n6	Lumbar	Premotor	divergent	LGTA	-304.748	-39.9577
170503n6	Lumbar	Premotor	divergent	LGTA	74.1406	86.1027
170503n6	Lumbar	Premotor	divergent	LGTA	362.578	216.616
170503n6	Lumbar	Premotor	divergent	LGTA	430.202	343.769
170503n6	Lumbar	Premotor	divergent	LGTA	311.879	248.875
170503n6	Lumbar	Premotor	divergent	LGTA	296.739	8.68167
170503n6	Lumbar	Premotor	divergent	LGTA	-158.676	-256.542
170503n6	Lumbar	Premotor	divergent	LGTA	409.327	-280
170503n6	Lumbar	Premotor	divergent	LGTA	330.014	54.0098
170503n6	Lumbar	Premotor	divergent	LGTA	333.661	93.2897
170503n6	Lumbar	Premotor	divergent	LGTA	87.1817	30.9179
170503n6	Lumbar	Premotor	divergent	LGTA	455.772	178.744
170503n6	Lumbar	Premotor	divergent	LGTA	296.417	288.963
170503n6	Lumbar	Premotor	divergent	LGTA	454.153	327.09
170503n6	Lumbar	Premotor	divergent	LGTA	562.938	-23.1263
170503n6	Lumbar	Premotor	divergent	LGTA	-207.03	-263.694
170503n6	Lumbar	Premotor	divergent	LGTA	154.338	125.559
170503n6	Lumbar	Premotor	divergent	LGTA	486.758	165.815
170503n6	Lumbar	Premotor	divergent	LGTA	197.869	183.067
170503n6	Lumbar	Premotor	divergent	LGTA	195.89	173.482
170503n6	Lumbar	Premotor	divergent	LGTA	-82.5077	-159.519
170503n6	Lumbar	Premotor	divergent	LGTA	-205.263	-290.481
170503n6	Lumbar	Premotor	divergent	LGTA	546.843	20.339
170503n6	Lumbar	Premotor	divergent	LGTA	450.341	224.653
170503n6	Lumbar	Premotor	divergent	LGTA	245.137	103.544
170503n6	Lumbar	Premotor	divergent	LGTA	-70.4334	-200.835
170503n6	Lumbar	Premotor	divergent	LGTA	611.367	-209.501
170503n6	Lumbar	Premotor	divergent	LGTA	256.909	-29.9287
170503n6	Lumbar	Premotor	divergent	LGTA	85.9584	-9.61995
170503n6	Lumbar	Premotor	divergent	LGTA	440.416	164.356
170503n6	Lumbar	Premotor	divergent	LGTA	371.842	187.129
170503n6	Lumbar	Premotor	divergent	LGTA	667.158	-57.2727
170503n6	Lumbar	Premotor	divergent	LGTA	213.975	286
170503n6	Lumbar	Premotor	divergent	LGTA	232.143	284
170503n6	Lumbar	Premotor	divergent	LGTA	318.944	202
170503n6	Lumbar	Premotor	divergent	LGTA	167.547	144
170503n6	Lumbar	Premotor	divergent	LGTA	-162.003	-237.617
170503n6	Lumbar	Premotor	divergent	LGTA	78.6047	-2.01794
170503n6	Lumbar	Premotor	divergent	LGTA	71.5504	107
170503n6	Lumbar	Premotor	divergent	LGTA	344.651	140
170503n6	Lumbar	Premotor	divergent	LGTA	397.054	222
170503n6	Lumbar	Premotor	divergent	LGTA	626.898	-28.2609
170503n6	Lumbar	Premotor	divergent	LGTA	584.895	49.2147
170503n6	Lumbar	Premotor	divergent	LGTA	468.605	367.652
170503n6	Lumbar	Premotor	divergent	LGTA	363.87	195.023
170503n6	Lumbar	Premotor	divergent	LGTA	-177.188	-173.342
170503n6	Lumbar	Premotor	divergent	LGTA	-140.818	-260.587
170503n6	Lumbar	Premotor	divergent	LGTA	143.082	57.5342
170503n6	Lumbar	Premotor	divergent	LGTA	370.991	263.927
170503n6	Lumbar	Premotor	divergent	LGTA	293.318	41.0959
170503n6	Lumbar	Premotor	divergent	LGTA	344.418	124.201
170503n6	Lumbar	Premotor	divergent	LGTA	583.534	-174.194
170503n6	Lumbar	Premotor	divergent	LGTA	-159.098	-339.919
170503n6	Lumbar	Premotor	divergent	LGTA	476.992	-298.79
170503n6	Lumbar	Premotor	divergent	LGTA	138.797	234.423
170503n6	Lumbar	Premotor	divergent	LGTA	381.203	68.1583
170503n6	Lumbar	Premotor	divergent	LGTA	321.073	13.1455
170503n6	Lumbar	Premotor	divergent	LGTA	366.239	228.169
170503n6	Lumbar	Premotor	divergent	LGTA	-126.568	-287.732
170503n6	Lumbar	Premotor	divergent	LGTA	-253.135	-229.182
170503n6	Lumbar	Premotor	divergent	LGTA	562.24	22.5641
170503n6	Lumbar	Premotor	divergent	LGTA	222.774	124.103
170503n6	Lumbar	Premotor	divergent	LGTA	-197.063	-237.351
170503n6	Lumbar	Premotor	divergent	LGTA	46.3596	73.9599
170503n6	Lumbar	Premotor	divergent	LGTA	161.293	129.43
170503n6	Lumbar	Premotor	divergent	LGTA	168.053	34.2065
170503n6	Lumbar	Premotor	divergent	LGTA	-222.799	-252.857
170503n6	Lumbar	Premotor	divergent	LGTA	294.234	113.154
170503n6	Lumbar	Premotor	divergent	LGTA	374.785	150.238
170503n6	Lumbar	Premotor	divergent	LGTA	-135.67	-167.967
170503n6	Lumbar	Premotor	divergent	LGTA	393.662	254.268
170503n6	Lumbar	Premotor	divergent	LGTA	-112.383	267.528
170503n6	Lumbar	Premotor	divergent	LGTA	388.249	62.8659
170503n6	Lumbar	Premotor	divergent	LGTA	546.856	28.6595
170503n6	Lumbar	Premotor	divergent	LGTA	54.491	28.6595
170503n6	Lumbar	Premotor	divergent	LGTA	557.271	-14.7541
170503n6	Lumbar	Premotor	divergent	LGTA	225.069	248.142
170503n6	Lumbar	Premotor	divergent	LGTA	-224.453	-231.915
170503n6	Lumbar	Premotor	divergent	LGTA	-270.156	-282.979
170503n6	Lumbar	Premotor	divergent	LGTA	518.627	-88.7019
170503n6	Lumbar	Premotor	divergent	LGTA	364.706	139.713
170503n6	Lumbar	Premotor	divergent	LGTA	535.356	-255.118
170503n6	Lumbar	Premotor	divergent	LGTA	-196.201	-143.396
170503n6	Lumbar	Premotor	divergent	LGTA	-260.267	-267.925
170503n6	Lumbar	Premotor	divergent	LGTA	207.201	224.232
170503n6	Lumbar	Premotor	divergent	LGTA	318.689	191.468
170503n6	Lumbar	Premotor	divergent	LGTA	-124.388	-183.817
170503n6	Lumbar	Premotor	divergent	LGTA	83.3333	249.618
170503n6	Lumbar	Premotor	divergent	LGTA	405.556	264.504
170503n6	Lumbar	Premotor	divergent	LGTA	491.111	45.8015
170503n6	Lumbar	Premotor	divergent	LGTA	242.222	95.0382
170503n6	Lumbar	Premotor	divergent	LGTA	461.162	-182.673
170503n6	Lumbar	Premotor	divergent	LGTA	424.388	262.633
170503n6	Lumbar	Premotor	divergent	LGTA	211.697	282.918
170503n6	Lumbar	Premotor	divergent	LGTA	219.648	29.8932
170503n6	Lumbar	Premotor	divergent	LGTA	469.113	4.27046
170503n6	Lumbar	Premotor	divergent	LGTA	320.652	35.8209
170503n6	Lumbar	Premotor	divergent	LGTA	586.957	314.552
170503n6	Lumbar	Premotor	divergent	LGTA	419.565	326.866
170503n6	Lumbar	Premotor	divergent	LGTA	546.517	-166.866
170503n6	Lumbar	Premotor	divergent	LGTA	543.284	-51.6746
170503n6	Lumbar	Premotor	divergent	LGTA	391.294	-330.502
170503n6	Lumbar	Premotor	divergent	LGTA	-215.61	-210.687
170503n6	Lumbar	Premotor	divergent	LGTA	315.837	117.703
170503n6	Lumbar	Premotor	divergent	LGTA	389.138	171.292
170503n6	Lumbar	Premotor	divergent	LGTA	-194.046	-229.412
170503n6	Lumbar	Premotor	divergent	LGTA	594.55	-23.2759
170503n6	Lumbar	Premotor	divergent	LGTA	303.949	255.592
170503n6	Lumbar	Premotor	divergent	LGTA	224.882	149.013
170503n6	Lumbar	Premotor	divergent	LGTA	-263.514	-241.875
170503n6	Lumbar	Premotor	divergent	LGTA	471.844	198.233
170503n6	Lumbar	Premotor	divergent	LGTA	-176.6	-166.525
170503n6	Lumbar	Premotor	divergent	LGTA	-444.737	-12.7119
170503n6	Lumbar	Premotor	divergent	LGTA	-233.001	-245.339
170503n6	Lumbar	Premotor	divergent	LGTA	264.522	79.6875
170503n6	Lumbar	Premotor	divergent	LGTA	370.783	78.5156
170503n6	Lumbar	Premotor	divergent	LGTA	457.761	-114.94
170503n6	Lumbar	Premotor	divergent	LGTA	-256.522	-288.789
170503n6	Lumbar	Premotor	divergent	LGTA	-371.739	-99.7423
170503n6	Lumbar	Premotor	divergent	LGTA	332.435	175.844
170503n6	Lumbar	Premotor	divergent	LGTA	323.938	193.961
170503n6	Lumbar	Premotor	divergent	LGTA	308.007	214.21
170503n6	Lumbar	Premotor	divergent	LGTA	181.618	215.275
170503n6	Lumbar	Premotor	divergent	LGTA	391.816	-140.418
170503n6	Lumbar	Premotor	divergent	LGTA	391.816	-150.369
170503n6	Lumbar	Premotor	divergent	LGTA	316.567	-49.7543
170503n6	Lumbar	Premotor	divergent	LGTA	384.032	36.4865
170503n6	Lumbar	Premotor	divergent	LGTA	137.525	173.311
170503n6	Lumbar	Premotor	divergent	LGTA	156.986	205.743
170503n6	Lumbar	Premotor	divergent	LGTA	215.369	222.973
170503n6	Lumbar	Premotor	divergent	LGTA	290.619	280.743
170503n6	Lumbar	Premotor	divergent	LGTA	77.8443	9.12162
170503n6	Lumbar	Premotor	divergent	LGTA	-451.02	-217.699
170503n6	Lumbar	Premotor	divergent	LGTA	435.343	-20.7524
170503n6	Lumbar	Premotor	divergent	LGTA	596.939	-349.515
170503n6	Lumbar	Premotor	divergent	LGTA	320.779	191.16
170503n6	Lumbar	Premotor	divergent	LGTA	482.749	330.216
170503n6	Lumbar	Premotor	divergent	LGTA	311.696	180.216
170503n6	Lumbar	Premotor	divergent	LGTA	305.994	401.439
170503n6	Lumbar	Premotor	divergent	LGTA	325	410.072
170503n6	Lumbar	Premotor	divergent	LGTA	433.333	-125.357
170503n6	Lumbar	Premotor	divergent	LGTA	640.152	-39.6429
170503n6	Lumbar	Premotor	divergent	LGTA	299.832	437.324
170503n6	Lumbar	Premotor	divergent	LGTA	335.943	211.268
170503n6	Lumbar	Premotor	divergent	LGTA	353.451	192.254
170503n6	Lumbar	Premotor	divergent	LGTA	-196.282	-156.423
170503n6	Lumbar	Premotor	divergent	LGTA	-180.501	-233.501
170503n6	Lumbar	Premotor	divergent	LGTA	281.535	-33.4711
170503n6	Lumbar	Premotor	divergent	LGTA	133.359	55.0173
170503n6	Lumbar	Premotor	divergent	LGTA	313.146	62.2837
170503n6	Lumbar	Premotor	divergent	LGTA	617.5	-197.589
170503n6	Lumbar	Premotor	divergent	LGTA	328.939	179.429
170503n6	Lumbar	Premotor	divergent	LGTA	242.734	-238.958
170503n6	Lumbar	Premotor	divergent	LGTA	275.234	216.341
170503n6	Lumbar	Premotor	divergent	LGTA	491.562	33.0373
170503n6	Lumbar	Premotor	divergent	LGTA	-254.978	-225
170503n6	Lumbar	Premotor	divergent	LGTA	621.37	-168.031
170503n6	Lumbar	Premotor	divergent	LGTA	396.574	291.837
170503n6	Lumbar	Premotor	divergent	LGTA	341	-89.2663
170503n6	Lumbar	Premotor	divergent	LGTA	464	-420.652
170503n6	Lumbar	Premotor	divergent	LGTA	558	59.1241
170503n6	Lumbar	Premotor	divergent	LGTA	435	157.664
170503n6	Lumbar	Premotor	divergent	LGTA	352.128	-121.108
170503n6	Lumbar	Premotor	divergent	LGTA	442.553	-28.496
170503n6	Lumbar	Premotor	divergent	LGTA	268.085	295.082
170503n6	Lumbar	Premotor	divergent	LGTA	295.55	-41.0188
170503n6	Lumbar	Premotor	divergent	LGTA	102.023	78.7234
170503n6	Lumbar	Premotor	divergent	LGTA	564.371	-132.692
170503n6	Lumbar	Premotor	divergent	LGTA	270.509	151.351
170503n6	Lumbar	Premotor	divergent	LGTA	540.84	-216.456
170503n6	Lumbar	Premotor	divergent	LGTA	558.702	-213.038
170503n6	Lumbar	Premotor	divergent	LGTA	552.748	-17.0886
170508n7	Lumbar	Premotor	divergent	LGMG	-214.386	-229.306
170508n7	Lumbar	Premotor	divergent	LGMG	-176.754	-241.148
170508n7	Lumbar	Premotor	divergent	LGMG	-372.295	277.759
170508n7	Lumbar	Premotor	divergent	LGMG	506.693	-279.73
170508n7	Lumbar	Premotor	divergent	LGMG	373.019	48.9185
170508n7	Lumbar	Premotor	divergent	LGMG	307.485	150.502
170508n7	Lumbar	Premotor	divergent	LGMG	474.85	-193.02
170508n7	Lumbar	Premotor	divergent	LGMG	366.805	-51.5854
170508n7	Lumbar	Premotor	divergent	LGMG	306.12	214.145
170508n7	Lumbar	Premotor	divergent	LGMG	281.846	203.289
170508n7	Lumbar	Premotor	divergent	LGMG	-196.809	-177.857
170508n7	Lumbar	Premotor	divergent	LGMG	-218.085	-205.714
170508n7	Lumbar	Premotor	divergent	LGMG	-208.511	-228.214
170508n7	Lumbar	Premotor	divergent	LGMG	-205.44	-259.06
170508n7	Lumbar	Premotor	divergent	LGMG	357.06	104.924
170508n7	Lumbar	Premotor	divergent	LGMG	357.042	-246.477
170508n7	Lumbar	Premotor	divergent	LGMG	387.123	-240.341
170508n7	Lumbar	Premotor	divergent	LGMG	166.097	53.0612
170508n7	Lumbar	Premotor	divergent	LGMG	-370.227	-329.922
170508n7	Lumbar	Premotor	divergent	LGMG	-159.871	-283.29
170508n7	Lumbar	Premotor	divergent	LGMG	486.519	-109.432
170508n7	Lumbar	Premotor	divergent	LGMG	390	209.124
170508n7	Lumbar	Premotor	divergent	LGMG	-305.243	-365.625
170508n7	Lumbar	Premotor	divergent	LGMG	-213.374	-254.207
170508n7	Lumbar	Premotor	divergent	LGMG	-199.544	-197.957
170508n7	Lumbar	Premotor	divergent	LGMG	350	216.799
170508n7	Lumbar	Premotor	divergent	LGMG	341.313	84.7059
170508n7	Lumbar	Premotor	divergent	LGMG	-180.802	-203.294
170508n7	Lumbar	Premotor	divergent	LGMG	-160.836	-190.588
170508n7	Lumbar	Premotor	divergent	LGMG	-276.195	-247.765
170508n7	Lumbar	Premotor	divergent	LGMG	334.924	164.924
170508n7	Lumbar	Premotor	divergent	LGMG	432.48	-45.9397
170508n7	Lumbar	Premotor	divergent	LGMG	395.374	-44.8956
170508n7	Lumbar	Premotor	divergent	LGMG	249.508	6.13288
170508n7	Lumbar	Premotor	divergent	LGMG	-119.132	-63.7339
170508n7	Lumbar	Premotor	divergent	LGMG	332.738	29.5918
170508n7	Lumbar	Premotor	divergent	LGMG	477.183	201.02
170508n7	Lumbar	Premotor	divergent	LGMG	483.631	19.3878
170508n7	Lumbar	Premotor	divergent	LGMG	475.893	-135.301
170508n7	Lumbar	Premotor	divergent	LGMG	370.139	-416.927
170508n7	Lumbar	Premotor	divergent	LGMG	257.692	48.8964
170508n7	Lumbar	Premotor	divergent	LGMG	430.769	156.876
170508n7	Lumbar	Premotor	divergent	LGMG	-344.18	-261.652
170508n7	Lumbar	Premotor	divergent	LGMG	425.641	179.287
170508n7	Lumbar	Premotor	divergent	LGMG	337.179	85.5688
170508n7	Lumbar	Premotor	divergent	LGMG	469.727	-294.479
170508n7	Lumbar	Premotor	divergent	LGMG	111.719	172.487
170508n7	Lumbar	Premotor	divergent	LGMG	411.667	-142.157
170508n7	Lumbar	Premotor	divergent	LGMG	277.843	75.6303
170508n7	Lumbar	Premotor	divergent	LGMG	-209.643	-102.401
170508n7	Lumbar	Premotor	divergent	LGMG	-85.3323	-94.8852
170508n7	Lumbar	Premotor	divergent	LGMG	-239.141	-231.106
170508n7	Lumbar	Premotor	divergent	LGMG	-214.911	-226.409
170508n7	Lumbar	Premotor	divergent	LGMG	334.429	166.107
170508n7	Lumbar	Premotor	divergent	LGMG	412.379	245.638
170508n7	Lumbar	Premotor	divergent	LGMG	-358.583	-214.105
170508n7	Lumbar	Premotor	divergent	LGMG	294.389	182.609
170508n7	Lumbar	Premotor	divergent	LGMG	278.758	42.1405
170508n7	Lumbar	Premotor	divergent	LGMG	453.321	282.594
170508n7	Lumbar	Premotor	divergent	LGMG	545.951	28.6184
170508n7	Lumbar	Premotor	divergent	LGMG	-275.899	-242.872
170508n7	Lumbar	Premotor	divergent	LGMG	12.2411	137.171
170508n7	Lumbar	Premotor	divergent	LGMG	274.2	183.553
170508n7	Lumbar	Premotor	divergent	LGMG	445.678	-265.042
170508n7	Lumbar	Premotor	divergent	LGMG	406.09	202.01
170508n7	Lumbar	Premotor	divergent	LGMG	513.465	230.609
170508n7	Lumbar	Premotor	divergent	LGMG	-148.345	-132.414
170508n7	Lumbar	Premotor	divergent	LGMG	167.351	85.7143
170508n7	Lumbar	Premotor	divergent	LGMG	270.429	179.221
170508n7	Lumbar	Premotor	divergent	LGMG	313.752	3.97351
170508n7	Lumbar	Premotor	divergent	LGMG	323.224	-14.7844
170508n7	Lumbar	Premotor	divergent	LGMG	274.385	46.519
170508n7	Lumbar	Premotor	divergent	LGMG	51.9467	0
170508n7	Lumbar	Premotor	divergent	LGMG	506.148	-43.5484
170508n7	Lumbar	Premotor	divergent	LGMG	-60.9375	-120.349
170508n7	Lumbar	Premotor	divergent	LGMG	519.467	88.2911
170508n7	Lumbar	Premotor	divergent	LGMG	-269.123	-252.532
170508n7	Lumbar	Premotor	divergent	LGMG	585.967	82.3529
170508n7	Lumbar	Premotor	divergent	LGMG	338.29	179.412
170508n7	Lumbar	Premotor	divergent	LGMG	-326.757	65.8784
170508n7	Lumbar	Premotor	divergent	LGMG	-190.901	-200.104
170508n7	Lumbar	Premotor	divergent	LGMG	540.177	-424.442
170508n7	Lumbar	Premotor	divergent	LGMG	390.258	90.5844
170508n7	Lumbar	Premotor	divergent	LGMG	414.811	98.3766
170508n7	Lumbar	Premotor	divergent	LGMG	-254.878	-292.277
170508n7	Lumbar	Premotor	divergent	LGMG	-346.341	-4.45545
170508n7	Lumbar	Premotor	divergent	LGMG	249.088	66.7742
170508n7	Lumbar	Premotor	divergent	LGMG	531.387	186.774
170508n7	Lumbar	Premotor	divergent	LGMG	321.442	0.967742
170508n7	Lumbar	Premotor	divergent	LGMG	-173.738	-195.768
170508n7	Lumbar	Premotor	divergent	LGMG	457.64	-376.931
170508n7	Lumbar	Premotor	divergent	LGMG	403.578	146.535
170508n7	Lumbar	Premotor	divergent	LGMG	514.217	145.545
170508n7	Lumbar	Premotor	divergent	LGMG	291.683	161.386
170508n7	Lumbar	Premotor	divergent	LGMG	284.139	20.7921
170508n7	Lumbar	Premotor	divergent	LGMG	-91.3321	-166.028
170508n7	Lumbar	Premotor	divergent	LGMG	213.729	220.632
170508n7	Lumbar	Premotor	divergent	LGMG	285.339	237.604
170508n7	Lumbar	Premotor	divergent	LGMG	244.576	225.624
170508n7	Lumbar	Premotor	divergent	LGMG	225.434	194.435
170508n7	Lumbar	Premotor	divergent	LGMG	514.74	108.02
170508n7	Lumbar	Premotor	divergent	LGMG	220.63	75.5034
170508n7	Lumbar	Premotor	divergent	LGMG	513.923	301.007
170508n7	Lumbar	Premotor	divergent	LGMG	428.049	-66.5493
170508n7	Lumbar	Premotor	divergent	LGMG	435.976	150
170508n7	Lumbar	Premotor	divergent	LGMG	459.756	158.054
170508n7	Lumbar	Premotor	divergent	LGMG	375.203	-199.648
170508n7	Lumbar	Premotor	divergent	LGMG	-246.25	-290.53
170508n7	Lumbar	Premotor	divergent	LGMG	318.285	-101.395
170508n7	Lumbar	Premotor	divergent	LGMG	408.264	77.0548
170508n7	Lumbar	Premotor	divergent	LGMG	244.421	49.3151
170508n7	Lumbar	Premotor	divergent	LGMG	567.181	-11.5385
170508n7	Lumbar	Premotor	divergent	LGMG	-286.729	-265.992
170508n7	Lumbar	Premotor	divergent	LGMG	117.329	181.347
170508n7	Lumbar	Premotor	divergent	LGMG	380.144	110.881
170508n7	Lumbar	Premotor	divergent	LGMG	605.031	232.836
170508n7	Lumbar	Premotor	divergent	LGMG	461.95	32.8358
170508n7	Lumbar	Premotor	divergent	LGMG	239.832	176.119
170508n7	Lumbar	Premotor	divergent	LGMG	380.189	229.851
170508n7	Lumbar	Premotor	divergent	LGMG	-245.122	-139.852
170508n7	Lumbar	Premotor	divergent	LGMG	415.682	85.0163
170508n7	Lumbar	Premotor	divergent	LGMG	481.874	-434.842
170508n7	Lumbar	Premotor	divergent	LGMG	566.171	-256.754
170508n7	Lumbar	Premotor	divergent	LGMG	483.631	-25.4032
170508n7	Lumbar	Premotor	divergent	LGMG	459.127	178.571
170508n7	Lumbar	Premotor	divergent	LGMG	-249.364	-231.29
170508n7	Lumbar	Premotor	divergent	LGMG	567.771	-35.9281
170508n7	Lumbar	Premotor	divergent	LGMG	371.8	-30
170508n7	Lumbar	Premotor	divergent	LGMG	250.9	21.7391
170508n7	Lumbar	Premotor	divergent	LGMG	-248.083	-113.987
170508n7	Lumbar	Premotor	divergent	LGMG	-174.417	-108.04
170508n7	Lumbar	Premotor	divergent	LGMG	205.4	128.261
170508n7	Lumbar	Premotor	divergent	LGMG	-536.165	249.016
170508n7	Lumbar	Premotor	divergent	LGMG	-447.373	267.263
170508n7	Lumbar	Premotor	divergent	LGMG	270.833	-30.6593
170508n7	Lumbar	Premotor	divergent	LGMG	315.78	32.3741
170508n7	Lumbar	Premotor	divergent	LGMG	296.188	70.1439
170508n7	Lumbar	Premotor	divergent	LGMG	473.67	173.741
170508n7	Lumbar	Premotor	divergent	LGMG	409.131	121.942
170508n7	Lumbar	Premotor	divergent	LGMG	417.199	104.676
170508n7	Lumbar	Premotor	divergent	LGMG	413.741	-76.1538
170508n7	Lumbar	Premotor	divergent	LGMG	413.741	113.309
170508n7	Lumbar	Premotor	divergent	LGMG	333.4	-174.316
170508n7	Lumbar	Premotor	divergent	LGMG	192.545	183.566
170508n7	Lumbar	Premotor	divergent	LGMG	607.98	233.916
170508n7	Lumbar	Premotor	divergent	LGMG	483.232	113.287
170508n7	Lumbar	Premotor	divergent	LGMG	445.152	117.483
170508n7	Lumbar	Premotor	divergent	LGMG	552.828	51.3986
170508n7	Lumbar	Premotor	divergent	LGMG	157.576	175.175
170508n7	Lumbar	Premotor	divergent	LGMG	388.687	82.8671
170508n7	Lumbar	Premotor	divergent	LGMG	458.283	-158.385
170508n7	Lumbar	Premotor	divergent	LGMG	-256.611	-190.068
170508n7	Lumbar	Premotor	divergent	LGMG	336.673	112.892
170508n7	Lumbar	Premotor	divergent	LGMG	492.722	126.481
170508n7	Lumbar	Premotor	divergent	LGMG	394.094	124.429
170508n7	Lumbar	Premotor	divergent	LGMG	410.728	24.2531
170508n7	Lumbar	Premotor	divergent	LGMG	383.858	107.557
170508n7	Lumbar	Premotor	divergent	LGMG	217.52	131.81
170508n7	Lumbar	Premotor	divergent	LGMG	525.886	189.807
170508n7	Lumbar	Premotor	divergent	LGMG	443.996	106.503
170508n7	Lumbar	Premotor	divergent	LGMG	-180.998	-127.195
170508n7	Lumbar	Premotor	divergent	LGMG	-171.768	-209.937
170508n7	Lumbar	Premotor	divergent	LGMG	601.663	-154.688
170508n7	Lumbar	Premotor	divergent	LGMG	-376.13	-83.1081
170508n7	Lumbar	Premotor	divergent	LGMG	-179.837	-210.811
170508n7	Lumbar	Premotor	divergent	LGMG	410.874	99.4536
170508n7	Lumbar	Premotor	divergent	LGMG	-228.977	-171.91
170508n7	Lumbar	Premotor	divergent	LGMG	59.3066	4.28571
170508n7	Lumbar	Premotor	divergent	LGMG	584.744	277.007
170508n7	Lumbar	Premotor	divergent	LGMG	168.898	172.993
170508n7	Lumbar	Premotor	divergent	LGMG	217.972	123.499
170508n7	Lumbar	Premotor	divergent	LGMG	430.723	-211.481
170508n7	Lumbar	Premotor	divergent	LGMG	597.791	54.5455
170508n7	Lumbar	Premotor	divergent	LGMG	373.293	153.345
170508n7	Lumbar	Premotor	divergent	LGMG	396.787	100.858
170508n7	Lumbar	Premotor	divergent	LGMG	-263.578	-209.112
170508n7	Lumbar	Premotor	divergent	LGMG	550.694	126.655
170508n7	Lumbar	Premotor	divergent	LGMG	526.19	125.581
170508n7	Lumbar	Premotor	divergent	LGMG	426.885	158.855
170508n7	Lumbar	Premotor	divergent	LGMG	411.409	156.708
170508n7	Lumbar	Premotor	divergent	LGMG	457.837	42.9338
170508n7	Lumbar	Premotor	divergent	LGMG	545.743	-157.853
170508n7	Lumbar	Premotor	divergent	LGMG	337.228	51.6252
170508n7	Lumbar	Premotor	divergent	LGMG	347.525	84.8948
170508n7	Lumbar	Premotor	divergent	LGMG	370.693	108.987
170508n7	Lumbar	Premotor	divergent	LGMG	565.05	244.359
170508n7	Lumbar	Premotor	divergent	LGMG	499.406	153.728
170508n7	Lumbar	Premotor	divergent	LGMG	-267.442	-184.821
170508n7	Lumbar	Premotor	divergent	LGMG	304.767	-355.47
170508n7	Lumbar	Premotor	divergent	LGMG	481.809	50.3425
170508n7	Lumbar	Premotor	divergent	LGMG	367.996	160.274
170508n7	Lumbar	Premotor	divergent	LGMG	526.96	-133.703
170508n7	Lumbar	Premotor	divergent	LGMG	458.604	-27.9379
170508n7	Lumbar	Premotor	divergent	LGMG	354.207	103.521
170508n7	Lumbar	Premotor	divergent	LGMG	239.866	22.1831
170508n7	Lumbar	Premotor	divergent	LGMG	-306.227	-82.6923
170508n7	Lumbar	Premotor	divergent	LGMG	-88.3613	-125.329
170508n7	Lumbar	Premotor	divergent	LGMG	-257.821	-171.711
170508n7	Lumbar	Premotor	divergent	LGMG	450	156.089
170508n7	Lumbar	Premotor	divergent	LGMG	429.167	-122.198
170508n7	Lumbar	Premotor	divergent	LGMG	423.611	122.878
170508n7	Lumbar	Premotor	divergent	LGMG	460.054	121.111
170508n7	Lumbar	Premotor	divergent	LGMG	401.657	117.153
170508n7	Lumbar	Premotor	divergent	LGMG	159.649	122.628
170508n7	Lumbar	Premotor	divergent	LGMG	503.021	153.285
170508n7	Lumbar	Premotor	divergent	LGMG	394.055	94.1606
170508n7	Lumbar	Premotor	divergent	LGMG	507.853	122.814
170508n7	Lumbar	Premotor	divergent	LGMG	563.152	-413.326
170508n7	Lumbar	Premotor	divergent	LGMG	389.457	125.806
170508n7	Lumbar	Premotor	divergent	LGMG	-231.376	-180.989
170508n7	Lumbar	Premotor	divergent	LGMG	518.539	143.599
170508n7	Lumbar	Premotor	divergent	LGMG	345.693	190.353
170508n7	Lumbar	Premotor	divergent	LGMG	317.697	190.353
170508n7	Lumbar	Premotor	divergent	LGMG	283.614	261.596
170508n7	Lumbar	Premotor	divergent	LGMG	303.09	30.0557
170508n7	Lumbar	Premotor	divergent	LGMG	281.18	-43.0353
170508n7	Lumbar	Premotor	divergent	LGMG	523.263	-125.874
170508n7	Lumbar	Premotor	divergent	LGMG	509.459	211.154
170508n7	Lumbar	Premotor	divergent	LGMG	502.901	148.302
170508n7	Lumbar	Premotor	divergent	LGMG	579.091	-131.095
170508n7	Lumbar	Premotor	divergent	LGMG	650	-79.0289
170508n7	Lumbar	Premotor	divergent	LGMG	-123.702	-183.112
170508n7	Lumbar	Premotor	divergent	LGMG	426.768	0
170508n7	Lumbar	Premotor	divergent	LGMG	-167.561	-229.856
170508n7	Lumbar	Premotor	divergent	LGMG	-303.633	-298.921
170508n7	Lumbar	Premotor	divergent	LGMG	-115.83	-175.899
170508n7	Lumbar	Premotor	divergent	LGMG	444.668	-366.327
170508n7	Lumbar	Premotor	divergent	LGMG	308.652	-135.714
170508n7	Lumbar	Premotor	divergent	LGMG	640.845	-64.2857
170508n7	Lumbar	Premotor	divergent	LGMG	370.121	48.1836
170508n7	Lumbar	Premotor	divergent	LGMG	571.529	172.084
170508n7	Lumbar	Premotor	divergent	LGMG	328.27	195.029
170508n7	Lumbar	Premotor	divergent	LGMG	357.042	195.029
170508n7	Lumbar	Premotor	divergent	LGMG	-258.602	-353.666
170508n7	Lumbar	Premotor	divergent	LGMG	-222.491	-242.815
170508n7	Lumbar	Premotor	divergent	LGMG	473.069	122.449
170508n7	Lumbar	Premotor	divergent	LGMG	382.722	116.883
170508n7	Lumbar	Premotor	divergent	LGMG	235.907	123.562
170508n7	Lumbar	Premotor	divergent	LGMG	506.95	-173.077
170508n7	Lumbar	Premotor	divergent	LGMG	-341.708	-326.361
170508n7	Lumbar	Premotor	divergent	LGMG	-329.851	-190.47
170508n7	Lumbar	Premotor	divergent	LGMG	157.54	188.868
170508n7	Lumbar	Premotor	divergent	LGMG	527.469	249.904
170508n7	Lumbar	Premotor	divergent	LGMG	449.282	-229.072
170508n7	Lumbar	Premotor	divergent	LGMG	-224.545	-79.0842
170508n7	Lumbar	Premotor	divergent	LGMG	677.083	-240.771
170508n7	Lumbar	Premotor	divergent	LGMG	582.292	12.2449
170508n7	Lumbar	Premotor	divergent	LGMG	642.614	299.443
170508n7	Lumbar	Premotor	divergent	LGMG	536.742	-176.636
170508n7	Lumbar	Premotor	divergent	LGMG	397.633	298.33
170508n7	Lumbar	Premotor	divergent	LGMG	660.955	-197.01
170508n7	Lumbar	Premotor	divergent	LGMG	634.176	133.458
170508n7	Lumbar	Premotor	divergent	LGMG	-196.266	-309.591
170508n7	Lumbar	Premotor	divergent	LGMG	544.563	-409.524
170508n7	Lumbar	Premotor	divergent	LGMG	432.175	-58.3333
170508n7	Lumbar	Premotor	divergent	LGMG	505.169	-34.5238
170508n7	Lumbar	Premotor	divergent	LGMG	340.642	-48.8095
170508n7	Lumbar	Premotor	divergent	LGMG	96.1676	-11.9048
170508n7	Lumbar	Premotor	divergent	LGMG	683.176	-155.687
170508n7	Lumbar	Premotor	divergent	LGMG	508.696	110.134
170508n7	Lumbar	Premotor	divergent	LGMG	243.023	210.781
170508n7	Lumbar	Premotor	divergent	LGMG	-241.147	-269.519
170508n7	Lumbar	Premotor	divergent	LGMG	-77.5105	-1.88679
170508n7	Lumbar	Premotor	divergent	LGMG	350.896	118.199
170508n7	Lumbar	Premotor	divergent	LGMG	305.578	219.512
170508n7	Lumbar	Premotor	divergent	LGMG	383.076	-266.873
170508n7	Lumbar	Premotor	divergent	LGMG	615.378	-39.0819
170508n7	Lumbar	Premotor	divergent	LGMG	340.636	60.2362
170508n7	Lumbar	Premotor	divergent	LGMG	332.818	210.236
170508n7	Lumbar	Premotor	divergent	LGMG	629.897	-45.7816
170508n7	Lumbar	Premotor	divergent	LGMG	596.486	-4.5
170508n7	Lumbar	Premotor	divergent	LGMG	495.984	10.609
170508n7	Lumbar	Premotor	divergent	LGMG	522.088	-60.75
170508n7	Lumbar	Premotor	divergent	LGMG	527.309	-82.125
170508n7	Lumbar	Premotor	divergent	LGMG	578.213	84.8723
170508n7	Lumbar	Premotor	divergent	LGMG	-251.734	-286.253
170508n7	Lumbar	Premotor	divergent	LGMG	-142.775	-254.717
170508n7	Lumbar	Premotor	divergent	LGMG	411.708	217.544
170508n7	Lumbar	Premotor	divergent	LGMG	596.721	120.896
170508n7	Lumbar	Premotor	divergent	LGMG	173.536	14.5522
170508n7	Lumbar	Premotor	divergent	LGMG	202.459	-11.0054
170508n7	Lumbar	Premotor	divergent	LGMG	243.56	198.134
170508n7	Lumbar	Premotor	divergent	LGMG	584.877	-55.6818
170508n7	Lumbar	Premotor	divergent	LGMG	-411.858	253.012
170508n7	Lumbar	Premotor	divergent	LGMG	586.585	38.171
170508n7	Lumbar	Premotor	divergent	LGMG	-304.139	21.3439
170508n7	Lumbar	Premotor	divergent	LGMG	327.218	210.909
170508n7	Lumbar	Premotor	divergent	LGMG	463.636	-49.8768
170508n7	Lumbar	Premotor	divergent	LGMG	529.545	266.385
170508n7	Lumbar	Premotor	divergent	LGMG	353.915	160
170508n7	Lumbar	Premotor	divergent	LGMG	346.903	-52.2099
170508n7	Lumbar	Premotor	divergent	LGMG	384.791	-191.436
170508n7	Lumbar	Premotor	divergent	LGMG	652.368	-128.039
170508n7	Lumbar	Premotor	divergent	LGMG	528.051	208.75
170508n7	Lumbar	Premotor	divergent	LGMG	422.678	-7.45856
170508n7	Lumbar	Premotor	divergent	LGMG	438.069	202.5
170508n7	Lumbar	Premotor	divergent	LGMG	155.1	90
170508n7	Lumbar	Premotor	divergent	LGMG	-204.112	-207.994
170508n7	Lumbar	Premotor	divergent	LGMG	406.25	207.353
170508n7	Lumbar	Premotor	divergent	LGMG	560	-18.806
170125n7	Lumbar	Premotor	divergent	TAPL	-204.494	-158.59
170125n7	Lumbar	Premotor	divergent	TAPL	191.176	183.949
170125n7	Lumbar	Premotor	divergent	TAPL	305.882	-321.26
170125n7	Lumbar	Premotor	divergent	TAPL	409.783	78.0096
170125n7	Lumbar	Premotor	divergent	TAPL	433.602	328.492
170125n7	Lumbar	Premotor	divergent	TAPL	428.513	-171.362
170125n7	Lumbar	Premotor	divergent	TAPL	-359.432	-272.334
170125n7	Lumbar	Premotor	divergent	TAPL	280.453	102.107
170125n7	Lumbar	Premotor	divergent	TAPL	336.234	8.75203
170125n7	Lumbar	Premotor	divergent	TAPL	387.366	-171.662
170125n7	Lumbar	Premotor	divergent	TAPL	330.636	-19.1489
170125n7	Lumbar	Premotor	divergent	TAPL	190.839	96.038
170125n7	Lumbar	Premotor	divergent	TAPL	284.823	116.006
170125n7	Lumbar	Premotor	divergent	TAPL	202.617	172.536
170125n7	Lumbar	Premotor	divergent	TAPL	352.146	-143.363
170125n7	Lumbar	Premotor	divergent	TAPL	251.285	153.681
170125n7	Lumbar	Premotor	divergent	TAPL	393.631	70.8589
170125n7	Lumbar	Premotor	divergent	TAPL	-325.374	-265.031
170125n7	Lumbar	Premotor	divergent	TAPL	360.208	-67.8994
170125n7	Lumbar	Premotor	divergent	TAPL	317.107	197.302
170125n7	Lumbar	Premotor	divergent	TAPL	-226.404	-242.734
170125n7	Lumbar	Premotor	divergent	TAPL	322.613	56.3945
170125n7	Lumbar	Premotor	divergent	TAPL	336.157	146.84
170125n7	Lumbar	Premotor	divergent	TAPL	502.436	275.203
170125n7	Lumbar	Premotor	divergent	TAPL	307.966	184.906
170125n7	Lumbar	Premotor	divergent	TAPL	-252.973	-178.188
170125n7	Lumbar	Premotor	divergent	TAPL	523.457	105.822
170125n7	Lumbar	Premotor	divergent	TAPL	59.0909	39.172
170125n7	Lumbar	Premotor	divergent	TAPL	357.428	11.465
170125n7	Lumbar	Premotor	divergent	TAPL	388.531	-23.5714
170125n7	Lumbar	Premotor	divergent	TAPL	-300.845	-248.031
170125n7	Lumbar	Premotor	divergent	TAPL	14.3232	115.461
170125n7	Lumbar	Premotor	divergent	TAPL	249.633	196.382
170125n7	Lumbar	Premotor	divergent	TAPL	97.9452	199.061
170125n7	Lumbar	Premotor	divergent	TAPL	306.45	-377.778
170125n7	Lumbar	Premotor	divergent	TAPL	325	-165.556
170125n7	Lumbar	Premotor	divergent	TAPL	355.422	218.779
170125n7	Lumbar	Premotor	divergent	TAPL	518.872	-54.328
170125n7	Lumbar	Premotor	divergent	TAPL	609.111	-21.5262
170125n7	Lumbar	Premotor	divergent	TAPL	121.613	2.71903
170125n7	Lumbar	Premotor	divergent	TAPL	248.817	231.118
170125n7	Lumbar	Premotor	divergent	TAPL	-89.1877	23.3628
170125n7	Lumbar	Premotor	divergent	TAPL	203.521	112.141
170125n7	Lumbar	Premotor	divergent	TAPL	327.465	107.348
170125n7	Lumbar	Premotor	divergent	TAPL	63.6824	18.8383
170125n7	Lumbar	Premotor	divergent	TAPL	-79.876	-125.348
170125n7	Lumbar	Premotor	divergent	TAPL	354.797	135.225
170125n7	Lumbar	Premotor	divergent	TAPL	32.9203	62.7575
170125n7	Lumbar	Premotor	divergent	TAPL	268.117	185.28
170125n7	Lumbar	Premotor	divergent	TAPL	403.406	285.12
170125n7	Lumbar	Premotor	divergent	TAPL	426.774	-11.4213
170125n7	Lumbar	Premotor	divergent	TAPL	-138.546	-223.797
170125n7	Lumbar	Premotor	divergent	TAPL	40.8183	86.7925
170125n7	Lumbar	Premotor	divergent	TAPL	150.904	60.3774
170125n7	Lumbar	Premotor	divergent	TAPL	311.085	129.245
170125n7	Lumbar	Premotor	divergent	TAPL	233.614	109.091
170125n7	Lumbar	Premotor	divergent	TAPL	237.475	7.79221
170125n7	Lumbar	Premotor	divergent	TAPL	425.396	173.377
170125n7	Lumbar	Premotor	divergent	TAPL	-265.484	-267.056
170125n7	Lumbar	Premotor	divergent	TAPL	71.1538	-5.30973
170125n7	Lumbar	Premotor	divergent	TAPL	228.846	52.8846
170125n7	Lumbar	Premotor	divergent	TAPL	-220.536	-246.923
170125n7	Lumbar	Premotor	divergent	TAPL	252.194	131.633
170125n7	Lumbar	Premotor	divergent	TAPL	449.803	118.671
170125n7	Lumbar	Premotor	divergent	TAPL	-176.33	-284.391
170125n7	Lumbar	Premotor	divergent	TAPL	409.783	262.428
170125n7	Lumbar	Premotor	divergent	TAPL	365.456	-57.5893
170125n7	Lumbar	Premotor	divergent	TAPL	-171.196	-269.776
170125n7	Lumbar	Premotor	divergent	TAPL	403.216	266.779
170125n7	Lumbar	Premotor	divergent	TAPL	-176.784	-239.062
170125n7	Lumbar	Premotor	divergent	TAPL	335.578	165.128
170125n7	Lumbar	Premotor	divergent	TAPL	350.898	-35.0467
170125n7	Lumbar	Premotor	divergent	TAPL	322.286	95.0086
170125n7	Lumbar	Premotor	divergent	TAPL	332.402	130.392
170125n7	Lumbar	Premotor	divergent	TAPL	282.255	-400.139
170125n7	Lumbar	Premotor	divergent	TAPL	290.397	-368.975
170125n7	Lumbar	Premotor	divergent	TAPL	238.901	-6.5407
170125n7	Lumbar	Premotor	divergent	TAPL	-144.287	-260.587
170125n7	Lumbar	Premotor	divergent	TAPL	392.68	192.652
170125n7	Lumbar	Premotor	divergent	TAPL	-127.759	-256.977
170125n7	Lumbar	Premotor	divergent	TAPL	-79.3996	-160.641
170125n7	Lumbar	Premotor	divergent	TAPL	183.333	378.397
170125n7	Lumbar	Premotor	divergent	TAPL	272.667	95.122
170125n7	Lumbar	Premotor	divergent	TAPL	454.667	358.537
170125n7	Lumbar	Premotor	divergent	TAPL	631.776	-61.4826
170125n7	Lumbar	Premotor	divergent	TAPL	270.665	177.202
170125n7	Lumbar	Premotor	divergent	TAPL	95.88	20.0637
170125n7	Lumbar	Premotor	divergent	TAPL	97.2024	42.0382
170125n7	Lumbar	Premotor	divergent	TAPL	382.962	92.1536
170125n7	Lumbar	Premotor	divergent	TAPL	404.352	116.194
170125n7	Lumbar	Premotor	divergent	TAPL	500.265	294.491
170125n7	Lumbar	Premotor	divergent	TAPL	197.503	1.07143
170125n7	Lumbar	Premotor	divergent	TAPL	200.208	221.786
170125n7	Lumbar	Premotor	divergent	TAPL	374.037	140.357
170125n7	Lumbar	Premotor	divergent	TAPL	432.882	189.643
170125n7	Lumbar	Premotor	divergent	TAPL	-176.293	-210.638
170125n7	Lumbar	Premotor	divergent	TAPL	308.8	167.753
170125n7	Lumbar	Premotor	divergent	TAPL	309.461	153.345
170125n7	Lumbar	Premotor	divergent	TAPL	406.002	175.986
170125n7	Lumbar	Premotor	divergent	TAPL	218.268	177.895
170125n7	Lumbar	Premotor	divergent	TAPL	358.976	255.789
170125n7	Lumbar	Premotor	divergent	TAPL	373.39	201.053
170125n7	Lumbar	Premotor	divergent	TAPL	338.441	242.685
170125n7	Lumbar	Premotor	divergent	TAPL	390	206.25
170125n7	Lumbar	Premotor	divergent	TAPL	-258.108	-220.807
170125n7	Lumbar	Premotor	divergent	TAPL	-166.892	-241.77
170125n7	Lumbar	Premotor	divergent	TAPL	379.695	185.143
170125n7	Lumbar	Premotor	divergent	TAPL	384.451	105.143
170125n7	Lumbar	Premotor	divergent	TAPL	228.704	149.721
170125n7	Lumbar	Premotor	divergent	TAPL	407.135	229.05
170125n7	Lumbar	Premotor	divergent	TAPL	140.196	116.87
170125n7	Lumbar	Premotor	divergent	TAPL	529.63	-74.7922
170125n7	Lumbar	Premotor	divergent	TAPL	-326.684	-84.7826
170125n7	Lumbar	Premotor	divergent	TAPL	429.113	223.923
170125n7	Lumbar	Premotor	divergent	TAPL	499.459	222.01
170125n7	Lumbar	Premotor	divergent	TAPL	486.123	326.633
170125n7	Lumbar	Premotor	divergent	TAPL	-150.755	-202.624
170125n7	Lumbar	Premotor	divergent	TAPL	331.331	274.346
170125n7	Lumbar	Premotor	divergent	TAPL	345.4	213.613
170125n7	Lumbar	Premotor	divergent	TAPL	-158.571	-237.611
170125n7	Lumbar	Premotor	divergent	TAPL	154.903	10.772
170125n7	Lumbar	Premotor	divergent	TAPL	-422.758	280.076
170125n7	Lumbar	Premotor	divergent	TAPL	-182.974	-300
170125n7	Lumbar	Premotor	divergent	TAPL	-138.706	-196.364
170125n7	Lumbar	Premotor	divergent	TAPL	115.966	13.7566
170125n7	Lumbar	Premotor	divergent	TAPL	192.784	113.228
170125n7	Lumbar	Premotor	divergent	TAPL	327.216	114.286
170125n7	Lumbar	Premotor	divergent	TAPL	490.455	-14.5161
170125n7	Lumbar	Premotor	divergent	TAPL	366.404	58.8235
170125n7	Lumbar	Premotor	divergent	TAPL	512.965	-169.091
170125n7	Lumbar	Premotor	divergent	TAPL	381.374	296.484
170125n7	Lumbar	Premotor	divergent	TAPL	194.359	33.5484
170125n7	Lumbar	Premotor	divergent	TAPL	231.38	-35.828
170125n7	Lumbar	Premotor	divergent	TAPL	236.364	-53.0255
170125n7	Lumbar	Premotor	divergent	TAPL	257.722	-97.4522
170125n7	Lumbar	Premotor	divergent	TAPL	332.475	153.548
170125n7	Lumbar	Premotor	divergent	TAPL	341.731	211.613
170125n7	Lumbar	Premotor	divergent	TAPL	537.514	295.484
170125n7	Lumbar	Premotor	divergent	TAPL	427.674	16.4534
170125n7	Lumbar	Premotor	divergent	TAPL	444.652	55.9415
170125n7	Lumbar	Premotor	divergent	TAPL	228.571	-38.4956
170125n7	Lumbar	Premotor	divergent	TAPL	419.048	215.575
170125n7	Lumbar	Premotor	divergent	TAPL	440.476	226.195
170125n7	Lumbar	Premotor	divergent	TAPL	-114.884	-240.492
170125n7	Lumbar	Premotor	divergent	TAPL	402.59	140.246
170125n7	Lumbar	Premotor	divergent	TAPL	490.428	-18.5294
170125n7	Lumbar	Premotor	divergent	TAPL	-242.736	-330.723
170125n7	Lumbar	Premotor	divergent	TAPL	254.639	164.189
170125n7	Lumbar	Premotor	divergent	TAPL	286.655	150
170125n7	Lumbar	Premotor	divergent	TAPL	374.513	80.0676
170125n7	Lumbar	Premotor	divergent	TAPL	73.5995	-16.1677
170125n7	Lumbar	Premotor	divergent	TAPL	248.689	69.9454
170125n7	Lumbar	Premotor	divergent	TAPL	326.162	111.475
170125n7	Lumbar	Premotor	divergent	TAPL	-129.261	-294.175
170125n7	Lumbar	Premotor	divergent	TAPL	153.583	222.385
170125n7	Lumbar	Premotor	divergent	TAPL	302.072	89.1743
170125n7	Lumbar	Premotor	divergent	TAPL	427.996	28.6239
170125n7	Lumbar	Premotor	divergent	TAPL	438.186	-81.25
170125n7	Lumbar	Premotor	divergent	TAPL	460.022	15.4128
170125n7	Lumbar	Premotor	divergent	TAPL	412.14	-203.425
170125n7	Lumbar	Premotor	divergent	TAPL	221.329	-162.636
170125n7	Lumbar	Premotor	divergent	TAPL	379.298	128.485
170125n7	Lumbar	Premotor	divergent	TAPL	-232.455	-328.743
170125n7	Lumbar	Premotor	divergent	TAPL	85.9195	-3.71901
170125n7	Lumbar	Premotor	divergent	TAPL	85.9195	17.9577
170125n7	Lumbar	Premotor	divergent	TAPL	407.384	38.5714
170125n7	Lumbar	Premotor	divergent	TAPL	440.64	71.7857
170125n7	Lumbar	Premotor	divergent	TAPL	497.326	-440.847
170125n7	Lumbar	Premotor	divergent	TAPL	568.563	36.9718
170125n7	Lumbar	Premotor	divergent	TAPL	600.69	-193.388
170214n8	Lumbar	Premotor	divergent	TAPL	169.984	164.037
170214n8	Lumbar	Premotor	divergent	TAPL	326.069	9.48617
170214n8	Lumbar	Premotor	divergent	TAPL	431.842	-88.2353
170214n8	Lumbar	Premotor	divergent	TAPL	646.88	-187.5
170214n8	Lumbar	Premotor	divergent	TAPL	-291.269	65.6772
170214n8	Lumbar	Premotor	divergent	TAPL	281.631	77.2532
170214n8	Lumbar	Premotor	divergent	TAPL	479.592	-7.30519
170214n8	Lumbar	Premotor	divergent	TAPL	244.599	20.6452
170214n8	Lumbar	Premotor	divergent	TAPL	-182.092	-193.939
170214n8	Lumbar	Premotor	divergent	TAPL	291.028	252.903
170214n8	Lumbar	Premotor	divergent	TAPL	280.751	28.2927
170214n8	Lumbar	Premotor	divergent	TAPL	307.598	-353.349
170214n8	Lumbar	Premotor	divergent	TAPL	275.758	84.0517
170214n8	Lumbar	Premotor	divergent	TAPL	-269.065	65.4344
170214n8	Lumbar	Premotor	divergent	TAPL	590.828	-226.65
170214n8	Lumbar	Premotor	divergent	TAPL	399.078	-19.2399
170214n8	Lumbar	Premotor	divergent	TAPL	273.261	237.624
170214n8	Lumbar	Premotor	divergent	TAPL	-134.807	-40.8
170214n8	Lumbar	Premotor	divergent	TAPL	235.673	70.0637
170214n8	Lumbar	Premotor	divergent	TAPL	124.488	387.261
170214n8	Lumbar	Premotor	divergent	TAPL	443.787	-150
170214n8	Lumbar	Premotor	divergent	TAPL	502.705	21.6561
170214n8	Lumbar	Premotor	divergent	TAPL	514.108	11.465
170214n8	Lumbar	Premotor	divergent	TAPL	-170.656	-260.024
170214n8	Lumbar	Premotor	divergent	TAPL	-234.234	-250.472
170214n8	Lumbar	Premotor	divergent	TAPL	484.176	53.6779
170214n8	Lumbar	Premotor	divergent	TAPL	247.018	121.788
170214n8	Lumbar	Premotor	divergent	TAPL	275.572	268.739
170214n8	Lumbar	Premotor	divergent	TAPL	333.929	180.776
170214n8	Lumbar	Premotor	divergent	TAPL	169.935	44.1026
170214n8	Lumbar	Premotor	divergent	TAPL	168.235	258.462
170214n8	Lumbar	Premotor	divergent	TAPL	122.045	10.3846
170214n8	Lumbar	Premotor	divergent	TAPL	586.718	115.385
170214n8	Lumbar	Premotor	divergent	TAPL	-178.552	-265.385
170214n8	Lumbar	Premotor	divergent	TAPL	328.138	-45.6683
170214n8	Lumbar	Premotor	divergent	TAPL	305.516	42.6396
170214n8	Lumbar	Premotor	divergent	TAPL	264.988	36.5482
170214n8	Lumbar	Premotor	divergent	TAPL	440.17	-195.983
170214n8	Lumbar	Premotor	divergent	TAPL	339.988	-7.61099
170214n8	Lumbar	Premotor	divergent	TAPL	359.687	291.346
170214n8	Lumbar	Premotor	divergent	TAPL	502.958	-264
170214n8	Lumbar	Premotor	divergent	TAPL	275.232	73.0769
170214n8	Lumbar	Premotor	divergent	TAPL	145.534	175.962
170214n8	Lumbar	Premotor	divergent	TAPL	358.723	262.745
170214n8	Lumbar	Premotor	divergent	TAPL	191.22	0
170214n8	Lumbar	Premotor	divergent	TAPL	436.567	114.467
170214n8	Lumbar	Premotor	divergent	TAPL	493.968	-9.78261
170214n8	Lumbar	Premotor	divergent	TAPL	258.698	63.9706
170214n8	Lumbar	Premotor	divergent	TAPL	174.906	76.1029
170214n8	Lumbar	Premotor	divergent	TAPL	146.433	234.926
170214n8	Lumbar	Premotor	divergent	TAPL	544.243	-184.948
170214n8	Lumbar	Premotor	divergent	TAPL	-56.1211	-208.971
170214n8	Lumbar	Premotor	divergent	TAPL	262.417	63.5161
170214n8	Lumbar	Premotor	divergent	TAPL	391.899	139.509
170214n8	Lumbar	Premotor	divergent	TAPL	450.598	206.427
170214n8	Lumbar	Premotor	divergent	TAPL	-153.518	-111.724
170214n8	Lumbar	Premotor	divergent	TAPL	323.379	177.273
170214n8	Lumbar	Premotor	divergent	TAPL	536.082	-265.468
170214n8	Lumbar	Premotor	divergent	TAPL	260.503	6.88337
170214n8	Lumbar	Premotor	divergent	TAPL	273.165	-18.6207
170214n8	Lumbar	Premotor	divergent	TAPL	167.025	261.407
170214n8	Lumbar	Premotor	divergent	TAPL	102.987	2
170214n8	Lumbar	Premotor	divergent	TAPL	441.136	111.628
170214n8	Lumbar	Premotor	divergent	TAPL	-104.139	-167.246
170214n8	Lumbar	Premotor	divergent	TAPL	310.162	-61.4691
170214n8	Lumbar	Premotor	divergent	TAPL	295.803	-6.95876
170214n8	Lumbar	Premotor	divergent	TAPL	61.2666	3.66599
170214n8	Lumbar	Premotor	divergent	TAPL	421.208	188.187
170214n8	Lumbar	Premotor	divergent	TAPL	236.451	96.5377
170214n8	Lumbar	Premotor	divergent	TAPL	122.973	126.039
170214n8	Lumbar	Premotor	divergent	TAPL	413.3	157.549
170214n8	Lumbar	Premotor	divergent	TAPL	51.7045	12.3596
170214n8	Lumbar	Premotor	divergent	TAPL	341.414	108.989
170214n8	Lumbar	Premotor	divergent	TAPL	110.795	132.584
170214n8	Lumbar	Premotor	divergent	TAPL	271.592	-9.73558
170214n8	Lumbar	Premotor	divergent	TAPL	542.357	-271.514
170214n8	Lumbar	Premotor	divergent	TAPL	363.161	41.1326
170214n8	Lumbar	Premotor	divergent	TAPL	157.677	256.632
170214n8	Lumbar	Premotor	divergent	TAPL	-115.323	-136.792
170214n8	Lumbar	Premotor	divergent	TAPL	307.806	55.4396
170214n8	Lumbar	Premotor	divergent	TAPL	101.667	6.6879
170214n8	Lumbar	Premotor	divergent	TAPL	213.975	-104.63
170214n8	Lumbar	Premotor	divergent	TAPL	319.752	161.311
170214n8	Lumbar	Premotor	divergent	TAPL	331.056	114.098
170214n8	Lumbar	Premotor	divergent	TAPL	261.615	48.1967
170214n8	Lumbar	Premotor	divergent	TAPL	150.994	109.18
170214n8	Lumbar	Premotor	divergent	TAPL	303.272	-84.375
170214n8	Lumbar	Premotor	divergent	TAPL	57.3257	-20.788
170214n8	Lumbar	Premotor	divergent	TAPL	402.205	171.602
170214n8	Lumbar	Premotor	divergent	TAPL	226.529	73.0223
170214n8	Lumbar	Premotor	divergent	TAPL	283.855	-22.0109
170214n8	Lumbar	Premotor	divergent	TAPL	-111.626	-158.974
170214n8	Lumbar	Premotor	divergent	TAPL	49.9289	-37.9076
170214n8	Lumbar	Premotor	divergent	TAPL	35.4686	-54.4146
170214n8	Lumbar	Premotor	divergent	TAPL	428.552	110.843
170214n8	Lumbar	Premotor	divergent	TAPL	198.349	4.95868
170214n8	Lumbar	Premotor	divergent	TAPL	305.68	292.562
170214n8	Lumbar	Premotor	divergent	TAPL	-171.356	-137.966
170214n8	Lumbar	Premotor	divergent	TAPL	65	-1.1509
170214n8	Lumbar	Premotor	divergent	TAPL	366.728	-25.3197
170214n8	Lumbar	Premotor	divergent	TAPL	357.099	46.7532
170214n8	Lumbar	Premotor	divergent	TAPL	368.333	46.7532
170214n8	Lumbar	Premotor	divergent	TAPL	450.988	-447.698
170214n8	Lumbar	Premotor	divergent	TAPL	343.343	-87.3134
170214n8	Lumbar	Premotor	divergent	TAPL	242.75	107.822
170214n8	Lumbar	Premotor	divergent	TAPL	192.955	209.302
170214n8	Lumbar	Premotor	divergent	TAPL	157.387	-22.8169
170214n8	Lumbar	Premotor	divergent	TAPL	200.068	16.4905
170214n8	Lumbar	Premotor	divergent	TAPL	339.672	234.672
170214n8	Lumbar	Premotor	divergent	TAPL	117.373	36.7865
170214n8	Lumbar	Premotor	divergent	TAPL	-307.751	-276.273
170214n8	Lumbar	Premotor	divergent	TAPL	360.682	115.706
170214n8	Lumbar	Premotor	divergent	TAPL	131.321	150
170214n8	Lumbar	Premotor	divergent	TAPL	483.99	-300.593
170214n8	Lumbar	Premotor	divergent	TAPL	327.891	219.318
170214n8	Lumbar	Premotor	divergent	TAPL	338.628	218.182
170214n8	Lumbar	Premotor	divergent	TAPL	237.039	242.045
170214n8	Lumbar	Premotor	divergent	TAPL	-220.874	-191.729
170214n8	Lumbar	Premotor	divergent	TAPL	249.866	24.6407
170214n8	Lumbar	Premotor	divergent	TAPL	131.048	46.8172
170214n8	Lumbar	Premotor	divergent	TAPL	-332.996	-370.505
170214n8	Lumbar	Premotor	divergent	TAPL	288.019	37.2816
170214n8	Lumbar	Premotor	divergent	TAPL	223.628	22.1359
170214n8	Lumbar	Premotor	divergent	TAPL	346.728	149.688
170214n8	Lumbar	Premotor	divergent	TAPL	412.376	209.563
170214n8	Lumbar	Premotor	divergent	TAPL	395.733	-46.0358
170214n8	Lumbar	Premotor	divergent	TAPL	-52.3657	18.038
170214n8	Lumbar	Premotor	divergent	TAPL	241.944	10.8731
170214n8	Lumbar	Premotor	divergent	TAPL	193.556	68.2043
170214n8	Lumbar	Premotor	divergent	TAPL	28.8512	-34.1108
170214n8	Lumbar	Premotor	divergent	TAPL	-230.969	-252.174
170214n8	Lumbar	Premotor	divergent	TAPL	181.316	47.5248
170214n8	Lumbar	Premotor	divergent	TAPL	392.526	271.374
170214n8	Lumbar	Premotor	divergent	TAPL	440.895	345.985
170214n8	Lumbar	Premotor	divergent	TAPL	309.712	142.336
170214n8	Lumbar	Premotor	divergent	TAPL	472.321	-434.4
170214n8	Lumbar	Premotor	divergent	TAPL	137.591	52.514
170214n8	Lumbar	Premotor	divergent	TAPL	406.131	73.743
170214n8	Lumbar	Premotor	divergent	TAPL	599.038	-244.11
170214n8	Lumbar	Premotor	divergent	TAPL	336.538	100.394
170214n8	Lumbar	Premotor	divergent	TAPL	283.873	-12.2356
170214n8	Lumbar	Premotor	divergent	TAPL	471.451	317.647
170214n8	Lumbar	Premotor	divergent	TAPL	231.055	114.286
170214n8	Lumbar	Premotor	divergent	TAPL	403.711	142.857
170214n8	Lumbar	Premotor	divergent	TAPL	-209.518	-283.12
170214n8	Lumbar	Premotor	divergent	TAPL	233.152	206.538
170214n8	Lumbar	Premotor	divergent	TAPL	451.291	147.692
170214n8	Lumbar	Premotor	divergent	TAPL	140.421	13.8462
170214n8	Lumbar	Premotor	divergent	TAPL	-408.3	246.656
170214n8	Lumbar	Premotor	divergent	TAPL	348.593	161.143
170214n8	Lumbar	Premotor	divergent	TAPL	122.081	258.545
170214n8	Lumbar	Premotor	divergent	TAPL	396.764	173.455
170214n8	Lumbar	Premotor	divergent	TAPL	275.176	232.727
170214n8	Lumbar	Premotor	divergent	TAPL	460.759	92.1212
170214n8	Lumbar	Premotor	divergent	TAPL	574.264	-30.1386
170214n8	Lumbar	Premotor	divergent	TAPL	237.196	379.058
170214n8	Lumbar	Premotor	divergent	TAPL	79.3082	144
170214n8	Lumbar	Premotor	divergent	TAPL	240.377	19
170214n8	Lumbar	Premotor	divergent	TAPL	253.459	16
170214n8	Lumbar	Premotor	divergent	TAPL	413.711	181
170214n8	Lumbar	Premotor	divergent	TAPL	111.757	42.4779
170214n8	Lumbar	Premotor	divergent	TAPL	69.8483	0
170214n8	Lumbar	Premotor	divergent	TAPL	517.699	-184.351
170214n8	Lumbar	Premotor	divergent	TAPL	125.901	39.9217
170214n8	Lumbar	Premotor	divergent	TAPL	153.228	32.8767
170214n8	Lumbar	Premotor	divergent	TAPL	-123.208	-269.107
170214n8	Lumbar	Premotor	divergent	TAPL	94.6521	15.8416
170214n8	Lumbar	Premotor	divergent	TAPL	458.183	39.604
170214n8	Lumbar	Premotor	divergent	TAPL	-285.571	-156.189
170214n8	Lumbar	Premotor	divergent	TAPL	437.755	214.712
170214n8	Lumbar	Premotor	divergent	TAPL	216.667	-103.944
170214n8	Lumbar	Premotor	divergent	TAPL	83.0396	19.0678
170214n8	Lumbar	Premotor	divergent	TAPL	405.653	247.881
170214n8	Lumbar	Premotor	divergent	TAPL	244.843	189.344
170214n8	Lumbar	Premotor	divergent	TAPL	140.295	264.529
170214n8	Lumbar	Premotor	divergent	TAPL	203.846	278.182
170214n8	Lumbar	Premotor	divergent	TAPL	234.292	-113.333
170214n8	Lumbar	Premotor	divergent	TAPL	664.586	-297.778
170214n8	Lumbar	Premotor	divergent	TAPL	650.912	-27.7778
170214n8	Lumbar	Premotor	divergent	TAPL	180.335	111.708
170214n8	Lumbar	Premotor	divergent	TAPL	464.71	-82.8645
170214n8	Lumbar	Premotor	divergent	TAPL	346.438	242.328
170214n8	Lumbar	Premotor	divergent	TAPL	526.087	110.383
170214n8	Lumbar	Premotor	divergent	TAPL	395.652	-312.617
170214n8	Lumbar	Premotor	divergent	TAPL	564.13	257.923
170214n8	Lumbar	Premotor	divergent	TAPL	275.654	232.323
170214n8	Lumbar	Premotor	divergent	TAPL	287.379	-83.1378
170214n8	Lumbar	Premotor	divergent	TAPL	335.45	174.894
170214n8	Lumbar	Premotor	divergent	TAPL	307.259	141.27
170214n8	Lumbar	Premotor	divergent	TAPL	454.085	15
170214n8	Lumbar	Premotor	divergent	TAPL	301.142	188.476
170427n2	Lumbar	Premotor	divergent	LGTA	246.161	274.116
170427n2	Lumbar	Premotor	divergent	LGTA	-528.125	70.6408
170427n2	Lumbar	Premotor	divergent	LGTA	555.373	1.66205
170427n2	Lumbar	Premotor	divergent	LGTA	571.77	-312.533
170427n2	Lumbar	Premotor	divergent	LGTA	458.145	-104.83
170427n2	Lumbar	Premotor	divergent	LGTA	114.884	117.666
170427n2	Lumbar	Premotor	divergent	LGTA	122.946	118.639
170427n2	Lumbar	Premotor	divergent	LGTA	74.9605	202.346
170427n2	Lumbar	Premotor	divergent	LGTA	-153.502	-140.146
170427n2	Lumbar	Premotor	divergent	LGTA	393.878	-2.38727
170427n2	Lumbar	Premotor	divergent	LGTA	372.137	-300.668
170427n2	Lumbar	Premotor	divergent	LGTA	175.519	134.954
170427n2	Lumbar	Premotor	divergent	LGTA	232.418	257.143
170427n2	Lumbar	Premotor	divergent	LGTA	341.708	-88.1549
170427n2	Lumbar	Premotor	divergent	LGTA	315.837	-85.0797
170427n2	Lumbar	Premotor	divergent	LGTA	379.262	37.8299
170427n2	Lumbar	Premotor	divergent	LGTA	385.757	293.787
170427n2	Lumbar	Premotor	divergent	LGTA	254.486	60.438
170427n2	Lumbar	Premotor	divergent	LGTA	274.633	107.737
170427n2	Lumbar	Premotor	divergent	LGTA	220.98	48.2861
170427n2	Lumbar	Premotor	divergent	LGTA	66.2669	-23.5808
170427n2	Lumbar	Premotor	divergent	LGTA	302.1	-15.0358
170427n2	Lumbar	Premotor	divergent	LGTA	379.607	17.0404
170427n2	Lumbar	Premotor	divergent	LGTA	504.357	-133.294
170427n2	Lumbar	Premotor	divergent	LGTA	180.705	50.7289
170427n2	Lumbar	Premotor	divergent	LGTA	290.387	76.0933
170427n2	Lumbar	Premotor	divergent	LGTA	324.55	174.927
170427n2	Lumbar	Premotor	divergent	LGTA	241.984	41.9019
170427n2	Lumbar	Premotor	divergent	LGTA	457.955	175
170427n2	Lumbar	Premotor	divergent	LGTA	73.9914	49.6434
170427n2	Lumbar	Premotor	divergent	LGTA	245.389	259.344
170427n2	Lumbar	Premotor	divergent	LGTA	331.556	328.673
170427n2	Lumbar	Premotor	divergent	LGTA	241.838	90.881
170427n2	Lumbar	Premotor	divergent	LGTA	294.412	301.391
170427n2	Lumbar	Premotor	divergent	LGTA	353.676	308.81
170427n2	Lumbar	Premotor	divergent	LGTA	230.274	17.9104
170427n2	Lumbar	Premotor	divergent	LGTA	-121.731	14.2857
170427n2	Lumbar	Premotor	divergent	LGTA	552.928	19.062
170427n2	Lumbar	Premotor	divergent	LGTA	433.016	284.115
170427n2	Lumbar	Premotor	divergent	LGTA	-209.635	-166.882
170427n2	Lumbar	Premotor	divergent	LGTA	261.404	-22.5513
170427n2	Lumbar	Premotor	divergent	LGTA	173.395	81.7391
170427n2	Lumbar	Premotor	divergent	LGTA	149.287	100.87
170427n2	Lumbar	Premotor	divergent	LGTA	249.032	206.987
170427n2	Lumbar	Premotor	divergent	LGTA	250.83	216.594
170427n2	Lumbar	Premotor	divergent	LGTA	350.168	47.3684
170427n2	Lumbar	Premotor	divergent	LGTA	435.519	-422.185
170427n2	Lumbar	Premotor	divergent	LGTA	418.66	-366.556
170427n2	Lumbar	Premotor	divergent	LGTA	326.873	-67.5497
170427n2	Lumbar	Premotor	divergent	LGTA	560.377	-349.436
170427n2	Lumbar	Premotor	divergent	LGTA	227.399	61.2245
170427n2	Lumbar	Premotor	divergent	LGTA	159.434	167.89
170427n2	Lumbar	Premotor	divergent	LGTA	163.208	265.138
170427n2	Lumbar	Premotor	divergent	LGTA	345.283	307.339
170427n2	Lumbar	Premotor	divergent	LGTA	347.17	314.679
170427n2	Lumbar	Premotor	divergent	LGTA	255.325	1.69014
170427n2	Lumbar	Premotor	divergent	LGTA	394.675	316.901
170427n2	Lumbar	Premotor	divergent	LGTA	-160.575	-272.561
170427n2	Lumbar	Premotor	divergent	LGTA	-265.059	-268.902
170427n2	Lumbar	Premotor	divergent	LGTA	322.042	-43.4831
170427n2	Lumbar	Premotor	divergent	LGTA	208.778	239.492
170427n2	Lumbar	Premotor	divergent	LGTA	476.132	18.5022
170427n2	Lumbar	Premotor	divergent	LGTA	267.49	239.648
170427n2	Lumbar	Premotor	divergent	LGTA	270.597	114.155
170427n2	Lumbar	Premotor	divergent	LGTA	285.735	122.374
170427n2	Lumbar	Premotor	divergent	LGTA	142.868	200.913
170427n2	Lumbar	Premotor	divergent	LGTA	118.268	202.74
170427n2	Lumbar	Premotor	divergent	LGTA	344.334	221.645
170427n2	Lumbar	Premotor	divergent	LGTA	68.8982	42.1053
170427n2	Lumbar	Premotor	divergent	LGTA	169.526	50
170427n2	Lumbar	Premotor	divergent	LGTA	282.845	66.6667
170427n2	Lumbar	Premotor	divergent	LGTA	400.697	221.053
170427n2	Lumbar	Premotor	divergent	LGTA	519.456	71.5758
170427n2	Lumbar	Premotor	divergent	LGTA	330.577	246.381
170427n2	Lumbar	Premotor	divergent	LGTA	364.041	306.647
170427n2	Lumbar	Premotor	divergent	LGTA	95.5381	48.1752
170427n2	Lumbar	Premotor	divergent	LGTA	259.318	197.956
170427n2	Lumbar	Premotor	divergent	LGTA	198.753	215.474
170427n2	Lumbar	Premotor	divergent	LGTA	275.525	218.102
170427n2	Lumbar	Premotor	divergent	LGTA	395.566	-418.803
170427n2	Lumbar	Premotor	divergent	LGTA	211.697	118.574
170427n2	Lumbar	Premotor	divergent	LGTA	128.552	225.243
170427n2	Lumbar	Premotor	divergent	LGTA	331.935	-335.56
170427n2	Lumbar	Premotor	divergent	LGTA	94.3101	133.724
170427n2	Lumbar	Premotor	divergent	LGTA	174.227	167.382
170427n2	Lumbar	Premotor	divergent	LGTA	366.642	203.433
170427n2	Lumbar	Premotor	divergent	LGTA	156.897	59.1549
170427n2	Lumbar	Premotor	divergent	LGTA	156.897	68.5446
170427n2	Lumbar	Premotor	divergent	LGTA	382.095	-405.102
170427n2	Lumbar	Premotor	divergent	LGTA	166.014	193.083
170427n2	Lumbar	Premotor	divergent	LGTA	-307.478	-12.4468
170427n2	Lumbar	Premotor	divergent	LGTA	320.907	135.338
170427n2	Lumbar	Premotor	divergent	LGTA	316.038	137.598
170427n2	Lumbar	Premotor	divergent	LGTA	300	169.423
170427n2	Lumbar	Premotor	divergent	LGTA	356.604	239.626
170427n2	Lumbar	Premotor	divergent	LGTA	134.906	247.114
170427n2	Lumbar	Premotor	divergent	LGTA	409.392	180.798
170427n2	Lumbar	Premotor	divergent	LGTA	-407.89	235.683
170427n2	Lumbar	Premotor	divergent	LGTA	380.914	-48.3773
170427n2	Lumbar	Premotor	divergent	LGTA	60.2823	21.2703
170427n2	Lumbar	Premotor	divergent	LGTA	289.18	153.323
170427n2	Lumbar	Premotor	divergent	LGTA	253.36	246.381
170427n2	Lumbar	Premotor	divergent	LGTA	440.227	-74.1419
170427n2	Lumbar	Premotor	divergent	LGTA	622.23	-181.957
170427n2	Lumbar	Premotor	divergent	LGTA	617.891	-171.196
170427n2	Lumbar	Premotor	divergent	LGTA	183.111	33.8415
170427n2	Lumbar	Premotor	divergent	LGTA	347.997	101.524
170427n2	Lumbar	Premotor	divergent	LGTA	302.87	227.744
170427n2	Lumbar	Premotor	divergent	LGTA	323.698	313.72
170427n2	Lumbar	Premotor	divergent	LGTA	157.638	222.595
170427n2	Lumbar	Premotor	divergent	LGTA	209.843	251.908
170427n2	Lumbar	Premotor	divergent	LGTA	472.92	-264.089
170427n2	Lumbar	Premotor	divergent	LGTA	647.879	-146.822
170427n2	Lumbar	Premotor	divergent	LGTA	169.657	211.268
170427n2	Lumbar	Premotor	divergent	LGTA	524.602	62.6003
170427n2	Lumbar	Premotor	divergent	LGTA	289.912	275.441
170427n2	Lumbar	Premotor	divergent	LGTA	355.051	128.91
170427n2	Lumbar	Premotor	divergent	LGTA	280.479	190.521
170427n2	Lumbar	Premotor	divergent	LGTA	262.671	192.417
170427n2	Lumbar	Premotor	divergent	LGTA	162.5	196.209
170427n2	Lumbar	Premotor	divergent	LGTA	325.594	-116.729
170427n2	Lumbar	Premotor	divergent	LGTA	423.035	109.091
170427n2	Lumbar	Premotor	divergent	LGTA	483.638	189.028
170427n2	Lumbar	Premotor	divergent	LGTA	-233.333	-277.989
170427n2	Lumbar	Premotor	divergent	LGTA	386.933	170.854
170427n2	Lumbar	Premotor	divergent	LGTA	419.964	216.08
170427n2	Lumbar	Premotor	divergent	LGTA	548.936	-143.596
170427n2	Lumbar	Premotor	divergent	LGTA	145.745	55.9738
170427n2	Lumbar	Premotor	divergent	LGTA	148.471	212.737
170427n2	Lumbar	Premotor	divergent	LGTA	559.536	-314.619
170427n2	Lumbar	Premotor	divergent	LGTA	-250.533	-154.478
170427n2	Lumbar	Premotor	divergent	LGTA	408.763	154.777
170427n2	Lumbar	Premotor	divergent	LGTA	456.787	193.949
170427n2	Lumbar	Premotor	divergent	LGTA	105.314	53.4454
170427n2	Lumbar	Premotor	divergent	LGTA	697.087	-280.189
170427n2	Lumbar	Premotor	divergent	LGTA	121.811	16.4666
170427n2	Lumbar	Premotor	divergent	LGTA	206.772	180.103
170427n2	Lumbar	Premotor	divergent	LGTA	-341.28	-145.918
170427n2	Lumbar	Premotor	divergent	LGTA	636.219	-58.6134
170427n2	Lumbar	Premotor	divergent	LGTA	458.216	194.175
170125n3	Lumbar	Premotor	divergent	LGMG	512.861	-168.61
170125n3	Lumbar	Premotor	divergent	LGMG	495.379	-252.136
170125n3	Lumbar	Premotor	divergent	LGMG	563.657	-330.882
170125n3	Lumbar	Premotor	divergent	LGMG	390.361	4.11523
170125n3	Lumbar	Premotor	divergent	LGMG	322.783	-347.68
170125n3	Lumbar	Premotor	divergent	LGMG	274.623	146.197
170125n3	Lumbar	Premotor	divergent	LGMG	-203.625	-326.81
170125n3	Lumbar	Premotor	divergent	LGMG	340.014	-404.878
170125n3	Lumbar	Premotor	divergent	LGMG	405.833	-372.055
170125n3	Lumbar	Premotor	divergent	LGMG	-155.278	-240.232
170125n3	Lumbar	Premotor	divergent	LGMG	-233.819	-190.619
170125n3	Lumbar	Premotor	divergent	LGMG	348.575	148.117
170125n3	Lumbar	Premotor	divergent	LGMG	321.632	200
170125n3	Lumbar	Premotor	divergent	LGMG	362.889	255.23
170125n3	Lumbar	Premotor	divergent	LGMG	329.679	-343.015
170125n3	Lumbar	Premotor	divergent	LGMG	360.733	-397.674
170125n3	Lumbar	Premotor	divergent	LGMG	349.673	96.5723
170125n3	Lumbar	Premotor	divergent	LGMG	294.372	210.134
170125n3	Lumbar	Premotor	divergent	LGMG	377.072	-409.587
170125n3	Lumbar	Premotor	divergent	LGMG	485.704	1.90476
170125n3	Lumbar	Premotor	divergent	LGMG	-83.7121	36.0704
170125n3	Lumbar	Premotor	divergent	LGMG	-183.312	-307.089
170125n3	Lumbar	Premotor	divergent	LGMG	363.968	229.694
170125n3	Lumbar	Premotor	divergent	LGMG	366.092	227.526
170125n3	Lumbar	Premotor	divergent	LGMG	42.6641	3.74415
170125n3	Lumbar	Premotor	divergent	LGMG	316.834	105.831
170125n3	Lumbar	Premotor	divergent	LGMG	54.1004	14.2857
170125n3	Lumbar	Premotor	divergent	LGMG	190.942	58.0357
170125n3	Lumbar	Premotor	divergent	LGMG	-221.99	-262.054
170125n3	Lumbar	Premotor	divergent	LGMG	316.365	66.7656
170125n3	Lumbar	Premotor	divergent	LGMG	482.763	283.333
170125n3	Lumbar	Premotor	divergent	LGMG	-78.2936	-166.342
170125n3	Lumbar	Premotor	divergent	LGMG	163.342	154.03
170125n3	Lumbar	Premotor	divergent	LGMG	323.214	-381.281
170125n3	Lumbar	Premotor	divergent	LGMG	-173.788	-180
170125n3	Lumbar	Premotor	divergent	LGMG	518.75	407.11
170125n3	Lumbar	Premotor	divergent	LGMG	51.7699	-2.11765
170125n3	Lumbar	Premotor	divergent	LGMG	41.909	3.18584
170125n3	Lumbar	Premotor	divergent	LGMG	327.876	121.062
170125n3	Lumbar	Premotor	divergent	LGMG	258.323	-383.333
170125n3	Lumbar	Premotor	divergent	LGMG	392.516	234.45
170125n3	Lumbar	Premotor	divergent	LGMG	127.57	283.881
170125n3	Lumbar	Premotor	divergent	LGMG	-140.638	-190.116
170125n3	Lumbar	Premotor	divergent	LGMG	497.939	261.463
170125n3	Lumbar	Premotor	divergent	LGMG	179.443	183.228
170125n3	Lumbar	Premotor	divergent	LGMG	-90.2525	-108.772
170125n3	Lumbar	Premotor	divergent	LGMG	355.366	-314.573
170125n3	Lumbar	Premotor	divergent	LGMG	59.0909	8.33333
170125n3	Lumbar	Premotor	divergent	LGMG	-126.389	-68.75
170125n3	Lumbar	Premotor	divergent	LGMG	295.921	253.107
170125n3	Lumbar	Premotor	divergent	LGMG	411.586	-414.527
170125n3	Lumbar	Premotor	divergent	LGMG	459.913	-135.811
170125n3	Lumbar	Premotor	divergent	LGMG	400.193	-436.123
170125n3	Lumbar	Premotor	divergent	LGMG	385.154	291.803
170125n3	Lumbar	Premotor	divergent	LGMG	325	284.436
170125n3	Lumbar	Premotor	divergent	LGMG	411.436	366.011
170125n3	Lumbar	Premotor	divergent	LGMG	391.335	-366.667
170125n3	Lumbar	Premotor	divergent	LGMG	-157.133	-224.121
170125n3	Lumbar	Premotor	divergent	LGMG	-157.133	-137.109
170125n3	Lumbar	Premotor	divergent	LGMG	525.735	-390.397
170125n3	Lumbar	Premotor	divergent	LGMG	285.896	-166.887
170125n3	Lumbar	Premotor	divergent	LGMG	-148.924	-157.343
170125n3	Lumbar	Premotor	divergent	LGMG	360.363	-28.8717
170125n3	Lumbar	Premotor	divergent	LGMG	296.373	210.101
170125n3	Lumbar	Premotor	divergent	LGMG	415.56	-379.213
170125n3	Lumbar	Premotor	divergent	LGMG	65.1693	30.7692
170125n3	Lumbar	Premotor	divergent	LGMG	316.536	192.308
170125n3	Lumbar	Premotor	divergent	LGMG	350.119	334.597
170125n3	Lumbar	Premotor	divergent	LGMG	212.931	66.1562
170125n3	Lumbar	Premotor	divergent	LGMG	181.712	269.219
170125n3	Lumbar	Premotor	divergent	LGMG	439.581	-259.412
170125n3	Lumbar	Premotor	divergent	LGMG	-131.392	-243.267
170125n3	Lumbar	Premotor	divergent	LGMG	305.832	237.299
170125n3	Lumbar	Premotor	divergent	LGMG	354.391	297.106
170125n3	Lumbar	Premotor	divergent	LGMG	344.07	-383.066
170125n3	Lumbar	Premotor	divergent	LGMG	266.979	127.363
170125n3	Lumbar	Premotor	divergent	LGMG	469.85	406.965
170125n3	Lumbar	Premotor	divergent	LGMG	484.457	415.92
170125n3	Lumbar	Premotor	divergent	LGMG	267.452	192.784
170125n3	Lumbar	Premotor	divergent	LGMG	236.864	29.5918
170125n3	Lumbar	Premotor	divergent	LGMG	411.299	297.959
170125n3	Lumbar	Premotor	divergent	LGMG	-43.9655	-6.14035
170125n3	Lumbar	Premotor	divergent	LGMG	479.536	80.6557
170125n3	Lumbar	Premotor	divergent	LGMG	0.832266	-66.7059
170125n3	Lumbar	Premotor	divergent	LGMG	84.0589	58.0311
170125n3	Lumbar	Premotor	divergent	LGMG	317.052	198.433
170125n3	Lumbar	Premotor	divergent	LGMG	275.543	323.511
170125n3	Lumbar	Premotor	divergent	LGMG	325.399	-132.168
170125n3	Lumbar	Premotor	divergent	LGMG	436.258	65.28
170125n3	Lumbar	Premotor	divergent	LGMG	244.049	275.52
170125n3	Lumbar	Premotor	divergent	LGMG	494.722	-125.751
170125n3	Lumbar	Premotor	divergent	LGMG	243.75	299.023
170125n3	Lumbar	Premotor	divergent	LGMG	347.005	206.344
170125n3	Lumbar	Premotor	divergent	LGMG	342.979	152.209
170125n3	Lumbar	Premotor	divergent	LGMG	332.837	161.047
170125n3	Lumbar	Premotor	divergent	LGMG	177.273	183.362
170125n3	Lumbar	Premotor	divergent	LGMG	397.94	237.351
170125n3	Lumbar	Premotor	divergent	LGMG	424.343	-152.871
170125n3	Lumbar	Premotor	divergent	LGMG	466.598	73.2441
170125n3	Lumbar	Premotor	divergent	LGMG	435.131	298.997
170125n3	Lumbar	Premotor	divergent	LGMG	-172.961	-254.214
170125n3	Lumbar	Premotor	divergent	LGMG	457.916	-182.707
170125n3	Lumbar	Premotor	divergent	LGMG	477.639	-171.429
170125n3	Lumbar	Premotor	divergent	LGMG	-266.325	-166.038
170427n3	Lumbar	Premotor	divergent	LGTA	339.838	218.651
170427n3	Lumbar	Premotor	divergent	LGTA	411.477	72.8376
170427n3	Lumbar	Premotor	divergent	LGTA	212.126	84.2434
170427n3	Lumbar	Premotor	divergent	LGTA	141.837	288.189
170427n3	Lumbar	Premotor	divergent	LGTA	-373.356	-279.139
170427n3	Lumbar	Premotor	divergent	LGTA	-101.198	-228.027
170427n3	Lumbar	Premotor	divergent	LGTA	254.472	152.322
170427n3	Lumbar	Premotor	divergent	LGTA	280.205	143.034
170427n3	Lumbar	Premotor	divergent	LGTA	273.882	164.396
170427n3	Lumbar	Premotor	divergent	LGTA	140.612	223.358
170427n3	Lumbar	Premotor	divergent	LGTA	349.165	-195.492
170427n3	Lumbar	Premotor	divergent	LGTA	399.469	-178.893
170427n3	Lumbar	Premotor	divergent	LGTA	-220.536	-158.369
170427n3	Lumbar	Premotor	divergent	LGTA	159.314	244.785
170427n3	Lumbar	Premotor	divergent	LGTA	282.213	55.2147
170427n3	Lumbar	Premotor	divergent	LGTA	309.524	33.6283
170427n3	Lumbar	Premotor	divergent	LGTA	318.122	37.1681
170427n3	Lumbar	Premotor	divergent	LGTA	160.414	291.324
170427n3	Lumbar	Premotor	divergent	LGTA	315.58	38.9728
170427n3	Lumbar	Premotor	divergent	LGTA	385.593	-234.94
170427n3	Lumbar	Premotor	divergent	LGTA	334.015	-270.199
170427n3	Lumbar	Premotor	divergent	LGTA	339.708	-279.139
170427n3	Lumbar	Premotor	divergent	LGTA	413.723	-52.649
170427n3	Lumbar	Premotor	divergent	LGTA	375.219	248.71
170427n3	Lumbar	Premotor	divergent	LGTA	421.65	46.3023
170427n3	Lumbar	Premotor	divergent	LGTA	431.209	54.9839
170427n3	Lumbar	Premotor	divergent	LGTA	181.348	217.081
170427n3	Lumbar	Premotor	divergent	LGTA	375.94	185.404
170427n3	Lumbar	Premotor	divergent	LGTA	257.468	93.7785
170427n3	Lumbar	Premotor	divergent	LGTA	483.279	-347.194
170427n3	Lumbar	Premotor	divergent	LGTA	292.202	81.9018
170427n3	Lumbar	Premotor	divergent	LGTA	428.364	-404.167
170427n3	Lumbar	Premotor	divergent	LGTA	141.626	195.455
170427n3	Lumbar	Premotor	divergent	LGTA	423.821	118.182
170427n3	Lumbar	Premotor	divergent	LGTA	180.504	174.757
170427n3	Lumbar	Premotor	divergent	LGTA	137.994	112.558
170427n3	Lumbar	Premotor	divergent	LGTA	175	157.186
170427n3	Lumbar	Premotor	divergent	LGTA	86.6032	21.7195
170427n3	Lumbar	Premotor	divergent	LGTA	208.419	-27.6923
170427n3	Lumbar	Premotor	divergent	LGTA	427.306	-243.297
170427n3	Lumbar	Premotor	divergent	LGTA	-76.6611	-163.732
170427n3	Lumbar	Premotor	divergent	LGTA	419.767	266.462
170427n3	Lumbar	Premotor	divergent	LGTA	470.833	-363.193
170427n3	Lumbar	Premotor	divergent	LGTA	481.441	-43.949
170427n3	Lumbar	Premotor	divergent	LGTA	234.123	179.456
170427n3	Lumbar	Premotor	divergent	LGTA	325.513	140.483
170427n3	Lumbar	Premotor	divergent	LGTA	-212.267	-235.032
170427n3	Lumbar	Premotor	divergent	LGTA	295.268	-32.4236
170427n3	Lumbar	Premotor	divergent	LGTA	123.5	161.573
170427n3	Lumbar	Premotor	divergent	LGTA	427.917	0.907716
170427n3	Lumbar	Premotor	divergent	LGTA	128.583	55.8346
170427n3	Lumbar	Premotor	divergent	LGTA	265.717	-2.80665
170427n3	Lumbar	Premotor	divergent	LGTA	128.079	131.546
170427n3	Lumbar	Premotor	divergent	LGTA	241.215	106.94
170427n3	Lumbar	Premotor	divergent	LGTA	323.399	163.722
170427n3	Lumbar	Premotor	divergent	LGTA	324.466	40.694
170427n3	Lumbar	Premotor	divergent	LGTA	464.887	-395.187
170427n3	Lumbar	Premotor	divergent	LGTA	355.925	-128.441
170427n3	Lumbar	Premotor	divergent	LGTA	261.585	-35.9665
170427n3	Lumbar	Premotor	divergent	LGTA	399.739	114.662
170427n3	Lumbar	Premotor	divergent	LGTA	105.814	29.0598
170427n3	Lumbar	Premotor	divergent	LGTA	-241.944	-233.261
170427n3	Lumbar	Premotor	divergent	LGTA	207.823	134.954
170427n3	Lumbar	Premotor	divergent	LGTA	348.703	118.156
170427n3	Lumbar	Premotor	divergent	LGTA	277.881	151.376
170427n3	Lumbar	Premotor	divergent	LGTA	397.103	145.778
170427n3	Lumbar	Premotor	divergent	LGTA	319.767	82.3529
170427n3	Lumbar	Premotor	divergent	LGTA	340.698	-90
170427n3	Lumbar	Premotor	divergent	LGTA	293.064	91.6667
170427n3	Lumbar	Premotor	divergent	LGTA	-247.784	-264.838
170427n3	Lumbar	Premotor	divergent	LGTA	477.977	183.518

## Sheet: Figure 1G
Animal	Muscles injected	ventral-ipsi-eGFP	ventral-contra-eGFP	dorsal-ipsi-eGFP	dorsal-contra-eGFP	ventral-ipsi-mCherry	ventral-contra-mCherry	dorsal-ipsi-mCherry	dorsal-contra-mCherry	ventral-ipsi-div	ventral-contra-div	dorsal-ipsi-div	dorsal-contra-div
170125n3	LMGS	136	44	313	6	152	147	345	44	15	7	25	1
170508n7	LMGS	480	187	735	42	321	221	589	51	28	21	53	1
170125n7	TAPL	208	111	484	24	167	133	365	26	14	10	35	1
170214n8	TAPL	142	49	410	7	233	82	480	33	17	8	40	0
170427n2	TAGS	121	53	264	11	108	30	389	6	11	5	34	2
170427n3	TAGS	136	50	240	9	62	15	154	4	10	2	17	0
170503n6	TAGS	345	222	726	72	228	111	744	35	25	14	83	3
