# Supplementary material for: Proximal and distal spinal neurons innervating multiple synergist and antagonist motor pools
Source: eLife. 2021 Nov 2;10:e70858. doi: 10.7554/eLife.70858 (PMC8631798; doi:10.7554/eLife.70858)
Supplement: Figure 2—figure supplement 4—source data 1. [file elife-70858-fig2-figsupp4-data1.xlsx]

## Sheet: Figure 2-figure supplement 4
Sample	Part of Spinal Cord	Identity	labelling	Muscles	Medio_Lateral	Dorso_Ventral	Rostro-caudal
170503n6	thoracic	Premotor	eGFP	LG	347.484	176.88	-2500
170503n6	thoracic	Premotor	eGFP	LG	276.38	31.3077	-2467.46
170503n6	thoracic	Premotor	eGFP	LG	300.221	234.385	-2467.46
170503n6	thoracic	Premotor	eGFP	LG	230.103	-163.273	-2434.91
170503n6	thoracic	Premotor	eGFP	LG	4.12371	-113.66	-2434.91
170503n6	thoracic	Premotor	eGFP	LG	-119.171	-64.5455	-2402.37
170503n6	thoracic	Premotor	eGFP	LG	148.696	79.0572	-2402.37
170503n6	thoracic	Premotor	eGFP	LG	-98.8662	-56.2648	-2369.82
170503n6	thoracic	Premotor	eGFP	LG	-164.172	-12.4113	-2369.82
170503n6	thoracic	Premotor	eGFP	LG	346.269	208.682	-2369.82
170503n6	thoracic	Premotor	eGFP	LG	-107.654	-89.1055	-2337.28
170503n6	thoracic	Premotor	eGFP	LG	138.596	48.0092	-2272.19
170503n6	thoracic	Premotor	eGFP	LG	-69.6104	-113.613	-2239.64
170503n6	thoracic	Premotor	eGFP	LG	273.286	-2.05882	-2239.64
170503n6	thoracic	Premotor	eGFP	LG	388.785	206.045	-2207.1
170503n6	thoracic	Premotor	eGFP	LG	137.688	162.462	-2174.56
170503n6	thoracic	Premotor	eGFP	LG	279.787	2.38095	-2142.01
170503n6	thoracic	Premotor	eGFP	LG	-180.577	-143.684	-2109.47
170503n6	thoracic	Premotor	eGFP	LG	326.034	-95.4545	-2109.47
170503n6	thoracic	Premotor	eGFP	LG	293.917	24.4444	-2109.47
170503n6	thoracic	Premotor	eGFP	LG	236.496	66.8148	-2109.47
170503n6	thoracic	Premotor	eGFP	LG	-152.381	-180.947	-2076.92
170503n6	thoracic	Premotor	eGFP	LG	-183.375	-199.5	-2044.38
170503n6	thoracic	Premotor	eGFP	LG	-156.171	-159.25	-2044.38
170503n6	thoracic	Premotor	eGFP	LG	377.551	100	-2044.38
170503n6	thoracic	Premotor	eGFP	LG	-97.3822	-31.25	-2011.83
170503n6	thoracic	Premotor	eGFP	LG	-89.5522	-73.2143	-1979.29
170503n6	thoracic	Premotor	eGFP	LG	-207.33	-278.429	-1946.75
170503n6	thoracic	Premotor	eGFP	LG	28.3465	-32.4438	-1946.75
170503n6	thoracic	Premotor	eGFP	LG	302.362	183.333	-1946.75
170503n6	thoracic	Premotor	eGFP	LG	333.858	285.386	-1946.75
170503n6	thoracic	Premotor	eGFP	LG	-190.933	-83.4152	-1914.2
170503n6	thoracic	Premotor	eGFP	LG	307.368	185.691	-1881.66
170503n6	thoracic	Premotor	eGFP	LG	-157.412	-91.8033	-1849.11
170503n6	thoracic	Premotor	eGFP	LG	-119.171	-161.08	-1816.57
170503n6	thoracic	Premotor	eGFP	LG	203.675	-64.6307	-1816.57
170503n6	thoracic	Premotor	eGFP	LG	-103.627	240.625	-1816.57
170503n6	thoracic	Premotor	eGFP	LG	274.687	-73.0061	-1718.93
170503n6	thoracic	Premotor	eGFP	LG	189.474	-63.3436	-1718.93
170503n6	thoracic	Premotor	eGFP	LG	331.83	-18.2515	-1718.93
170503n6	thoracic	Premotor	eGFP	LG	-193.064	-185.733	-1686.39
170503n6	thoracic	Premotor	eGFP	LG	321.693	15.9677	-1686.39
170503n6	thoracic	Premotor	eGFP	LG	281.934	-116.022	-1653.85
170503n6	thoracic	Premotor	eGFP	LG	-13.8728	53.0888	-1653.85
170503n6	thoracic	Premotor	eGFP	LG	276.845	110	-1653.85
170503n6	thoracic	Premotor	eGFP	LG	11.1801	-168.481	-1621.3
170503n6	thoracic	Premotor	eGFP	LG	331.677	146.727	-1621.3
170503n6	thoracic	Premotor	eGFP	LG	-258.462	173.796	-1621.3
170503n6	thoracic	Premotor	eGFP	LG	-100	-65.1961	-1588.76
170503n6	thoracic	Premotor	eGFP	LG	187.258	-28.9174	-1588.76
170503n6	thoracic	Premotor	eGFP	LG	315.789	156.759	-1588.76
170503n6	thoracic	Premotor	eGFP	LG	100	-119.583	-1523.67
170503n6	thoracic	Premotor	eGFP	LG	-258.892	-132.789	-1491.12
170503n6	thoracic	Premotor	eGFP	LG	277.477	-119.412	-1491.12
170503n6	thoracic	Premotor	eGFP	LG	-115.452	-116.08	-1491.12
170503n6	thoracic	Premotor	eGFP	LG	-76.9679	0	-1491.12
170503n6	thoracic	Premotor	eGFP	LG	276.276	148.824	-1491.12
170503n6	thoracic	Premotor	eGFP	LG	245.455	128.744	-1458.58
170503n6	thoracic	Premotor	eGFP	LG	-161.755	-82.1333	-1393.49
170503n6	thoracic	Premotor	eGFP	LG	261.318	252.124	-1360.95
170503n6	thoracic	Premotor	eGFP	LG	-290.446	-91.875	-1068.05
170503n6	thoracic	Premotor	eGFP	LG	38.4181	42.8442	-1068.05
170503n6	thoracic	Premotor	eGFP	LG	-194.562	-148.537	-1035.5
170503n6	thoracic	Premotor	eGFP	LG	259.88	-41.922	-1035.5
170503n6	thoracic	Premotor	eGFP	LG	383.481	168.486	-1002.96
170503n6	thoracic	Premotor	eGFP	LG	-100.599	-147.036	-970.414
170503n6	thoracic	Premotor	eGFP	LG	233.245	-132.923	-937.87
170503n6	thoracic	Premotor	eGFP	LG	-282.635	-143.87	-905.325
170503n6	thoracic	Premotor	eGFP	LG	20.3593	-186.602	-872.781
170503n6	thoracic	Premotor	eGFP	LG	287.24	-19.943	-775.148
170503n6	thoracic	Premotor	eGFP	LG	-114.286	-85.4962	-710.059
170503n6	thoracic	Premotor	eGFP	LG	-26.5896	-24.0196	-677.515
170503n6	thoracic	Premotor	eGFP	LG	152.436	-16.8449	-644.97
170503n6	thoracic	Premotor	eGFP	LG	117.26	-284.254	-612.426
170503n6	thoracic	Premotor	eGFP	LG	-63.2836	-55.7007	-579.882
170503n6	thoracic	Premotor	eGFP	LG	-268.404	-132.878	-189.349
170503n6	thoracic	Premotor	eGFP	LG	-74.2671	-24.3176	-189.349
170503n6	thoracic	Premotor	eGFP	LG	90.4762	-18.3727	-156.805
170503n6	thoracic	Premotor	eGFP	LG	-144.706	-126.034	-124.26
170503n6	thoracic	Premotor	eGFP	LG	-121.176	-1.70316	-124.26
170503n6	thoracic	Premotor	eGFP	LG	206.414	-171.373	-26.6272
170503n6	thoracic	Premotor	eGFP	LG	-172.581	20.4064	5.91716
170503n6	thoracic	Premotor	eGFP	LG	310.345	126.521	71.0059
170503n6	thoracic	Premotor	eGFP	LG	294.253	151.616	71.0059
170503n6	thoracic	Premotor	eGFP	LG	323.692	164.179	136.095
170503n6	thoracic	Premotor	eGFP	LG	-123.529	-101.866	168.639
170503n6	thoracic	Premotor	eGFP	LG	-20.9913	-11.519	201.183
170503n6	thoracic	Premotor	eGFP	LG	-139.938	-213.747	233.728
170503n6	thoracic	Premotor	eGFP	LG	-164.706	-91.9708	233.728
170503n6	thoracic	Premotor	eGFP	LG	-186.35	-268.56	526.627
170503n6	thoracic	Premotor	eGFP	LG	257.963	180.136	591.716
170503n6	thoracic	Premotor	eGFP	LG	248.593	-75	624.26
170503n6	thoracic	Premotor	eGFP	LG	253.018	114.835	1535.5
170503n6	thoracic	Premotor	eGFP	LG	-156.568	-243.205	1633.14
170503n6	thoracic	Premotor	eGFP	LG	316.962	142.342	1665.68
170503n6	thoracic	Premotor	eGFP	LG	-228.261	-130.31	1698.22
170503n6	thoracic	Premotor	eGFP	LG	311.346	-79.0049	1698.22
170503n6	thoracic	Premotor	eGFP	LG	-114.416	-168.686	2023.67
170503n6	thoracic	Premotor	eGFP	LG	40.0911	-34.125	2056.21
170503n6	thoracic	Premotor	eGFP	LG	336.522	209.115	2674.56
170503n6	thoracic	Premotor	eGFP	LG	-184.816	-144.29	3000
170503n6	thoracic	Premotor	eGFP	LG	-109.347	-52.4609	non available
170503n6	thoracic	Premotor	eGFP	LG	-163.91	-238.443	non available
170427n2	thoracic	Premotor	eGFP	LG	-133.913	-242.793	-2500
170427n2	thoracic	Premotor	eGFP	LG	359.56	-107.902	-2429.49
170427n2	thoracic	Premotor	eGFP	LG	-327.619	253.267	-2382.48
170427n2	thoracic	Premotor	eGFP	LG	345.669	124.631	-2311.97
170427n2	thoracic	Premotor	eGFP	LG	-302.646	12.32	-2194.44
170427n2	thoracic	Premotor	eGFP	LG	-309.845	-21.0383	-2170.94
170427n2	thoracic	Premotor	eGFP	LG	140.215	34.2593	-2147.44
170427n2	thoracic	Premotor	eGFP	LG	-303.485	72.3214	-2076.92
170427n2	thoracic	Premotor	eGFP	LG	-161.538	-112.037	-1935.9
170427n2	thoracic	Premotor	eGFP	LG	175.584	63.0208	-1865.38
170427n2	thoracic	Premotor	eGFP	LG	328.177	54.2517	-1818.38
170427n2	thoracic	Premotor	eGFP	LG	217.68	15.9014	-1818.38
170427n2	thoracic	Premotor	eGFP	LG	-217.08	-91.9492	-1700.85
170427n2	thoracic	Premotor	eGFP	LG	29.0503	-90.785	-1677.35
170427n2	thoracic	Premotor	eGFP	LG	-233.735	-116.338	-1677.35
170427n2	thoracic	Premotor	eGFP	LG	70.0809	13	-1536.32
170427n2	thoracic	Premotor	eGFP	LG	-90.4762	-26.3006	-1473.65
170427n2	thoracic	Premotor	eGFP	LG	-138.012	-71.8182	-1230.77
170427n2	thoracic	Premotor	eGFP	LG	89.8876	110.199	-1136.75
170427n2	thoracic	Premotor	eGFP	LG	268.889	26.9811	-1113.25
170427n2	thoracic	Premotor	eGFP	LG	30.4762	3.94265	-878.205
170427n2	thoracic	Premotor	eGFP	LG	-13.2931	227.894	-784.188
170427n2	thoracic	Premotor	eGFP	LG	-156.522	-30.9451	-619.658
170427n2	thoracic	Premotor	eGFP	LG	-19.1693	-37.9404	-267.094
170427n2	thoracic	Premotor	eGFP	LG	18.0282	52.2727	61.9658
170427n2	thoracic	Premotor	eGFP	LG	-18.1269	60.3792	85.4701
170427n2	thoracic	Premotor	eGFP	LG	368.652	163.081	931.624
170427n2	thoracic	Premotor	eGFP	LG	105.775	58.2627	1049.15
170427n2	thoracic	Premotor	eGFP	LG	301.655	171.429	2247.86
170427n2	thoracic	Premotor	eGFP	LG	-110.983	-23.3957	-1042.74
170427n2	thoracic	Premotor	eGFP	LG	91.018	23.9965	-995.726
170427n3	thoracic	Premotor	eGFP	LG	348.255	78.4426	-2430.96
170427n3	thoracic	Premotor	eGFP	LG	265.298	-48.6111	-2430.96
170427n3	thoracic	Premotor	eGFP	LG	297.804	-70.4082	-2407.95
170427n3	thoracic	Premotor	eGFP	LG	266.165	135.955	-2384.94
170427n3	thoracic	Premotor	eGFP	LG	361.654	35.313	-2384.94
170427n3	thoracic	Premotor	eGFP	LG	412.782	8.82825	-2384.94
170427n3	thoracic	Premotor	eGFP	LG	386.233	10.2484	-2361.92
170427n3	thoracic	Premotor	eGFP	LG	220.043	78.5714	-2269.87
170427n3	thoracic	Premotor	eGFP	LG	-193.135	-161.609	-2269.87
170427n3	thoracic	Premotor	eGFP	LG	-275.991	17.134	-2223.85
170427n3	thoracic	Premotor	eGFP	LG	148.046	144.597	-2154.81
170427n3	thoracic	Premotor	eGFP	LG	-151.02	-120.942	-2085.77
170427n3	thoracic	Premotor	eGFP	LG	127.094	141.79	-2039.75
170427n3	thoracic	Premotor	eGFP	LG	385.93	30.3448	-2016.74
170427n3	thoracic	Premotor	eGFP	LG	-227.762	-66.8975	-1993.72
170427n3	thoracic	Premotor	eGFP	LG	375.49	-4.80769	-1947.7
170427n3	thoracic	Premotor	eGFP	LG	220.649	296.154	-1901.67
170427n3	thoracic	Premotor	eGFP	LG	69.6165	30.3512	-1901.67
170427n3	thoracic	Premotor	eGFP	LG	52.3364	-163	-1625.52
170427n3	thoracic	Premotor	eGFP	LG	267.442	159.736	-1579.5
170427n3	thoracic	Premotor	eGFP	LG	267.119	62.037	-1487.45
170427n3	thoracic	Premotor	eGFP	LG	-142.765	-98.3471	-1487.45
170427n3	thoracic	Premotor	eGFP	LG	-136.338	-97.3829	-1464.44
170427n3	thoracic	Premotor	eGFP	LG	137.024	125.926	-1326.36
170427n3	thoracic	Premotor	eGFP	LG	315.278	53.3118	-1280.33
170427n3	thoracic	Premotor	eGFP	LG	138.065	-181.213	-1142.26
170427n3	thoracic	Premotor	eGFP	LG	319.218	123.152	-958.159
170427n3	thoracic	Premotor	eGFP	LG	215.385	-152.537	-612.971
170427n3	thoracic	Premotor	eGFP	LG	327.397	181.278	-566.946
170427n3	thoracic	Premotor	eGFP	LG	82.4324	196.882	-336.82
170427n3	thoracic	Premotor	eGFP	LG	219.737	74.1304	1089.96
170427n3	thoracic	Premotor	eGFP	LG	-165.753	-96.3483	1251.05
170427n3	thoracic	Premotor	eGFP	LG	-211.321	252.421	1665.27
170503n6	thoracic	Premotor	divergent	LGTA	253.422	197.154	-2467.46
170503n6	thoracic	Premotor	divergent	LGTA	383.505	260	-2434.91
170503n6	thoracic	Premotor	divergent	LGTA	365.217	174.266	-2402.37
170503n6	thoracic	Premotor	divergent	LGTA	-214.423	-59.6692	-2272.19
170503n6	thoracic	Premotor	divergent	LGTA	355.231	221.63	-2109.47
170503n6	thoracic	Premotor	divergent	LGTA	261.224	200.945	-2076.92
170503n6	thoracic	Premotor	divergent	LGTA	405.698	2.5741	-2011.83
170503n6	thoracic	Premotor	divergent	LGTA	308.832	220.515	-2011.83
170503n6	thoracic	Premotor	divergent	LGTA	-188.482	-66.3342	-1946.75
170503n6	thoracic	Premotor	divergent	LGTA	-180.267	-97.1744	-1914.2
170503n6	thoracic	Premotor	divergent	LGTA	274.737	173.312	-1881.66
170503n6	thoracic	Premotor	divergent	LGTA	-290.027	-163.525	-1849.11
170503n6	thoracic	Premotor	divergent	LGTA	273.791	129.25	-1653.85
170503n6	thoracic	Premotor	divergent	LGTA	261.364	128.238	-1523.67
170503n6	thoracic	Premotor	divergent	LGTA	322.727	-57.8261	-1458.58
170503n6	thoracic	Premotor	divergent	LGTA	284.663	188.571	-1393.49
170503n6	thoracic	Premotor	divergent	LGTA	-176.774	-61.25	-1198.22
170503n6	thoracic	Premotor	divergent	LGTA	302.065	173.327	-1002.96
170503n6	thoracic	Premotor	divergent	LGTA	316.914	169.459	-775.148
170503n6	thoracic	Premotor	divergent	LGTA	315.663	174.483	-710.059
170503n6	thoracic	Premotor	divergent	LGTA	252.381	-47.769	-156.805
170503n6	thoracic	Premotor	divergent	LGTA	-14.5455	-42.7873	-156.805
170503n6	thoracic	Premotor	divergent	LGTA	244.248	196.986	5.91716
170503n6	thoracic	Premotor	divergent	LGTA	324.786	185.688	103.55
170503n6	thoracic	Premotor	divergent	LGTA	172.08	301.743	103.55
170503n6	thoracic	Premotor	divergent	LGTA	289.474	-25.9591	331.361
170503n6	thoracic	Premotor	divergent	LGTA	332.632	160.374	331.361
170503n6	thoracic	Premotor	divergent	LGTA	224.924	201.534	396.45
170503n6	thoracic	Premotor	divergent	LGTA	307.527	167.021	721.893
170503n6	thoracic	Premotor	divergent	LGTA	44.6927	69.8895	819.527
170503n6	thoracic	Premotor	divergent	LGTA	-188.166	-146.588	884.615
170503n6	thoracic	Premotor	divergent	LGTA	307.104	161.704	982.249
170503n6	thoracic	Premotor	divergent	LGTA	-128.492	-156.279	1047.34
170503n6	thoracic	Premotor	divergent	LGTA	259.2	180.769	1144.97
170503n6	thoracic	Premotor	divergent	LGTA	53.3333	248.356	1210.06
170503n6	thoracic	Premotor	divergent	LGTA	318.325	169.527	1437.87
170503n6	thoracic	Premotor	divergent	LGTA	297.382	181.086	1437.87
170503n6	thoracic	Premotor	divergent	LGTA	283.544	-71.5328	1665.68
170503n6	thoracic	Premotor	divergent	LGTA	300.971	101.61	1991.12
170503n6	thoracic	Premotor	divergent	LGTA	376.201	159.304	2316.57
170503n6	thoracic	Premotor	divergent	LGTA	221.296	313.313	2479.29
170503n6	thoracic	Premotor	divergent	LGTA	307.477	183.962	2642.01
170503n6	thoracic	Premotor	divergent	LGTA	303.215	83.4421	non available
170503n6	thoracic	Premotor	divergent	LGTA	118.443	251.224	non available
170503n6	thoracic	Premotor	divergent	LGTA	-182.752	-147.578	non available
170427n2	thoracic	Premotor	divergent	LGTA	-153.776	-269.377	-2452.99
170427n2	thoracic	Premotor	divergent	LGTA	-225.121	-113.514	-2405.98
170427n2	thoracic	Premotor	divergent	LGTA	391.367	-4.19162	-2076.92
170427n2	thoracic	Premotor	divergent	LGTA	-218.076	-138.56	-1982.91
170427n2	thoracic	Premotor	divergent	LGTA	179.104	106.716	-1959.4
170427n2	thoracic	Premotor	divergent	LGTA	364.179	10.0332	-1959.4
170427n2	thoracic	Premotor	divergent	LGTA	271.468	109.369	-1230.77
170427n2	thoracic	Premotor	divergent	LGTA	301.911	2.11946	-596.154
170427n2	thoracic	Premotor	divergent	LGTA	274.052	191.128	-972.222
170427n3	thoracic	Premotor	divergent	LGTA	305.263	6.17978	-2384.94
170427n3	thoracic	Premotor	divergent	LGTA	254.618	178.355	-2315.9
170427n3	thoracic	Premotor	divergent	LGTA	230.805	153.468	-2154.81
170427n3	thoracic	Premotor	divergent	LGTA	364.103	21.3247	-1924.69
170427n3	thoracic	Premotor	divergent	LGTA	333.564	97.9296	-405.858
170503n6	thoracic	Premotor	mCherry	TA	42.8884	-86.409	-2500
170503n6	thoracic	Premotor	mCherry	TA	247.702	151.36	-2500
170503n6	thoracic	Premotor	mCherry	TA	163.676	205.04	-2500
170503n6	thoracic	Premotor	mCherry	TA	-143.891	-79.0588	-2467.46
170503n6	thoracic	Premotor	mCherry	TA	170.419	56.6923	-2467.46
170503n6	thoracic	Premotor	mCherry	TA	-98.6175	-142.298	-2434.91
170503n6	thoracic	Premotor	mCherry	TA	379.13	-28.8915	-2402.37
170503n6	thoracic	Premotor	mCherry	TA	-97.4093	24.6858	-2402.37
170503n6	thoracic	Premotor	mCherry	TA	242.609	110.51	-2402.37
170503n6	thoracic	Premotor	mCherry	TA	341.309	-24.7059	-2337.28
170503n6	thoracic	Premotor	mCherry	TA	238.375	11.3905	-2304.73
170503n6	thoracic	Premotor	mCherry	TA	329.078	-123.529	-2239.64
170503n6	thoracic	Premotor	mCherry	TA	371.631	45.0431	-2239.64
170125n3	thoracic	Premotor	eGFP	LG	-93.4673	-202.632	-1834.68
170125n3	thoracic	Premotor	eGFP	LG	-108.543	-205.144	-1834.68
170125n3	thoracic	Premotor	eGFP	LG	255.502	178.983	-1790.32
170125n3	thoracic	Premotor	eGFP	LG	-228.959	-211.649	-1612.9
170125n3	thoracic	Premotor	eGFP	LG	-69.3333	-115.678	-1568.55
170125n3	thoracic	Premotor	eGFP	LG	313.002	202.844	-1391.13
170125n3	thoracic	Premotor	eGFP	LG	-138.865	-144.275	-1391.13
170125n3	thoracic	Premotor	eGFP	LG	-9.24855	-60.2828	-1302.42
170125n3	thoracic	Premotor	eGFP	LG	-114.121	8.38095	-1258.06
170125n3	thoracic	Premotor	eGFP	LG	-18.8976	-113.636	-1080.65
170125n3	thoracic	Premotor	eGFP	LG	-72.0721	-175.507	-1036.29
170125n3	thoracic	Premotor	eGFP	LG	355.432	184.418	-991.935
170125n3	thoracic	Premotor	eGFP	LG	140.434	150.84	-770.161
170125n3	thoracic	Premotor	eGFP	LG	-21.9653	-47.3624	-415.323
170125n3	thoracic	Premotor	eGFP	LG	-83.0769	-9.57711	-370.968
170125n3	thoracic	Premotor	eGFP	LG	52.8846	-106.599	-370.968
170125n3	thoracic	Premotor	eGFP	LG	-101.01	-56.9575	-193.548
170125n3	thoracic	Premotor	eGFP	LG	-166.845	-243.084	72.5806
170125n3	thoracic	Premotor	eGFP	LG	45.1444	-44.8438	205.645
170125n3	thoracic	Premotor	eGFP	LG	15.4589	-55.9621	737.903
170125n3	thoracic	Premotor	eGFP	LG	263.86	119.832	1713.71
170125n3	thoracic	Premotor	eGFP	LG	-196.907	-102.204	2778.23
170508n7	thoracic	Premotor	eGFP	LG	283.412	-63.4804	-2500
170508n7	thoracic	Premotor	eGFP	LG	-96.0836	16.5414	-2467.46
170508n7	thoracic	Premotor	eGFP	LG	-144.125	-125.263	-2467.46
170508n7	thoracic	Premotor	eGFP	LG	314	-102.398	-2434.91
170508n7	thoracic	Premotor	eGFP	LG	217	-21.8225	-2434.91
170508n7	thoracic	Premotor	eGFP	LG	13	56.9298	-2434.91
170508n7	thoracic	Premotor	eGFP	LG	-134.015	33.7308	-2434.91
170508n7	thoracic	Premotor	eGFP	LG	301.867	-150.377	-2402.37
170508n7	thoracic	Premotor	eGFP	LG	-79.798	-97.3829	-2402.37
170508n7	thoracic	Premotor	eGFP	LG	342.119	-139.646	-2337.28
170508n7	thoracic	Premotor	eGFP	LG	290.704	-115.815	-2304.73
170508n7	thoracic	Premotor	eGFP	LG	-118.447	-122.949	-2272.19
170508n7	thoracic	Premotor	eGFP	LG	-175.728	-52.0513	-2272.19
170508n7	thoracic	Premotor	eGFP	LG	-195.146	-97.8205	-2272.19
170508n7	thoracic	Premotor	eGFP	LG	338.381	-164.912	-2239.64
170508n7	thoracic	Premotor	eGFP	LG	293.617	146.034	-2207.1
170508n7	thoracic	Premotor	eGFP	LG	246.809	174.483	-2207.1
170508n7	thoracic	Premotor	eGFP	LG	333.696	140.901	-2174.56
170508n7	thoracic	Premotor	eGFP	LG	329.805	199.02	-2142.01
170508n7	thoracic	Premotor	eGFP	LG	300.836	58.8235	-2142.01
170508n7	thoracic	Premotor	eGFP	LG	340.541	105.694	-2109.47
170508n7	thoracic	Premotor	eGFP	LG	168.649	-250.651	-2109.47
170508n7	thoracic	Premotor	eGFP	LG	-151.111	-56.3003	-2076.92
170508n7	thoracic	Premotor	eGFP	LG	343.455	-57.6167	-1979.29
170508n7	thoracic	Premotor	eGFP	LG	103.627	-227.847	-1914.2
170508n7	thoracic	Premotor	eGFP	LG	-141.667	-48.3073	-1914.2
170508n7	thoracic	Premotor	eGFP	LG	-173.958	-167.708	-1914.2
170508n7	thoracic	Premotor	eGFP	LG	318.717	132	-1881.66
170508n7	thoracic	Premotor	eGFP	LG	310.16	67	-1881.66
170508n7	thoracic	Premotor	eGFP	LG	182.888	-1.74564	-1881.66
170508n7	thoracic	Premotor	eGFP	LG	307.246	159.317	-1784.02
170508n7	thoracic	Premotor	eGFP	LG	-190.13	-97.526	-1784.02
170508n7	thoracic	Premotor	eGFP	LG	-252.468	-74.7396	-1784.02
170508n7	thoracic	Premotor	eGFP	LG	259.944	40.9256	-1718.93
170508n7	thoracic	Premotor	eGFP	LG	-116.711	-103.865	-1686.39
170508n7	thoracic	Premotor	eGFP	LG	215.385	121.387	-1653.85
170508n7	thoracic	Premotor	eGFP	LG	12.7536	-46.5517	-1523.67
170508n7	thoracic	Premotor	eGFP	LG	-52.3077	-60.992	-1523.67
170508n7	thoracic	Premotor	eGFP	LG	126.857	-21.9321	-1491.12
170508n7	thoracic	Premotor	eGFP	LG	-201.635	-143.473	-1458.58
170508n7	thoracic	Premotor	eGFP	LG	265.537	-27.1318	-1426.04
170508n7	thoracic	Premotor	eGFP	LG	6.77966	173.684	-1426.04
170508n7	thoracic	Premotor	eGFP	LG	-282	-163.973	-1360.95
170508n7	thoracic	Premotor	eGFP	LG	261.714	182.657	-1230.77
170508n7	thoracic	Premotor	eGFP	LG	-241.595	-211.173	-1100.59
170508n7	thoracic	Premotor	eGFP	LG	-163.128	-141.276	-937.87
170508n7	thoracic	Premotor	eGFP	LG	-124.862	-71.1382	-872.781
170508n7	thoracic	Premotor	eGFP	LG	-103.467	-202.202	-840.237
170508n7	thoracic	Premotor	eGFP	LG	122.449	129.038	-807.692
170508n7	thoracic	Premotor	eGFP	LG	296.296	-81.0734	-775.148
170508n7	thoracic	Premotor	eGFP	LG	-120	-123.861	-742.604
170508n7	thoracic	Premotor	eGFP	LG	-135.135	-289.008	-742.604
170508n7	thoracic	Premotor	eGFP	LG	19.0476	52.8431	-644.97
170508n7	thoracic	Premotor	eGFP	LG	87.2093	202.467	-612.426
170508n7	thoracic	Premotor	eGFP	LG	282.899	45.1336	-579.882
170508n7	thoracic	Premotor	eGFP	LG	301.95	-64.4476	-514.793
170508n7	thoracic	Premotor	eGFP	LG	213.031	98.6137	-449.704
170508n7	thoracic	Premotor	eGFP	LG	285.057	176.454	-417.16
170508n7	thoracic	Premotor	eGFP	LG	-169.821	-92.5926	-352.071
170508n7	thoracic	Premotor	eGFP	LG	-184.143	-106.481	-352.071
170508n7	thoracic	Premotor	eGFP	LG	306.087	205.972	-156.805
170508n7	thoracic	Premotor	eGFP	LG	-118.67	-31.4714	-124.26
170508n7	thoracic	Premotor	eGFP	LG	345.455	200.498	71.0059
170508n7	thoracic	Premotor	eGFP	LG	364.543	179.787	266.272
170508n7	thoracic	Premotor	eGFP	LG	220.528	4.22265	461.538
170508n7	thoracic	Premotor	eGFP	LG	265.922	106.158	591.716
170508n7	thoracic	Premotor	eGFP	LG	242.458	215.485	624.26
170508n7	thoracic	Premotor	eGFP	LG	137.43	-1.75	624.26
170508n7	thoracic	Premotor	eGFP	LG	292.683	170.053	786.982
170508n7	thoracic	Premotor	eGFP	LG	-125.942	-306.897	852.071
170508n7	thoracic	Premotor	eGFP	LG	117.978	210.236	1079.88
170508n7	thoracic	Premotor	eGFP	LG	329.412	-60	1177.51
170508n7	thoracic	Premotor	eGFP	LG	-204.878	-236.512	1535.5
170508n7	thoracic	Premotor	eGFP	LG	319.792	171.758	1633.14
170508n7	thoracic	Premotor	eGFP	LG	-140.723	-68.1948	1860.95
170508n7	thoracic	Premotor	eGFP	LG	266.353	75.7603	2153.85
170508n7	thoracic	Premotor	eGFP	LG	267.22	200.095	2609.47
170125n3	thoracic	Premotor	divergent	LGMG	292.269	149.445	-1524.19
170125n3	thoracic	Premotor	divergent	LGMG	233.18	178.2	-1479.84
170125n3	thoracic	Premotor	divergent	LGMG	-61.3811	-161.615	-1435.48
170125n3	thoracic	Premotor	divergent	LGMG	-80.8399	-136.364	-1080.65
170125n3	thoracic	Premotor	divergent	LGMG	45.7711	10.2062	-814.516
170125n3	thoracic	Premotor	divergent	LGMG	-252.582	-124.744	-592.742
170125n3	thoracic	Premotor	divergent	LGMG	411.043	205.762	-504.032
170125n3	thoracic	Premotor	divergent	LGMG	264.531	138.031	-326.613
170125n3	thoracic	Premotor	divergent	LGMG	40.7407	-23.9474	-282.258
170125n3	thoracic	Premotor	divergent	LGMG	61.1111	-31.3158	-282.258
170125n3	thoracic	Premotor	divergent	LGMG	292.774	216.318	471.774
170125n3	thoracic	Premotor	divergent	LGMG	320.403	176.476	560.484
170125n3	thoracic	Premotor	divergent	LGMG	336.735	-108.866	1048.39
170125n3	thoracic	Premotor	divergent	LGMG	-107.143	-160.448	1137.1
170508n7	thoracic	Premotor	divergent	LGMG	356.056	136.292	-2304.73
170508n7	thoracic	Premotor	divergent	LGMG	270.423	-20.438	-2304.73
170508n7	thoracic	Premotor	divergent	LGMG	287.206	171.048	-2239.64
170508n7	thoracic	Premotor	divergent	LGMG	268.12	-161.275	-2044.38
170508n7	thoracic	Premotor	divergent	LGMG	-146.77	-160.154	-1979.29
170508n7	thoracic	Premotor	divergent	LGMG	-196.419	-121.154	-1946.75
170508n7	thoracic	Premotor	divergent	LGMG	-76.2836	-119.643	-1816.57
170508n7	thoracic	Premotor	divergent	LGMG	263.305	114.791	-1718.93
170508n7	thoracic	Premotor	divergent	LGMG	-114.441	-213.838	-1458.58
170508n7	thoracic	Premotor	divergent	LGMG	277.987	144.843	-1328.4
170508n7	thoracic	Premotor	divergent	LGMG	67.2365	0	-1263.31
170508n7	thoracic	Premotor	divergent	LGMG	325.714	178.598	-1230.77
170508n7	thoracic	Premotor	divergent	LGMG	120.455	-121.26	-1165.68
170503n6	thoracic	Premotor	mCherry	TA	169.267	121.695	-2239.64
170503n6	thoracic	Premotor	mCherry	TA	306.383	131.178	-2239.64
170503n6	thoracic	Premotor	mCherry	TA	235.461	192.816	-2239.64
170503n6	thoracic	Premotor	mCherry	TA	253.428	198.348	-2239.64
170503n6	thoracic	Premotor	mCherry	TA	243.972	276.58	-2239.64
170503n6	thoracic	Premotor	mCherry	TA	-158.809	-112.247	-2174.56
170503n6	thoracic	Premotor	mCherry	TA	384.925	188.692	-2174.56
170503n6	thoracic	Premotor	mCherry	TA	250.251	192.077	-2174.56
170503n6	thoracic	Premotor	mCherry	TA	-271.96	224.575	-2174.56
170503n6	thoracic	Premotor	mCherry	TA	375.532	-23.842	-2142.01
170503n6	thoracic	Premotor	mCherry	TA	235.106	56.3492	-2142.01
170503n6	thoracic	Premotor	mCherry	TA	294.681	118.254	-2142.01
170503n6	thoracic	Premotor	mCherry	TA	284.694	296.22	-2076.92
170503n6	thoracic	Premotor	mCherry	TA	347.959	144.643	-2044.38
170503n6	thoracic	Premotor	mCherry	TA	220.408	157.143	-2044.38
170503n6	thoracic	Premotor	mCherry	TA	248.433	-132.153	-2011.83
170503n6	thoracic	Premotor	mCherry	TA	286.04	11.1544	-2011.83
170503n6	thoracic	Premotor	mCherry	TA	322.507	134.711	-2011.83
170503n6	thoracic	Premotor	mCherry	TA	267.677	162.727	-1979.29
170503n6	thoracic	Premotor	mCherry	TA	366.404	-34.4101	-1946.75
170503n6	thoracic	Premotor	mCherry	TA	365.354	209.524	-1946.75
170503n6	thoracic	Premotor	mCherry	TA	-152.185	-102.083	-1881.66
170503n6	thoracic	Premotor	mCherry	TA	282.105	7.9582	-1881.66
170503n6	thoracic	Premotor	mCherry	TA	366.753	26.2308	-1849.11
170503n6	thoracic	Premotor	mCherry	TA	340.157	-53.6932	-1816.57
170503n6	thoracic	Premotor	mCherry	TA	359.055	177.479	-1816.57
170503n6	thoracic	Premotor	mCherry	TA	253.409	252.2	-1784.02
170503n6	thoracic	Premotor	mCherry	TA	173.434	-146.012	-1718.93
170503n6	thoracic	Premotor	mCherry	TA	372.671	-11.0315	-1621.3
170503n6	thoracic	Premotor	mCherry	TA	265.839	212.439	-1621.3
170503n6	thoracic	Premotor	mCherry	TA	225.287	-35.2941	-1556.21
170503n6	thoracic	Premotor	mCherry	TA	298.851	152.568	-1556.21
170503n6	thoracic	Premotor	mCherry	TA	-117.718	108.733	-1523.67
170503n6	thoracic	Premotor	mCherry	TA	261.862	109.076	-1491.12
170503n6	thoracic	Premotor	mCherry	TA	302.273	164.716	-1458.58
170503n6	thoracic	Premotor	mCherry	TA	220.772	-3.85675	-1426.04
170503n6	thoracic	Premotor	mCherry	TA	137.536	-72.792	-1360.95
170503n6	thoracic	Premotor	mCherry	TA	-93.9759	-22.9058	-1360.95
170503n6	thoracic	Premotor	mCherry	TA	339.21	102.878	-1328.4
170503n6	thoracic	Premotor	mCherry	TA	171.594	156.44	-1295.86
170503n6	thoracic	Premotor	mCherry	TA	-201.183	-132.143	-1263.31
170503n6	thoracic	Premotor	mCherry	TA	-134.194	-124.25	-1198.22
170503n6	thoracic	Premotor	mCherry	TA	300.324	173.204	-1198.22
170503n6	thoracic	Premotor	mCherry	TA	-204.651	-89.6985	-1165.68
170503n6	thoracic	Premotor	mCherry	TA	-29.2359	-15.8291	-1165.68
170503n6	thoracic	Premotor	mCherry	TA	263.953	166.075	-1133.14
170503n6	thoracic	Premotor	mCherry	TA	228.916	45.098	-970.414
170503n6	thoracic	Premotor	mCherry	TA	328.916	157.843	-970.414
170503n6	thoracic	Premotor	mCherry	TA	260.661	202	-840.237
170503n6	thoracic	Premotor	mCherry	TA	-173.913	-67.6845	-710.059
170503n6	thoracic	Premotor	mCherry	TA	304.658	154.233	-612.426
170503n6	thoracic	Premotor	mCherry	TA	272.877	169.753	-612.426
170503n6	thoracic	Premotor	mCherry	TA	-41.791	-179.572	-579.882
170503n6	thoracic	Premotor	mCherry	TA	-168.997	-102.542	-547.337
170503n6	thoracic	Premotor	mCherry	TA	315.077	13.7011	-514.793
170503n6	thoracic	Premotor	mCherry	TA	197.802	37.6977	-384.615
170503n6	thoracic	Premotor	mCherry	TA	-271.856	-173.232	-352.071
170503n6	thoracic	Premotor	mCherry	TA	-294.857	-51.6839	494.083
170503n6	thoracic	Premotor	mCherry	TA	282.353	-4.16667	624.26
170503n6	thoracic	Premotor	mCherry	TA	252.459	-57.2275	656.805
170503n6	thoracic	Premotor	mCherry	TA	248.533	154.688	1014.79
170503n6	thoracic	Premotor	mCherry	TA	323.81	-90.099	1047.34
170503n6	thoracic	Premotor	mCherry	TA	304.255	196.216	1079.88
170503n6	thoracic	Premotor	mCherry	TA	91.4894	244.775	1079.88
170503n6	thoracic	Premotor	mCherry	TA	321.505	-65.7895	1112.43
170503n6	thoracic	Premotor	mCherry	TA	-289.247	-80.9045	1470.41
170503n6	thoracic	Premotor	mCherry	TA	291.457	151.449	1568.05
170503n6	thoracic	Premotor	mCherry	TA	109.763	251.349	1698.22
170503n6	thoracic	Premotor	mCherry	TA	263.59	112.245	1730.77
170503n6	thoracic	Premotor	mCherry	TA	281.297	79.9308	1958.58
170503n6	thoracic	Premotor	mCherry	TA	-141.117	-177.04	2316.57
170503n6	thoracic	Premotor	mCherry	TA	157.437	-143.765	2316.57
170503n6	thoracic	Premotor	mCherry	TA	-145.178	-133.8	2316.57
170503n6	thoracic	Premotor	mCherry	TA	208.411	167.925	2642.01
170503n6	thoracic	Premotor	mCherry	TA	-154.93	-140.162	2739.64
170503n6	thoracic	Premotor	mCherry	TA	310.247	138.696	non available
170503n6	thoracic	Premotor	mCherry	TA	232.044	68.8766	non available
170503n6	thoracic	Premotor	mCherry	TA	233.389	230.214	non available
170427n2	thoracic	Premotor	mCherry	TA	352.511	93.9698	-2500
170427n2	thoracic	Premotor	mCherry	TA	200	-8.37766	-2500
170427n2	thoracic	Premotor	mCherry	TA	287.221	222.266	-2476.5
170427n2	thoracic	Premotor	mCherry	TA	79.5132	91.5214	-2476.5
170427n2	thoracic	Premotor	mCherry	TA	294.523	-101.801	-2476.5
170427n2	thoracic	Premotor	mCherry	TA	-226.281	-99.5935	-2476.5
170427n2	thoracic	Premotor	mCherry	TA	282.353	-102.77	-2476.5
170427n2	thoracic	Premotor	mCherry	TA	263.866	14.4737	-2452.99
170427n2	thoracic	Premotor	mCherry	TA	289.916	-50.3659	-2452.99
170427n2	thoracic	Premotor	mCherry	TA	237.524	184.528	-2405.98
170427n2	thoracic	Premotor	mCherry	TA	-130.871	-170.408	-2358.97
170427n2	thoracic	Premotor	mCherry	TA	128.416	86.4957	-2335.47
170427n2	thoracic	Premotor	mCherry	TA	261.345	184.686	-2264.96
170427n2	thoracic	Premotor	mCherry	TA	261.345	-123.861	-2264.96
170427n2	thoracic	Premotor	mCherry	TA	220.128	68.9863	-2241.45
170427n2	thoracic	Premotor	mCherry	TA	-214.684	-108.247	-2241.45
170427n2	thoracic	Premotor	mCherry	TA	322.056	130.314	-2217.95
170427n2	thoracic	Premotor	mCherry	TA	293.878	97.9201	-2194.44
170427n2	thoracic	Premotor	mCherry	TA	-166.839	-111.885	-2170.94
170427n2	thoracic	Premotor	mCherry	TA	145.376	93.5185	-2147.44
170427n2	thoracic	Premotor	mCherry	TA	275.829	103.356	-2123.93
170427n2	thoracic	Premotor	mCherry	TA	244.55	19.3792	-2123.93
170427n2	thoracic	Premotor	mCherry	TA	274.112	213.592	-2100.43
170427n2	thoracic	Premotor	mCherry	TA	127.919	44.4984	-2100.43
170427n2	thoracic	Premotor	mCherry	TA	273.381	178.656	-2076.92
170427n2	thoracic	Premotor	mCherry	TA	350.12	3.7415	-2076.92
170427n2	thoracic	Premotor	mCherry	TA	-226.273	-88.9037	-2076.92
170427n2	thoracic	Premotor	mCherry	TA	-135.244	-132.432	-2053.42
170427n2	thoracic	Premotor	mCherry	TA	185.203	-72.8669	-2029.91
170427n2	thoracic	Premotor	mCherry	TA	223.529	110.924	-2006.41
170427n2	thoracic	Premotor	mCherry	TA	-205.248	-104.37	-1982.91
170427n2	thoracic	Premotor	mCherry	TA	287.562	103.068	-1959.4
170427n2	thoracic	Premotor	mCherry	TA	222.34	158.524	-1935.9
170427n2	thoracic	Premotor	mCherry	TA	194.373	152.249	-1912.39
170427n2	thoracic	Premotor	mCherry	TA	273.247	172.83	-1865.38
170427n2	thoracic	Premotor	mCherry	TA	308.571	79.2535	-1865.38
170427n2	thoracic	Premotor	mCherry	TA	-151.807	-194.855	-1865.38
170427n2	thoracic	Premotor	mCherry	TA	305.943	88.8605	-1841.88
170427n2	thoracic	Premotor	mCherry	TA	345.856	59.8639	-1818.38
170427n2	thoracic	Premotor	mCherry	TA	-219.808	-117.608	-1583.33
170427n2	thoracic	Premotor	mCherry	TA	325.14	230.763	-1520.66
170427n2	thoracic	Premotor	mCherry	TA	138.547	24.6269	-1520.66
170427n2	thoracic	Premotor	mCherry	TA	363.128	-8.47751	-1520.66
170427n2	thoracic	Premotor	mCherry	TA	333.934	239.255	-1497.15
170427n2	thoracic	Premotor	mCherry	TA	296.697	199.22	-1497.15
170427n2	thoracic	Premotor	mCherry	TA	283.761	77.3132	-1379.63
170427n2	thoracic	Premotor	mCherry	TA	324.786	52.847	-1379.63
170427n2	thoracic	Premotor	mCherry	TA	-93.6937	-86.1675	-1379.63
170427n2	thoracic	Premotor	mCherry	TA	343.353	26.9022	-1348.29
170427n2	thoracic	Premotor	mCherry	TA	298.413	175.96	-1301.28
170427n2	thoracic	Premotor	mCherry	TA	264.55	159.872	-1301.28
170427n2	thoracic	Premotor	mCherry	TA	277.528	128.069	-1136.75
170427n2	thoracic	Premotor	mCherry	TA	314.921	150.806	-878.205
170427n2	thoracic	Premotor	mCherry	TA	357.827	174.778	-784.188
170427n2	thoracic	Premotor	mCherry	TA	295.208	6.11111	-784.188
170427n2	thoracic	Premotor	mCherry	TA	316.19	-55.7627	-384.615
170427n2	thoracic	Premotor	mCherry	TA	321.978	158.537	-32.0513
170427n2	thoracic	Premotor	mCherry	TA	285.873	-11.1821	14.9573
170427n2	thoracic	Premotor	mCherry	TA	292.521	-29.0735	14.9573
170427n2	thoracic	Premotor	mCherry	TA	131.818	198.73	38.4615
170427n2	thoracic	Premotor	mCherry	TA	317.867	142.843	226.496
170427n2	thoracic	Premotor	mCherry	TA	-277.015	-154.902	438.034
170427n2	thoracic	Premotor	mCherry	TA	-293.731	-155.882	438.034
170427n2	thoracic	Premotor	mCherry	TA	389.969	125.775	931.624
170427n2	thoracic	Premotor	mCherry	TA	-271.01	-160.458	1072.65
170427n2	thoracic	Premotor	mCherry	TA	-175.723	-204.947	-1042.74
170427n2	thoracic	Premotor	mCherry	TA	262.275	113.264	-995.726
170427n2	thoracic	Premotor	mCherry	TA	326.946	-9.21053	-995.726
170427n2	thoracic	Premotor	mCherry	TA	275.988	128.702	-948.718
170427n3	thoracic	Premotor	mCherry	TA	380.723	-26.4706	-2315.9
170427n3	thoracic	Premotor	mCherry	TA	-221.891	-114.495	-2200.84
170427n3	thoracic	Premotor	mCherry	TA	245.596	29.0429	-1970.71
170427n3	thoracic	Premotor	mCherry	TA	179.412	46.9283	-1947.7
170427n3	thoracic	Premotor	mCherry	TA	-137.363	12.6437	-1901.67
170427n3	thoracic	Premotor	mCherry	TA	213.123	130.637	-1878.66
170427n3	thoracic	Premotor	mCherry	TA	234.903	139.101	-1740.59
170427n3	thoracic	Premotor	mCherry	TA	234.884	68.9769	-1579.5
170427n3	thoracic	Premotor	mCherry	TA	219.661	14.8148	-1487.45
170427n3	thoracic	Premotor	mCherry	TA	127.381	11.1486	-1418.41
170427n3	thoracic	Premotor	mCherry	TA	254.762	0	-1418.41
170427n3	thoracic	Premotor	mCherry	TA	364.331	-30.6647	-1165.27
170427n3	thoracic	Premotor	mCherry	TA	-186.466	-120.556	-797.071
170427n3	thoracic	Premotor	mCherry	TA	314.983	182.904	146.444
170427n3	thoracic	Premotor	mCherry	TA	288.968	-52.6012	330.544
170508n7	thoracic	Premotor	divergent	LGMG	291.014	128.026	-1133.14
170508n7	thoracic	Premotor	divergent	LGMG	-132.632	-108.06	-1133.14
170508n7	thoracic	Premotor	divergent	LGMG	221.176	-197.745	-1002.96
170508n7	thoracic	Premotor	divergent	LGMG	-229.333	-108.808	-840.237
170508n7	thoracic	Premotor	divergent	LGMG	318.75	163.233	-547.337
170508n7	thoracic	Premotor	divergent	LGMG	323.209	189.92	-286.982
170508n7	thoracic	Premotor	divergent	LGMG	284.337	77.5934	-124.26
170508n7	thoracic	Premotor	divergent	LGMG	258.065	188.964	461.538
170508n7	thoracic	Premotor	divergent	LGMG	296.216	176.965	656.805
170508n7	thoracic	Premotor	divergent	LGMG	-177.099	-83.8272	656.805
170508n7	thoracic	Premotor	divergent	LGMG	257.955	170.261	1047.34
170508n7	thoracic	Premotor	divergent	LGMG	-162.963	-309.791	3000
170125n3	thoracic	Premotor	mCherry	MG	33.1551	-24.2308	-1834.68
170125n3	thoracic	Premotor	mCherry	MG	298.396	-228.846	-1834.68
170125n3	thoracic	Premotor	mCherry	MG	317.703	112.797	-1790.32
170125n3	thoracic	Premotor	mCherry	MG	45.933	-97.8814	-1790.32
170125n3	thoracic	Premotor	mCherry	MG	-69.8565	-118.269	-1790.32
170125n3	thoracic	Premotor	mCherry	MG	261.818	193.107	-1745.97
170125n3	thoracic	Premotor	mCherry	MG	66.3636	14.1544	-1745.97
170125n3	thoracic	Premotor	mCherry	MG	44.5455	-29.4038	-1745.97
170125n3	thoracic	Premotor	mCherry	MG	-55.4371	-85.4412	-1745.97
170125n3	thoracic	Premotor	mCherry	MG	318.182	-106.233	-1745.97
170125n3	thoracic	Premotor	mCherry	MG	264.545	-109.079	-1745.97
170125n3	thoracic	Premotor	mCherry	MG	-78.4648	-118.382	-1745.97
170125n3	thoracic	Premotor	mCherry	MG	191.898	187.691	-1701.61
170125n3	thoracic	Premotor	mCherry	MG	-79.2453	49.1228	-1701.61
170125n3	thoracic	Premotor	mCherry	MG	-279.245	-59.7796	-1701.61
170125n3	thoracic	Premotor	mCherry	MG	287.764	102.25	-1657.26
170125n3	thoracic	Premotor	mCherry	MG	-81.106	42.798	-1657.26
170125n3	thoracic	Premotor	mCherry	MG	183.122	19.3738	-1657.26
170125n3	thoracic	Premotor	mCherry	MG	-282.949	-71.6138	-1657.26
170125n3	thoracic	Premotor	mCherry	MG	339.241	-99.7455	-1657.26
170125n3	thoracic	Premotor	mCherry	MG	261.818	-16.1685	-1612.9
170125n3	thoracic	Premotor	mCherry	MG	90.3896	-37.0924	-1612.9
170125n3	thoracic	Premotor	mCherry	MG	-98.6425	-142.932	-1612.9
170125n3	thoracic	Premotor	mCherry	MG	-90.4977	-144.764	-1612.9
170125n3	thoracic	Premotor	mCherry	MG	-16	72.1761	-1568.55
170125n3	thoracic	Premotor	mCherry	MG	46.5116	45.8333	-1568.55
170125n3	thoracic	Premotor	mCherry	MG	-111.111	-147.316	-1568.55
170125n3	thoracic	Premotor	mCherry	MG	273.488	-167.257	-1568.55
170125n3	thoracic	Premotor	mCherry	MG	26.9327	-57.6659	-1524.19
170125n3	thoracic	Premotor	mCherry	MG	-283.041	-148.861	-1524.19
170125n3	thoracic	Premotor	mCherry	MG	280.084	-177.431	-1524.19
170125n3	thoracic	Premotor	mCherry	MG	48.8479	14.3	-1479.84
170125n3	thoracic	Premotor	mCherry	MG	-61.3811	-26.7705	-1435.48
170125n3	thoracic	Premotor	mCherry	MG	39.6783	-25.6098	-1435.48
170125n3	thoracic	Premotor	mCherry	MG	-324.891	-13.3588	-1391.13
170125n3	thoracic	Premotor	mCherry	MG	-216.594	-130.025	-1391.13
170125n3	thoracic	Premotor	mCherry	MG	380.6	125.213	-1258.06
170125n3	thoracic	Premotor	mCherry	MG	-259.366	-85.5164	-1258.06
170125n3	thoracic	Premotor	mCherry	MG	272.517	-118.114	-1258.06
170125n3	thoracic	Premotor	mCherry	MG	223.557	-303.102	-1258.06
170125n3	thoracic	Premotor	mCherry	MG	301.357	190.385	-1125
170125n3	thoracic	Premotor	mCherry	MG	254.299	-163.164	-1125
170125n3	thoracic	Premotor	mCherry	MG	-112	-258.293	-1125
170125n3	thoracic	Premotor	mCherry	MG	-98.0392	141.773	-947.581
170125n3	thoracic	Premotor	mCherry	MG	270.3	24.4444	-947.581
170125n3	thoracic	Premotor	mCherry	MG	-156.265	-310.714	-903.226
170125n3	thoracic	Premotor	mCherry	MG	275.578	229.787	-858.871
170125n3	thoracic	Premotor	mCherry	MG	-88.7781	-65.8416	-770.161
170125n3	thoracic	Premotor	mCherry	MG	278.539	-39.9272	-725.806
170125n3	thoracic	Premotor	mCherry	MG	-201.087	156.052	-637.097
170125n3	thoracic	Premotor	mCherry	MG	-65.7277	-100.513	-592.742
170125n3	thoracic	Premotor	mCherry	MG	280.335	-146.597	-592.742
170125n3	thoracic	Premotor	mCherry	MG	-170.127	-38.7838	-504.032
170125n3	thoracic	Premotor	mCherry	MG	-97.2152	-187.297	-504.032
170125n3	thoracic	Premotor	mCherry	MG	-125.57	-193.919	-504.032
170125n3	thoracic	Premotor	mCherry	MG	-200	-184.953	-459.677
170125n3	thoracic	Premotor	mCherry	MG	-48.5549	-43.3486	-415.323
170125n3	thoracic	Premotor	mCherry	MG	-255.491	-107.569	-415.323
170125n3	thoracic	Premotor	mCherry	MG	-116.788	-26.3158	-282.258
170125n3	thoracic	Premotor	mCherry	MG	-93.4307	-120.175	-282.258
170125n3	thoracic	Premotor	mCherry	MG	-73.9659	-137.719	-282.258
170125n3	thoracic	Premotor	mCherry	MG	-127.273	-38.7972	-193.548
170125n3	thoracic	Premotor	mCherry	MG	-221.13	-99.75	-149.194
170125n3	thoracic	Premotor	mCherry	MG	-66.1417	-110.437	-104.839
170125n3	thoracic	Premotor	mCherry	MG	30.0518	8.42912	-60.4839
170125n3	thoracic	Premotor	mCherry	MG	-93.3002	-154.177	-16.129
170125n3	thoracic	Premotor	mCherry	MG	355.556	-252.078	-16.129
170125n3	thoracic	Premotor	mCherry	MG	276.364	-40.1146	28.2258
170125n3	thoracic	Premotor	mCherry	MG	52.7273	-99.2837	28.2258
170125n3	thoracic	Premotor	mCherry	MG	-66.8281	-130.57	161.29
170125n3	thoracic	Premotor	mCherry	MG	226.772	-132.344	205.645
170125n3	thoracic	Premotor	mCherry	MG	-60.7595	-130.233	205.645
170125n3	thoracic	Premotor	mCherry	MG	50.3497	21.2316	250
170125n3	thoracic	Premotor	mCherry	MG	114.409	-25.6545	383.065
170125n3	thoracic	Premotor	mCherry	MG	254.214	-161.607	427.419
170125n3	thoracic	Premotor	mCherry	MG	125.945	-335.731	560.484
170125n3	thoracic	Premotor	mCherry	MG	107.449	37.6258	693.548
170125n3	thoracic	Premotor	mCherry	MG	205.869	-244.652	693.548
170125n3	thoracic	Premotor	mCherry	MG	188.713	-249.876	693.548
170125n3	thoracic	Premotor	mCherry	MG	-196.02	68.6239	870.968
170125n3	thoracic	Premotor	mCherry	MG	-153.234	42.3853	870.968
170125n3	thoracic	Premotor	mCherry	MG	-238.695	-156.46	1092.74
170125n3	thoracic	Premotor	mCherry	MG	-137.995	-212.532	1092.74
170125n3	thoracic	Premotor	mCherry	MG	-139.348	-93.75	1314.52
170125n3	thoracic	Premotor	mCherry	MG	-232.763	-88.8601	1403.23
170125n3	thoracic	Premotor	mCherry	MG	-242.08	-80.2667	1447.58
170125n3	thoracic	Premotor	mCherry	MG	353.465	-108.971	1491.94
170125n3	thoracic	Premotor	mCherry	MG	-249.802	-124.806	1758.06
170125n3	thoracic	Premotor	mCherry	MG	-266.187	-125.781	1802.42
170125n3	thoracic	Premotor	mCherry	MG	-214.706	210.547	3000
170508n7	thoracic	Premotor	mCherry	MG	293.333	107.46	-2402.37
170508n7	thoracic	Premotor	mCherry	MG	185.013	160.769	-2337.28
170508n7	thoracic	Premotor	mCherry	MG	360.563	-64.7202	-2304.73
170508n7	thoracic	Premotor	mCherry	MG	342.408	-29.4554	-2272.19
170508n7	thoracic	Premotor	mCherry	MG	-277.807	-147.462	-2239.64
170508n7	thoracic	Premotor	mCherry	MG	305.319	-157.18	-2207.1
170508n7	thoracic	Premotor	mCherry	MG	232.869	84.3137	-2142.01
170508n7	thoracic	Premotor	mCherry	MG	331.892	-177.734	-2109.47
170508n7	thoracic	Premotor	mCherry	MG	-164.524	-31.4815	-2109.47
170508n7	thoracic	Premotor	mCherry	MG	-158.794	-81.7585	-2044.38
170508n7	thoracic	Premotor	mCherry	MG	-131.969	-210.897	-1946.75
170508n7	thoracic	Premotor	mCherry	MG	-188.235	-26.9231	-1946.75
170508n7	thoracic	Premotor	mCherry	MG	244.56	-35.5198	-1914.2
170508n7	thoracic	Premotor	mCherry	MG	359.783	-49	-1849.11
170508n7	thoracic	Premotor	mCherry	MG	-192	-145.558	-2044.38
170508n7	thoracic	Premotor	mCherry	MG	286.162	-129.257	-1816.57
170508n7	thoracic	Premotor	mCherry	MG	223.913	172.253	-1751.48
170508n7	thoracic	Premotor	mCherry	MG	-174.444	-134.543	-1556.21
170508n7	thoracic	Premotor	mCherry	MG	-216.043	-98.7903	-1491.12
170508n7	thoracic	Premotor	mCherry	MG	-162.398	-150.783	-1458.58
170508n7	thoracic	Premotor	mCherry	MG	313.295	-97.5871	-1393.49
170508n7	thoracic	Premotor	mCherry	MG	249.143	-29.2453	-1230.77
170508n7	thoracic	Premotor	mCherry	MG	-224.211	-15.3005	-1133.14
170508n7	thoracic	Premotor	mCherry	MG	108.262	-4.4757	-1100.59
170508n7	thoracic	Premotor	mCherry	MG	-183.476	-175.978	-1100.59
170508n7	thoracic	Premotor	mCherry	MG	312.849	-50.271	-1035.5
170508n7	thoracic	Premotor	mCherry	MG	-104.918	-198.214	-1002.96
170508n7	thoracic	Premotor	mCherry	MG	293.878	137.5	-807.692
170508n7	thoracic	Premotor	mCherry	MG	275.132	127.583	-775.148
170508n7	thoracic	Premotor	mCherry	MG	-152.909	-230.89	-677.515
170508n7	thoracic	Premotor	mCherry	MG	36.25	-167.919	-547.337
170508n7	thoracic	Premotor	mCherry	MG	-181.921	-14.2132	-547.337
170508n7	thoracic	Premotor	mCherry	MG	-192.09	-29.3147	-547.337
170508n7	thoracic	Premotor	mCherry	MG	322.006	80.3605	-514.793
170508n7	thoracic	Premotor	mCherry	MG	14.7309	-95.2599	-449.704
170508n7	thoracic	Premotor	mCherry	MG	83.3803	-112.873	-352.071
170508n7	thoracic	Premotor	mCherry	MG	59.3023	-126.531	-254.438
170508n7	thoracic	Premotor	mCherry	MG	-175.758	-124.682	5.91716
170508n7	thoracic	Premotor	mCherry	MG	-106.667	-70.1799	201.183
170508n7	thoracic	Premotor	mCherry	MG	242.075	-262.017	363.905
170508n7	thoracic	Premotor	mCherry	MG	239.286	132.24	428.994
170508n7	thoracic	Premotor	mCherry	MG	-95.8678	-123.582	526.627
170508n7	thoracic	Premotor	mCherry	MG	304.607	171.025	786.982
170508n7	thoracic	Premotor	mCherry	MG	-108.808	-2.61845	819.527
170508n7	thoracic	Premotor	mCherry	MG	328.463	-27.6567	1405.33
170508n7	thoracic	Premotor	mCherry	MG	268.203	88	2284.02
170125n7	thoracic	Premotor	eGFP	PL	-15.5039	52.8431	-2500
170125n7	thoracic	Premotor	eGFP	PL	226.733	173.897	-2500
170125n7	thoracic	Premotor	eGFP	PL	266.337	14.1544	-2500
170125n7	thoracic	Premotor	eGFP	PL	108.642	-183.495	-2460.99
170125n7	thoracic	Premotor	eGFP	PL	246.091	57.4336	-2460.99
170125n7	thoracic	Premotor	eGFP	PL	251.852	41.8584	-2460.99
170125n7	thoracic	Premotor	eGFP	PL	169.33	-107.414	-2421.99
170125n7	thoracic	Premotor	eGFP	PL	305.607	144.792	-2382.98
170125n7	thoracic	Premotor	eGFP	PL	363.918	-19.112	-2343.97
170125n7	thoracic	Premotor	eGFP	PL	209.524	158.569	-2304.96
170125n7	thoracic	Premotor	eGFP	PL	280.272	197.379	-2304.96
170125n7	thoracic	Premotor	eGFP	PL	-67.8414	236.992	-2226.95
170125n7	thoracic	Premotor	eGFP	PL	271.392	149.065	-2187.94
170125n7	thoracic	Premotor	eGFP	PL	217.632	-68.7117	-2148.94
170125n7	thoracic	Premotor	eGFP	PL	267.003	148.649	-2148.94
170125n7	thoracic	Premotor	eGFP	PL	-280.597	-153.175	-2109.93
170125n7	thoracic	Premotor	eGFP	PL	43.6526	-74.5562	-2031.91
170125n7	thoracic	Premotor	eGFP	PL	334.967	-221.598	-2031.91
170125n7	thoracic	Premotor	eGFP	PL	280.519	-58.5075	-1953.9
170125n7	thoracic	Premotor	eGFP	PL	168.618	114.494	-1836.88
170125n7	thoracic	Premotor	eGFP	PL	332.88	-61.8902	-1797.87
170125n7	thoracic	Premotor	eGFP	PL	346.919	201.004	-1719.86
170125n7	thoracic	Premotor	eGFP	PL	-153.317	-89.3777	-1602.84
170125n7	thoracic	Premotor	eGFP	PL	-286.525	-112.472	-1563.83
170125n7	thoracic	Premotor	eGFP	PL	-142.787	-10.2477	-1524.82
170125n7	thoracic	Premotor	eGFP	PL	261.207	-118.942	-1524.82
170125n7	thoracic	Premotor	eGFP	PL	228.942	-116.667	-1485.82
170125n7	thoracic	Premotor	eGFP	PL	310.805	-56.0393	-1017.73
170125n7	thoracic	Premotor	eGFP	PL	312.644	-29.4944	-1017.73
170125n7	thoracic	Premotor	eGFP	PL	294.468	-25.5848	-978.723
170125n7	thoracic	Premotor	eGFP	PL	306.383	-54.2398	-978.723
170125n7	thoracic	Premotor	eGFP	PL	-296.833	180.417	-783.688
170125n7	thoracic	Premotor	eGFP	PL	388.913	203.981	-666.667
170125n7	thoracic	Premotor	eGFP	PL	221.258	144.207	-471.631
170125n7	thoracic	Premotor	eGFP	PL	-189.522	-131.37	-237.589
170125n7	thoracic	Premotor	eGFP	PL	289.72	184.444	-159.574
170125n7	thoracic	Premotor	eGFP	PL	-235.872	-89.5141	386.525
170125n7	thoracic	Premotor	eGFP	PL	-183.896	-78.3019	932.624
170125n7	thoracic	Premotor	eGFP	PL	-180.779	-217.925	971.631
170125n7	thoracic	Premotor	eGFP	PL	-140.566	-221.974	1049.65
170125n7	thoracic	Premotor	eGFP	PL	-112.621	-102.995	1400.71
170125n7	thoracic	Premotor	eGFP	PL	-228.571	-97.8261	1556.74
170125n7	thoracic	Premotor	eGFP	PL	310.359	230.405	1712.77
170125n7	thoracic	Premotor	eGFP	PL	349.776	212.205	1751.77
170125n7	thoracic	Premotor	eGFP	PL	332.939	-12.5691	1868.79
170214n8	thoracic	Premotor	eGFP	PL	40.6619	38	-2500
170214n8	thoracic	Premotor	eGFP	PL	56.8365	19.9597	-2436.78
170214n8	thoracic	Premotor	eGFP	PL	325.275	-138.158	-2405.17
170214n8	thoracic	Premotor	eGFP	PL	176.923	157.843	-2405.17
170214n8	thoracic	Premotor	eGFP	PL	147.804	-327.454	-2341.95
170214n8	thoracic	Premotor	eGFP	PL	283.204	312.974	-2341.95
170214n8	thoracic	Premotor	eGFP	PL	74.8268	16.1765	-2183.91
170214n8	thoracic	Premotor	eGFP	PL	323.711	229.519	-2057.47
170214n8	thoracic	Premotor	eGFP	PL	-21.5054	28.8427	-1867.82
170214n8	thoracic	Premotor	eGFP	PL	189.731	116.327	-1867.82
170214n8	thoracic	Premotor	eGFP	PL	267.971	83.8652	-1804.6
170214n8	thoracic	Premotor	eGFP	PL	146.313	276.087	-1709.77
170214n8	thoracic	Premotor	eGFP	PL	324.706	-49.7268	-1678.16
170214n8	thoracic	Premotor	eGFP	PL	263.501	156.591	-1583.33
170214n8	thoracic	Premotor	eGFP	PL	41.7582	-11.7571	-1551.72
170214n8	thoracic	Premotor	eGFP	PL	38.4342	15.0526	-1362.07
170214n8	thoracic	Premotor	eGFP	PL	326.28	205.799	-1235.63
170214n8	thoracic	Premotor	eGFP	PL	236.299	264.541	-1172.41
170214n8	thoracic	Premotor	eGFP	PL	28.7879	27.2043	-761.494
170214n8	thoracic	Premotor	eGFP	PL	-236.923	-99.2337	-729.885
170214n8	thoracic	Premotor	eGFP	PL	294.424	55	-698.276
170214n8	thoracic	Premotor	eGFP	PL	31.3167	-86.5979	-666.667
170214n8	thoracic	Premotor	eGFP	PL	315.328	147.821	-571.839
170214n8	thoracic	Premotor	eGFP	PL	293.902	156.562	-445.402
170214n8	thoracic	Premotor	eGFP	PL	323.881	207.588	-350.575
170214n8	thoracic	Premotor	eGFP	PL	397.306	192.551	250
170214n8	thoracic	Premotor	eGFP	PL	331.518	140.854	471.264
170214n8	thoracic	Premotor	eGFP	PL	306.977	172.409	977.011
170214n8	thoracic	Premotor	eGFP	PL	327.941	-35	1261.49
170214n8	thoracic	Premotor	eGFP	PL	162.857	-285.366	1356.32
170214n8	thoracic	Premotor	eGFP	PL	-369.048	260.526	1735.63
170214n8	thoracic	Premotor	eGFP	PL	220.183	-83.3333	1798.85
170214n8	thoracic	Premotor	eGFP	PL	13.7072	48.4581	2051.72
170214n8	thoracic	Premotor	eGFP	PL	240.741	-214.387	2399.43
170214n8	thoracic	Premotor	eGFP	PL	206.481	43.2712	2399.43
170214n8	thoracic	Premotor	eGFP	PL	332.152	225.347	2525.86
170214n8	thoracic	Premotor	eGFP	PL	-156.364	-173.323	2525.86
170125n7	thoracic	Premotor	mCherry	TA	158.025	-174.434	-2460.99
170125n7	thoracic	Premotor	mCherry	TA	342.268	208.108	-2343.97
170125n7	thoracic	Premotor	mCherry	TA	222.319	53.7594	-2109.93
170125n7	thoracic	Premotor	mCherry	TA	-231.034	-268.282	-2070.92
170125n7	thoracic	Premotor	mCherry	TA	300.465	194.299	-1992.91
170125n7	thoracic	Premotor	mCherry	TA	-191.537	-52.1111	-1953.9
170125n7	thoracic	Premotor	mCherry	TA	-196.098	-112.5	-1797.87
170125n7	thoracic	Premotor	mCherry	TA	-66.3551	-100	-1680.85
170125n7	thoracic	Premotor	mCherry	TA	323.276	-63.3705	-1524.82
170125n7	thoracic	Premotor	mCherry	TA	44.3497	-3.37621	-1446.81
170125n7	thoracic	Premotor	mCherry	TA	-172.973	-270.61	-1095.74
170125n7	thoracic	Premotor	mCherry	TA	-21.7984	-40	-900.709
170125n7	thoracic	Premotor	mCherry	TA	184.483	252.733	-315.603
170125n7	thoracic	Premotor	mCherry	TA	-155.869	-55.409	113.475
170125n7	thoracic	Premotor	mCherry	TA	333.8	-31.0284	113.475
170125n7	thoracic	Premotor	mCherry	TA	196.825	-35.8362	230.496
170125n7	thoracic	Premotor	mCherry	TA	300.223	104.762	347.518
170125n7	thoracic	Premotor	mCherry	TA	-194.595	-145.908	386.525
170125n7	thoracic	Premotor	mCherry	TA	-104.977	-250.651	1478.72
170214n8	thoracic	Premotor	mCherry	TA	-47.0588	-118.125	-2500
170214n8	thoracic	Premotor	mCherry	TA	341.371	-26.6404	-2500
170214n8	thoracic	Premotor	mCherry	TA	-155.882	89.2623	-2500
170214n8	thoracic	Premotor	mCherry	TA	199.464	32.1573	-2436.78
170214n8	thoracic	Premotor	mCherry	TA	241.287	150.806	-2436.78
170214n8	thoracic	Premotor	mCherry	TA	162.637	74.5098	-2405.17
170214n8	thoracic	Premotor	mCherry	TA	310.989	76.4706	-2405.17
170214n8	thoracic	Premotor	mCherry	TA	-139.896	-158.889	-2373.56
170214n8	thoracic	Premotor	mCherry	TA	185.013	-310.276	-2341.95
170214n8	thoracic	Premotor	mCherry	TA	174.677	151.897	-2341.95
170214n8	thoracic	Premotor	mCherry	TA	-241.86	-71.7573	-2310.34
170214n8	thoracic	Premotor	mCherry	TA	7.80488	-54.0123	-2215.52
170214n8	thoracic	Premotor	mCherry	TA	-201.481	107.827	-2215.52
170214n8	thoracic	Premotor	mCherry	TA	225.366	121.157	-2215.52
170214n8	thoracic	Premotor	mCherry	TA	-210.37	226.52	-2215.52
170214n8	thoracic	Premotor	mCherry	TA	-282.828	-27.551	-2183.91
170214n8	thoracic	Premotor	mCherry	TA	-251.515	-11.2245	-2183.91
170214n8	thoracic	Premotor	mCherry	TA	237.413	168.426	-2183.91
170214n8	thoracic	Premotor	mCherry	TA	-266.667	-71.7949	-2152.3
170214n8	thoracic	Premotor	mCherry	TA	357.843	48.3621	-2152.3
170214n8	thoracic	Premotor	mCherry	TA	332.308	-151.632	-2120.69
170214n8	thoracic	Premotor	mCherry	TA	57.732	23.2692	-2057.47
170214n8	thoracic	Premotor	mCherry	TA	265.979	142.788	-2057.47
170214n8	thoracic	Premotor	mCherry	TA	71.7325	16.5725	-2025.86
170214n8	thoracic	Premotor	mCherry	TA	250.562	28.0851	-1994.25
170214n8	thoracic	Premotor	mCherry	TA	341.547	236.015	-1962.64
170214n8	thoracic	Premotor	mCherry	TA	-148.607	286.438	-1962.64
170214n8	thoracic	Premotor	mCherry	TA	-149.865	-278.483	-1899.43
170214n8	thoracic	Premotor	mCherry	TA	310.024	196.011	-1804.6
170214n8	thoracic	Premotor	mCherry	TA	-224.561	-32.1429	-1741.38
170214n8	thoracic	Premotor	mCherry	TA	337.463	17.3913	-1709.77
170214n8	thoracic	Premotor	mCherry	TA	305.605	107.609	-1709.77
170214n8	thoracic	Premotor	mCherry	TA	-92.8367	-143.617	-1678.16
170214n8	thoracic	Premotor	mCherry	TA	132.872	117.938	-1614.94
170214n8	thoracic	Premotor	mCherry	TA	-197.834	-51.5789	-1488.51
170214n8	thoracic	Premotor	mCherry	TA	-95.6522	-159.288	-1425.29
170214n8	thoracic	Premotor	mCherry	TA	-193.789	-65.0155	-1425.29
170214n8	thoracic	Premotor	mCherry	TA	321.708	96.1053	-1362.07
170214n8	thoracic	Premotor	mCherry	TA	-159.17	164.409	-1362.07
170214n8	thoracic	Premotor	mCherry	TA	-90.5923	-120.863	-1235.63
170214n8	thoracic	Premotor	mCherry	TA	-98.9547	-15.1079	-1235.63
170214n8	thoracic	Premotor	mCherry	TA	-146.866	-154.18	-1140.8
170214n8	thoracic	Premotor	mCherry	TA	-208.955	-126.045	-1140.8
170214n8	thoracic	Premotor	mCherry	TA	333.813	50.4167	-1077.59
170214n8	thoracic	Premotor	mCherry	TA	167.606	-51.0949	-1014.37
170214n8	thoracic	Premotor	mCherry	TA	-22.6148	-102.867	-982.759
170214n8	thoracic	Premotor	mCherry	TA	17.8082	10.4211	-982.759
170214n8	thoracic	Premotor	mCherry	TA	335.836	-123.39	-919.54
170214n8	thoracic	Premotor	mCherry	TA	285.324	135.15	-919.54
170214n8	thoracic	Premotor	mCherry	TA	234.944	-78.2197	-793.103
170214n8	thoracic	Premotor	mCherry	TA	277.273	130.108	-761.494
170214n8	thoracic	Premotor	mCherry	TA	165.854	-76.5993	-635.057
170214n8	thoracic	Premotor	mCherry	TA	-215.73	-1.36187	-635.057
170214n8	thoracic	Premotor	mCherry	TA	-81.6667	-143.726	-571.839
170214n8	thoracic	Premotor	mCherry	TA	408.759	251.695	-571.839
170214n8	thoracic	Premotor	mCherry	TA	-110.701	12.6437	-413.793
170214n8	thoracic	Premotor	mCherry	TA	-228.975	-118.153	-224.138
170214n8	thoracic	Premotor	mCherry	TA	-266.094	-144.737	123.563
170214n8	thoracic	Premotor	mCherry	TA	315.152	-50.7634	250
170214n8	thoracic	Premotor	mCherry	TA	-52.6316	-133.951	408.046
170214n8	thoracic	Premotor	mCherry	TA	-184.615	-30.0373	471.264
170214n8	thoracic	Premotor	mCherry	TA	-206.25	-284.457	660.92
170214n8	thoracic	Premotor	mCherry	TA	92.4188	5.14019	660.92
170214n8	thoracic	Premotor	mCherry	TA	247.619	-232.443	692.529
170214n8	thoracic	Premotor	mCherry	TA	256	46.6981	724.138
170214n8	thoracic	Premotor	mCherry	TA	7.27273	78.3908	755.747
170214n8	thoracic	Premotor	mCherry	TA	318.491	3.85514	1071.84
170214n8	thoracic	Premotor	mCherry	TA	230.303	85.9375	1135.06
170214n8	thoracic	Premotor	mCherry	TA	270.4	66.443	1166.67
170214n8	thoracic	Premotor	mCherry	TA	280.727	172.26	1293.1
170214n8	thoracic	Premotor	mCherry	TA	-127.719	-134.124	1324.71
170214n8	thoracic	Premotor	mCherry	TA	197.143	-245.122	1356.32
170214n8	thoracic	Premotor	mCherry	TA	312.121	153.953	1387.93
170214n8	thoracic	Premotor	mCherry	TA	-76.4045	-84.1924	1451.15
170214n8	thoracic	Premotor	mCherry	TA	-64.2336	6.20767	1514.37
170214n8	thoracic	Premotor	mCherry	TA	47.8632	18.0131	1609.2
170214n8	thoracic	Premotor	mCherry	TA	248.101	-206.441	1672.41
170214n8	thoracic	Premotor	mCherry	TA	-67.6385	-124.08	1830.46
170214n8	thoracic	Premotor	mCherry	TA	-242.105	218.402	1925.29
170214n8	thoracic	Premotor	mCherry	TA	53.4031	2.51716	2020.11
170214n8	thoracic	Premotor	mCherry	TA	6.21762	-131.111	-2373.56
170125n7	thoracic	Premotor	divergent	TAPL	-182.938	-89.9083	-2460.99
170125n7	thoracic	Premotor	divergent	TAPL	-239.815	-97.4478	-2421.99
170125n7	thoracic	Premotor	divergent	TAPL	-181.53	-91.6309	-2343.97
170125n7	thoracic	Premotor	divergent	TAPL	-192.07	-133.92	-2226.95
170125n7	thoracic	Premotor	divergent	TAPL	309.133	243.353	-2226.95
170125n7	thoracic	Premotor	divergent	TAPL	-251.054	-138.197	-1875.89
170125n7	thoracic	Premotor	divergent	TAPL	184.906	84.9421	-1875.89
170125n7	thoracic	Premotor	divergent	TAPL	-206.089	-75.6322	-1758.87
170125n7	thoracic	Premotor	divergent	TAPL	-238.631	-120.608	-1524.82
170125n7	thoracic	Premotor	divergent	TAPL	320.69	202.935	-1524.82
170125n7	thoracic	Premotor	divergent	TAPL	315.974	187.045	-1290.78
170125n7	thoracic	Premotor	divergent	TAPL	280.851	181.594	-978.723
170125n7	thoracic	Premotor	divergent	TAPL	37.3757	34.7826	-627.66
170125n7	thoracic	Premotor	divergent	TAPL	305.499	186.327	-510.638
170125n7	thoracic	Premotor	divergent	TAPL	343.875	169.714	347.518
170125n7	thoracic	Premotor	divergent	TAPL	-227.358	-82.8947	1049.65
170125n7	thoracic	Premotor	divergent	TAPL	316.279	199.614	1712.77
170125n7	thoracic	Premotor	divergent	TAPL	318.027	206.674	1829.79
170125n7	thoracic	Premotor	divergent	TAPL	340.562	214.354	2258.87
170125n7	thoracic	Premotor	divergent	TAPL	-259.286	-144.118	2414.89
170214n8	thoracic	Premotor	divergent	TAPL	375.13	-51.3889	-2373.56
170214n8	thoracic	Premotor	divergent	TAPL	344.186	79.2868	-2341.95
170214n8	thoracic	Premotor	divergent	TAPL	325.606	163.153	-2310.34
170214n8	thoracic	Premotor	divergent	TAPL	391.795	-38.4273	-2120.69
170214n8	thoracic	Premotor	divergent	TAPL	291.793	217.514	-2025.86
170214n8	thoracic	Premotor	divergent	TAPL	373.034	-72.9682	-1994.25
170214n8	thoracic	Premotor	divergent	TAPL	384.57	202.021	-1583.33
170214n8	thoracic	Premotor	divergent	TAPL	413.187	122.635	-1551.72
170214n8	thoracic	Premotor	divergent	TAPL	301.779	167.338	-1172.41
170214n8	thoracic	Premotor	divergent	TAPL	286.64	53.5019	-477.011
170214n8	thoracic	Premotor	divergent	TAPL	375.719	205.952	-224.138
170214n8	thoracic	Premotor	divergent	TAPL	294.203	147.685	-66.092
170214n8	thoracic	Premotor	divergent	TAPL	377.922	223.406	408.046
170214n8	thoracic	Premotor	divergent	TAPL	353.846	204.977	850.575
170214n8	thoracic	Premotor	divergent	TAPL	323.077	170.127	1419.54
170214n8	thoracic	Premotor	divergent	TAPL	299.435	182.898	1640.8
170214n8	thoracic	Premotor	divergent	TAPL	277.966	182.898	1640.8
170214n8	thoracic	Premotor	divergent	TAPL	267.662	206.25	2873.56
170214n8	thoracic	Premotor	mCherry	TA	206.452	208.522	non available
170214n8	thoracic	Premotor	mCherry	TA	243.678	250.082	non available
