# Supplementary material for: Proximal and distal spinal neurons innervating multiple synergist and antagonist motor pools
Source: eLife. 2021 Nov 2;10:e70858. doi: 10.7554/eLife.70858 (PMC8631798; doi:10.7554/eLife.70858)
Supplement: Figure 2—source data 1. [file elife-70858-fig2-data1.xlsx]

## Sheet: Figure 2B-H
Sample	Part of Spinal Cord	Identity	labelling	Muscles	Medio_Lateral	Dorso_Ventral
170503n6	thoracic	Premotor	eGFP	LG	347.484	176.88
170503n6	thoracic	Premotor	eGFP	LG	276.38	31.3077
170503n6	thoracic	Premotor	eGFP	LG	300.221	234.385
170503n6	thoracic	Premotor	eGFP	LG	230.103	-163.273
170503n6	thoracic	Premotor	eGFP	LG	4.12371	-113.66
170503n6	thoracic	Premotor	eGFP	LG	-119.171	-64.5455
170503n6	thoracic	Premotor	eGFP	LG	148.696	79.0572
170503n6	thoracic	Premotor	eGFP	LG	-98.8662	-56.2648
170503n6	thoracic	Premotor	eGFP	LG	-164.172	-12.4113
170503n6	thoracic	Premotor	eGFP	LG	346.269	208.682
170503n6	thoracic	Premotor	eGFP	LG	-107.654	-89.1055
170503n6	thoracic	Premotor	eGFP	LG	138.596	48.0092
170503n6	thoracic	Premotor	eGFP	LG	-69.6104	-113.613
170503n6	thoracic	Premotor	eGFP	LG	273.286	-2.05882
170503n6	thoracic	Premotor	eGFP	LG	388.785	206.045
170503n6	thoracic	Premotor	eGFP	LG	137.688	162.462
170503n6	thoracic	Premotor	eGFP	LG	279.787	2.38095
170503n6	thoracic	Premotor	eGFP	LG	-180.577	-143.684
170503n6	thoracic	Premotor	eGFP	LG	326.034	-95.4545
170503n6	thoracic	Premotor	eGFP	LG	293.917	24.4444
170503n6	thoracic	Premotor	eGFP	LG	236.496	66.8148
170503n6	thoracic	Premotor	eGFP	LG	-152.381	-180.947
170503n6	thoracic	Premotor	eGFP	LG	-183.375	-199.5
170503n6	thoracic	Premotor	eGFP	LG	-156.171	-159.25
170503n6	thoracic	Premotor	eGFP	LG	377.551	100
170503n6	thoracic	Premotor	eGFP	LG	-97.3822	-31.25
170503n6	thoracic	Premotor	eGFP	LG	-89.5522	-73.2143
170503n6	thoracic	Premotor	eGFP	LG	-207.33	-278.429
170503n6	thoracic	Premotor	eGFP	LG	28.3465	-32.4438
170503n6	thoracic	Premotor	eGFP	LG	302.362	183.333
170503n6	thoracic	Premotor	eGFP	LG	333.858	285.386
170503n6	thoracic	Premotor	eGFP	LG	-190.933	-83.4152
170503n6	thoracic	Premotor	eGFP	LG	307.368	185.691
170503n6	thoracic	Premotor	eGFP	LG	-157.412	-91.8033
170503n6	thoracic	Premotor	eGFP	LG	-119.171	-161.08
170503n6	thoracic	Premotor	eGFP	LG	203.675	-64.6307
170503n6	thoracic	Premotor	eGFP	LG	-103.627	240.625
170503n6	thoracic	Premotor	eGFP	LG	274.687	-73.0061
170503n6	thoracic	Premotor	eGFP	LG	189.474	-63.3436
170503n6	thoracic	Premotor	eGFP	LG	331.83	-18.2515
170503n6	thoracic	Premotor	eGFP	LG	-193.064	-185.733
170503n6	thoracic	Premotor	eGFP	LG	321.693	15.9677
170503n6	thoracic	Premotor	eGFP	LG	281.934	-116.022
170503n6	thoracic	Premotor	eGFP	LG	-13.8728	53.0888
170503n6	thoracic	Premotor	eGFP	LG	276.845	110
170503n6	thoracic	Premotor	eGFP	LG	11.1801	-168.481
170503n6	thoracic	Premotor	eGFP	LG	331.677	146.727
170503n6	thoracic	Premotor	eGFP	LG	-258.462	173.796
170503n6	thoracic	Premotor	eGFP	LG	-100	-65.1961
170503n6	thoracic	Premotor	eGFP	LG	187.258	-28.9174
170503n6	thoracic	Premotor	eGFP	LG	315.789	156.759
170503n6	thoracic	Premotor	eGFP	LG	100	-119.583
170503n6	thoracic	Premotor	eGFP	LG	-258.892	-132.789
170503n6	thoracic	Premotor	eGFP	LG	277.477	-119.412
170503n6	thoracic	Premotor	eGFP	LG	-115.452	-116.08
170503n6	thoracic	Premotor	eGFP	LG	-76.9679	0
170503n6	thoracic	Premotor	eGFP	LG	276.276	148.824
170503n6	thoracic	Premotor	eGFP	LG	245.455	128.744
170503n6	thoracic	Premotor	eGFP	LG	-161.755	-82.1333
170503n6	thoracic	Premotor	eGFP	LG	261.318	252.124
170503n6	thoracic	Premotor	eGFP	LG	-290.446	-91.875
170503n6	thoracic	Premotor	eGFP	LG	38.4181	42.8442
170503n6	thoracic	Premotor	eGFP	LG	-194.562	-148.537
170503n6	thoracic	Premotor	eGFP	LG	259.88	-41.922
170503n6	thoracic	Premotor	eGFP	LG	383.481	168.486
170503n6	thoracic	Premotor	eGFP	LG	-100.599	-147.036
170503n6	thoracic	Premotor	eGFP	LG	233.245	-132.923
170503n6	thoracic	Premotor	eGFP	LG	-282.635	-143.87
170503n6	thoracic	Premotor	eGFP	LG	20.3593	-186.602
170503n6	thoracic	Premotor	eGFP	LG	287.24	-19.943
170503n6	thoracic	Premotor	eGFP	LG	-114.286	-85.4962
170503n6	thoracic	Premotor	eGFP	LG	-26.5896	-24.0196
170503n6	thoracic	Premotor	eGFP	LG	152.436	-16.8449
170503n6	thoracic	Premotor	eGFP	LG	117.26	-284.254
170503n6	thoracic	Premotor	eGFP	LG	-63.2836	-55.7007
170503n6	thoracic	Premotor	eGFP	LG	-268.404	-132.878
170503n6	thoracic	Premotor	eGFP	LG	-74.2671	-24.3176
170503n6	thoracic	Premotor	eGFP	LG	90.4762	-18.3727
170503n6	thoracic	Premotor	eGFP	LG	-144.706	-126.034
170503n6	thoracic	Premotor	eGFP	LG	-121.176	-1.70316
170503n6	thoracic	Premotor	eGFP	LG	206.414	-171.373
170503n6	thoracic	Premotor	eGFP	LG	-172.581	20.4064
170503n6	thoracic	Premotor	eGFP	LG	310.345	126.521
170503n6	thoracic	Premotor	eGFP	LG	294.253	151.616
170503n6	thoracic	Premotor	eGFP	LG	323.692	164.179
170503n6	thoracic	Premotor	eGFP	LG	-123.529	-101.866
170503n6	thoracic	Premotor	eGFP	LG	-20.9913	-11.519
170503n6	thoracic	Premotor	eGFP	LG	-139.938	-213.747
170503n6	thoracic	Premotor	eGFP	LG	-164.706	-91.9708
170503n6	thoracic	Premotor	eGFP	LG	-186.35	-268.56
170503n6	thoracic	Premotor	eGFP	LG	257.963	180.136
170503n6	thoracic	Premotor	eGFP	LG	248.593	-75
170503n6	thoracic	Premotor	eGFP	LG	253.018	114.835
170503n6	thoracic	Premotor	eGFP	LG	-156.568	-243.205
170503n6	thoracic	Premotor	eGFP	LG	316.962	142.342
170503n6	thoracic	Premotor	eGFP	LG	-228.261	-130.31
170503n6	thoracic	Premotor	eGFP	LG	311.346	-79.0049
170503n6	thoracic	Premotor	eGFP	LG	-114.416	-168.686
170503n6	thoracic	Premotor	eGFP	LG	40.0911	-34.125
170503n6	thoracic	Premotor	eGFP	LG	336.522	209.115
170503n6	thoracic	Premotor	eGFP	LG	-184.816	-144.29
170503n6	thoracic	Premotor	eGFP	LG	-109.347	-52.4609
170503n6	thoracic	Premotor	eGFP	LG	-163.91	-238.443
170427n2	thoracic	Premotor	eGFP	LG	-133.913	-242.793
170427n2	thoracic	Premotor	eGFP	LG	359.56	-107.902
170427n2	thoracic	Premotor	eGFP	LG	-327.619	253.267
170427n2	thoracic	Premotor	eGFP	LG	345.669	124.631
170427n2	thoracic	Premotor	eGFP	LG	-302.646	12.32
170427n2	thoracic	Premotor	eGFP	LG	-309.845	-21.0383
170427n2	thoracic	Premotor	eGFP	LG	140.215	34.2593
170427n2	thoracic	Premotor	eGFP	LG	-303.485	72.3214
170427n2	thoracic	Premotor	eGFP	LG	-161.538	-112.037
170427n2	thoracic	Premotor	eGFP	LG	175.584	63.0208
170427n2	thoracic	Premotor	eGFP	LG	328.177	54.2517
170427n2	thoracic	Premotor	eGFP	LG	217.68	15.9014
170427n2	thoracic	Premotor	eGFP	LG	-217.08	-91.9492
170427n2	thoracic	Premotor	eGFP	LG	29.0503	-90.785
170427n2	thoracic	Premotor	eGFP	LG	-233.735	-116.338
170427n2	thoracic	Premotor	eGFP	LG	70.0809	13
170427n2	thoracic	Premotor	eGFP	LG	-90.4762	-26.3006
170427n2	thoracic	Premotor	eGFP	LG	-138.012	-71.8182
170427n2	thoracic	Premotor	eGFP	LG	89.8876	110.199
170427n2	thoracic	Premotor	eGFP	LG	268.889	26.9811
170427n2	thoracic	Premotor	eGFP	LG	30.4762	3.94265
170427n2	thoracic	Premotor	eGFP	LG	-13.2931	227.894
170427n2	thoracic	Premotor	eGFP	LG	-156.522	-30.9451
170427n2	thoracic	Premotor	eGFP	LG	-19.1693	-37.9404
170427n2	thoracic	Premotor	eGFP	LG	18.0282	52.2727
170427n2	thoracic	Premotor	eGFP	LG	-18.1269	60.3792
170427n2	thoracic	Premotor	eGFP	LG	368.652	163.081
170427n2	thoracic	Premotor	eGFP	LG	105.775	58.2627
170427n2	thoracic	Premotor	eGFP	LG	301.655	171.429
170427n2	thoracic	Premotor	eGFP	LG	-110.983	-23.3957
170427n2	thoracic	Premotor	eGFP	LG	91.018	23.9965
170427n3	thoracic	Premotor	eGFP	LG	348.255	78.4426
170427n3	thoracic	Premotor	eGFP	LG	265.298	-48.6111
170427n3	thoracic	Premotor	eGFP	LG	297.804	-70.4082
170427n3	thoracic	Premotor	eGFP	LG	266.165	135.955
170427n3	thoracic	Premotor	eGFP	LG	361.654	35.313
170427n3	thoracic	Premotor	eGFP	LG	412.782	8.82825
170427n3	thoracic	Premotor	eGFP	LG	386.233	10.2484
170427n3	thoracic	Premotor	eGFP	LG	220.043	78.5714
170427n3	thoracic	Premotor	eGFP	LG	-193.135	-161.609
170427n3	thoracic	Premotor	eGFP	LG	-275.991	17.134
170427n3	thoracic	Premotor	eGFP	LG	148.046	144.597
170427n3	thoracic	Premotor	eGFP	LG	-151.02	-120.942
170427n3	thoracic	Premotor	eGFP	LG	127.094	141.79
170427n3	thoracic	Premotor	eGFP	LG	385.93	30.3448
170427n3	thoracic	Premotor	eGFP	LG	-227.762	-66.8975
170427n3	thoracic	Premotor	eGFP	LG	375.49	-4.80769
170427n3	thoracic	Premotor	eGFP	LG	220.649	296.154
170427n3	thoracic	Premotor	eGFP	LG	69.6165	30.3512
170427n3	thoracic	Premotor	eGFP	LG	52.3364	-163
170427n3	thoracic	Premotor	eGFP	LG	267.442	159.736
170427n3	thoracic	Premotor	eGFP	LG	267.119	62.037
170427n3	thoracic	Premotor	eGFP	LG	-142.765	-98.3471
170427n3	thoracic	Premotor	eGFP	LG	-136.338	-97.3829
170427n3	thoracic	Premotor	eGFP	LG	137.024	125.926
170427n3	thoracic	Premotor	eGFP	LG	315.278	53.3118
170427n3	thoracic	Premotor	eGFP	LG	138.065	-181.213
170427n3	thoracic	Premotor	eGFP	LG	319.218	123.152
170427n3	thoracic	Premotor	eGFP	LG	215.385	-152.537
170427n3	thoracic	Premotor	eGFP	LG	327.397	181.278
170427n3	thoracic	Premotor	eGFP	LG	82.4324	196.882
170427n3	thoracic	Premotor	eGFP	LG	219.737	74.1304
170427n3	thoracic	Premotor	eGFP	LG	-165.753	-96.3483
170427n3	thoracic	Premotor	eGFP	LG	-211.321	252.421
170503n6	thoracic	Premotor	divergent	LGTA	253.422	197.154
170503n6	thoracic	Premotor	divergent	LGTA	383.505	260
170503n6	thoracic	Premotor	divergent	LGTA	365.217	174.266
170503n6	thoracic	Premotor	divergent	LGTA	-214.423	-59.6692
170503n6	thoracic	Premotor	divergent	LGTA	355.231	221.63
170503n6	thoracic	Premotor	divergent	LGTA	261.224	200.945
170503n6	thoracic	Premotor	divergent	LGTA	405.698	2.5741
170503n6	thoracic	Premotor	divergent	LGTA	308.832	220.515
170503n6	thoracic	Premotor	divergent	LGTA	-188.482	-66.3342
170503n6	thoracic	Premotor	divergent	LGTA	-180.267	-97.1744
170503n6	thoracic	Premotor	divergent	LGTA	274.737	173.312
170503n6	thoracic	Premotor	divergent	LGTA	-290.027	-163.525
170503n6	thoracic	Premotor	divergent	LGTA	273.791	129.25
170503n6	thoracic	Premotor	divergent	LGTA	261.364	128.238
170503n6	thoracic	Premotor	divergent	LGTA	322.727	-57.8261
170503n6	thoracic	Premotor	divergent	LGTA	284.663	188.571
170503n6	thoracic	Premotor	divergent	LGTA	-176.774	-61.25
170503n6	thoracic	Premotor	divergent	LGTA	302.065	173.327
170503n6	thoracic	Premotor	divergent	LGTA	316.914	169.459
170503n6	thoracic	Premotor	divergent	LGTA	315.663	174.483
170503n6	thoracic	Premotor	divergent	LGTA	252.381	-47.769
170503n6	thoracic	Premotor	divergent	LGTA	-14.5455	-42.7873
170503n6	thoracic	Premotor	divergent	LGTA	244.248	196.986
170503n6	thoracic	Premotor	divergent	LGTA	324.786	185.688
170503n6	thoracic	Premotor	divergent	LGTA	172.08	301.743
170503n6	thoracic	Premotor	divergent	LGTA	289.474	-25.9591
170503n6	thoracic	Premotor	divergent	LGTA	332.632	160.374
170503n6	thoracic	Premotor	divergent	LGTA	224.924	201.534
170503n6	thoracic	Premotor	divergent	LGTA	307.527	167.021
170503n6	thoracic	Premotor	divergent	LGTA	44.6927	69.8895
170503n6	thoracic	Premotor	divergent	LGTA	-188.166	-146.588
170503n6	thoracic	Premotor	divergent	LGTA	307.104	161.704
170503n6	thoracic	Premotor	divergent	LGTA	-128.492	-156.279
170503n6	thoracic	Premotor	divergent	LGTA	259.2	180.769
170503n6	thoracic	Premotor	divergent	LGTA	53.3333	248.356
170503n6	thoracic	Premotor	divergent	LGTA	318.325	169.527
170503n6	thoracic	Premotor	divergent	LGTA	297.382	181.086
170503n6	thoracic	Premotor	divergent	LGTA	283.544	-71.5328
170503n6	thoracic	Premotor	divergent	LGTA	300.971	101.61
170503n6	thoracic	Premotor	divergent	LGTA	376.201	159.304
170503n6	thoracic	Premotor	divergent	LGTA	221.296	313.313
170503n6	thoracic	Premotor	divergent	LGTA	307.477	183.962
170503n6	thoracic	Premotor	divergent	LGTA	303.215	83.4421
170503n6	thoracic	Premotor	divergent	LGTA	118.443	251.224
170503n6	thoracic	Premotor	divergent	LGTA	-182.752	-147.578
170427n2	thoracic	Premotor	divergent	LGTA	-153.776	-269.377
170427n2	thoracic	Premotor	divergent	LGTA	-225.121	-113.514
170427n2	thoracic	Premotor	divergent	LGTA	391.367	-4.19162
170427n2	thoracic	Premotor	divergent	LGTA	-218.076	-138.56
170427n2	thoracic	Premotor	divergent	LGTA	179.104	106.716
170427n2	thoracic	Premotor	divergent	LGTA	364.179	10.0332
170427n2	thoracic	Premotor	divergent	LGTA	271.468	109.369
170427n2	thoracic	Premotor	divergent	LGTA	301.911	2.11946
170427n2	thoracic	Premotor	divergent	LGTA	274.052	191.128
170427n3	thoracic	Premotor	divergent	LGTA	305.263	6.17978
170427n3	thoracic	Premotor	divergent	LGTA	254.618	178.355
170427n3	thoracic	Premotor	divergent	LGTA	230.805	153.468
170427n3	thoracic	Premotor	divergent	LGTA	364.103	21.3247
170427n3	thoracic	Premotor	divergent	LGTA	333.564	97.9296
170503n6	thoracic	Premotor	mCherry	TA	42.8884	-86.409
170503n6	thoracic	Premotor	mCherry	TA	247.702	151.36
170503n6	thoracic	Premotor	mCherry	TA	163.676	205.04
170503n6	thoracic	Premotor	mCherry	TA	-143.891	-79.0588
170503n6	thoracic	Premotor	mCherry	TA	170.419	56.6923
170503n6	thoracic	Premotor	mCherry	TA	-98.6175	-142.298
170503n6	thoracic	Premotor	mCherry	TA	379.13	-28.8915
170503n6	thoracic	Premotor	mCherry	TA	-97.4093	24.6858
170503n6	thoracic	Premotor	mCherry	TA	242.609	110.51
170503n6	thoracic	Premotor	mCherry	TA	341.309	-24.7059
170503n6	thoracic	Premotor	mCherry	TA	238.375	11.3905
170503n6	thoracic	Premotor	mCherry	TA	329.078	-123.529
170503n6	thoracic	Premotor	mCherry	TA	371.631	45.0431
170125n3	thoracic	Premotor	eGFP	LG	-93.4673	-202.632
170125n3	thoracic	Premotor	eGFP	LG	-108.543	-205.144
170125n3	thoracic	Premotor	eGFP	LG	255.502	178.983
170125n3	thoracic	Premotor	eGFP	LG	-228.959	-211.649
170125n3	thoracic	Premotor	eGFP	LG	-69.3333	-115.678
170125n3	thoracic	Premotor	eGFP	LG	313.002	202.844
170125n3	thoracic	Premotor	eGFP	LG	-138.865	-144.275
170125n3	thoracic	Premotor	eGFP	LG	-9.24855	-60.2828
170125n3	thoracic	Premotor	eGFP	LG	-114.121	8.38095
170125n3	thoracic	Premotor	eGFP	LG	-18.8976	-113.636
170125n3	thoracic	Premotor	eGFP	LG	-72.0721	-175.507
170125n3	thoracic	Premotor	eGFP	LG	355.432	184.418
170125n3	thoracic	Premotor	eGFP	LG	140.434	150.84
170125n3	thoracic	Premotor	eGFP	LG	-21.9653	-47.3624
170125n3	thoracic	Premotor	eGFP	LG	-83.0769	-9.57711
170125n3	thoracic	Premotor	eGFP	LG	52.8846	-106.599
170125n3	thoracic	Premotor	eGFP	LG	-101.01	-56.9575
170125n3	thoracic	Premotor	eGFP	LG	-166.845	-243.084
170125n3	thoracic	Premotor	eGFP	LG	45.1444	-44.8438
170125n3	thoracic	Premotor	eGFP	LG	15.4589	-55.9621
170125n3	thoracic	Premotor	eGFP	LG	263.86	119.832
170125n3	thoracic	Premotor	eGFP	LG	-196.907	-102.204
170508n7	thoracic	Premotor	eGFP	LG	283.412	-63.4804
170508n7	thoracic	Premotor	eGFP	LG	-96.0836	16.5414
170508n7	thoracic	Premotor	eGFP	LG	-144.125	-125.263
170508n7	thoracic	Premotor	eGFP	LG	314	-102.398
170508n7	thoracic	Premotor	eGFP	LG	217	-21.8225
170508n7	thoracic	Premotor	eGFP	LG	13	56.9298
170508n7	thoracic	Premotor	eGFP	LG	-134.015	33.7308
170508n7	thoracic	Premotor	eGFP	LG	301.867	-150.377
170508n7	thoracic	Premotor	eGFP	LG	-79.798	-97.3829
170508n7	thoracic	Premotor	eGFP	LG	342.119	-139.646
170508n7	thoracic	Premotor	eGFP	LG	290.704	-115.815
170508n7	thoracic	Premotor	eGFP	LG	-118.447	-122.949
170508n7	thoracic	Premotor	eGFP	LG	-175.728	-52.0513
170508n7	thoracic	Premotor	eGFP	LG	-195.146	-97.8205
170508n7	thoracic	Premotor	eGFP	LG	338.381	-164.912
170508n7	thoracic	Premotor	eGFP	LG	293.617	146.034
170508n7	thoracic	Premotor	eGFP	LG	246.809	174.483
170508n7	thoracic	Premotor	eGFP	LG	333.696	140.901
170508n7	thoracic	Premotor	eGFP	LG	329.805	199.02
170508n7	thoracic	Premotor	eGFP	LG	300.836	58.8235
170508n7	thoracic	Premotor	eGFP	LG	340.541	105.694
170508n7	thoracic	Premotor	eGFP	LG	168.649	-250.651
170508n7	thoracic	Premotor	eGFP	LG	-151.111	-56.3003
170508n7	thoracic	Premotor	eGFP	LG	343.455	-57.6167
170508n7	thoracic	Premotor	eGFP	LG	103.627	-227.847
170508n7	thoracic	Premotor	eGFP	LG	-141.667	-48.3073
170508n7	thoracic	Premotor	eGFP	LG	-173.958	-167.708
170508n7	thoracic	Premotor	eGFP	LG	318.717	132
170508n7	thoracic	Premotor	eGFP	LG	310.16	67
170508n7	thoracic	Premotor	eGFP	LG	182.888	-1.74564
170508n7	thoracic	Premotor	eGFP	LG	307.246	159.317
170508n7	thoracic	Premotor	eGFP	LG	-190.13	-97.526
170508n7	thoracic	Premotor	eGFP	LG	-252.468	-74.7396
170508n7	thoracic	Premotor	eGFP	LG	259.944	40.9256
170508n7	thoracic	Premotor	eGFP	LG	-116.711	-103.865
170508n7	thoracic	Premotor	eGFP	LG	215.385	121.387
170508n7	thoracic	Premotor	eGFP	LG	12.7536	-46.5517
170508n7	thoracic	Premotor	eGFP	LG	-52.3077	-60.992
170508n7	thoracic	Premotor	eGFP	LG	126.857	-21.9321
170508n7	thoracic	Premotor	eGFP	LG	-201.635	-143.473
170508n7	thoracic	Premotor	eGFP	LG	265.537	-27.1318
170508n7	thoracic	Premotor	eGFP	LG	6.77966	173.684
170508n7	thoracic	Premotor	eGFP	LG	-282	-163.973
170508n7	thoracic	Premotor	eGFP	LG	261.714	182.657
170508n7	thoracic	Premotor	eGFP	LG	-241.595	-211.173
170508n7	thoracic	Premotor	eGFP	LG	-163.128	-141.276
170508n7	thoracic	Premotor	eGFP	LG	-124.862	-71.1382
170508n7	thoracic	Premotor	eGFP	LG	-103.467	-202.202
170508n7	thoracic	Premotor	eGFP	LG	122.449	129.038
170508n7	thoracic	Premotor	eGFP	LG	296.296	-81.0734
170508n7	thoracic	Premotor	eGFP	LG	-120	-123.861
170508n7	thoracic	Premotor	eGFP	LG	-135.135	-289.008
170508n7	thoracic	Premotor	eGFP	LG	19.0476	52.8431
170508n7	thoracic	Premotor	eGFP	LG	87.2093	202.467
170508n7	thoracic	Premotor	eGFP	LG	282.899	45.1336
170508n7	thoracic	Premotor	eGFP	LG	301.95	-64.4476
170508n7	thoracic	Premotor	eGFP	LG	213.031	98.6137
170508n7	thoracic	Premotor	eGFP	LG	285.057	176.454
170508n7	thoracic	Premotor	eGFP	LG	-169.821	-92.5926
170508n7	thoracic	Premotor	eGFP	LG	-184.143	-106.481
170508n7	thoracic	Premotor	eGFP	LG	306.087	205.972
170508n7	thoracic	Premotor	eGFP	LG	-118.67	-31.4714
170508n7	thoracic	Premotor	eGFP	LG	345.455	200.498
170508n7	thoracic	Premotor	eGFP	LG	364.543	179.787
170508n7	thoracic	Premotor	eGFP	LG	220.528	4.22265
170508n7	thoracic	Premotor	eGFP	LG	265.922	106.158
170508n7	thoracic	Premotor	eGFP	LG	242.458	215.485
170508n7	thoracic	Premotor	eGFP	LG	137.43	-1.75
170508n7	thoracic	Premotor	eGFP	LG	292.683	170.053
170508n7	thoracic	Premotor	eGFP	LG	-125.942	-306.897
170508n7	thoracic	Premotor	eGFP	LG	117.978	210.236
170508n7	thoracic	Premotor	eGFP	LG	329.412	-60
170508n7	thoracic	Premotor	eGFP	LG	-204.878	-236.512
170508n7	thoracic	Premotor	eGFP	LG	319.792	171.758
170508n7	thoracic	Premotor	eGFP	LG	-140.723	-68.1948
170508n7	thoracic	Premotor	eGFP	LG	266.353	75.7603
170508n7	thoracic	Premotor	eGFP	LG	267.22	200.095
170125n3	thoracic	Premotor	divergent	LGMG	292.269	149.445
170125n3	thoracic	Premotor	divergent	LGMG	233.18	178.2
170125n3	thoracic	Premotor	divergent	LGMG	-61.3811	-161.615
170125n3	thoracic	Premotor	divergent	LGMG	-80.8399	-136.364
170125n3	thoracic	Premotor	divergent	LGMG	45.7711	10.2062
170125n3	thoracic	Premotor	divergent	LGMG	-252.582	-124.744
170125n3	thoracic	Premotor	divergent	LGMG	411.043	205.762
170125n3	thoracic	Premotor	divergent	LGMG	264.531	138.031
170125n3	thoracic	Premotor	divergent	LGMG	40.7407	-23.9474
170125n3	thoracic	Premotor	divergent	LGMG	61.1111	-31.3158
170125n3	thoracic	Premotor	divergent	LGMG	292.774	216.318
170125n3	thoracic	Premotor	divergent	LGMG	320.403	176.476
170125n3	thoracic	Premotor	divergent	LGMG	336.735	-108.866
170125n3	thoracic	Premotor	divergent	LGMG	-107.143	-160.448
170508n7	thoracic	Premotor	divergent	LGMG	356.056	136.292
170508n7	thoracic	Premotor	divergent	LGMG	270.423	-20.438
170508n7	thoracic	Premotor	divergent	LGMG	287.206	171.048
170508n7	thoracic	Premotor	divergent	LGMG	268.12	-161.275
170508n7	thoracic	Premotor	divergent	LGMG	-146.77	-160.154
170508n7	thoracic	Premotor	divergent	LGMG	-196.419	-121.154
170508n7	thoracic	Premotor	divergent	LGMG	-76.2836	-119.643
170508n7	thoracic	Premotor	divergent	LGMG	263.305	114.791
170508n7	thoracic	Premotor	divergent	LGMG	-114.441	-213.838
170508n7	thoracic	Premotor	divergent	LGMG	277.987	144.843
170508n7	thoracic	Premotor	divergent	LGMG	67.2365	0
170508n7	thoracic	Premotor	divergent	LGMG	325.714	178.598
170508n7	thoracic	Premotor	divergent	LGMG	120.455	-121.26
170503n6	thoracic	Premotor	mCherry	TA	169.267	121.695
170503n6	thoracic	Premotor	mCherry	TA	306.383	131.178
170503n6	thoracic	Premotor	mCherry	TA	235.461	192.816
170503n6	thoracic	Premotor	mCherry	TA	253.428	198.348
170503n6	thoracic	Premotor	mCherry	TA	243.972	276.58
170503n6	thoracic	Premotor	mCherry	TA	-158.809	-112.247
170503n6	thoracic	Premotor	mCherry	TA	384.925	188.692
170503n6	thoracic	Premotor	mCherry	TA	250.251	192.077
170503n6	thoracic	Premotor	mCherry	TA	-271.96	224.575
170503n6	thoracic	Premotor	mCherry	TA	375.532	-23.842
170503n6	thoracic	Premotor	mCherry	TA	235.106	56.3492
170503n6	thoracic	Premotor	mCherry	TA	294.681	118.254
170503n6	thoracic	Premotor	mCherry	TA	284.694	296.22
170503n6	thoracic	Premotor	mCherry	TA	347.959	144.643
170503n6	thoracic	Premotor	mCherry	TA	220.408	157.143
170503n6	thoracic	Premotor	mCherry	TA	248.433	-132.153
170503n6	thoracic	Premotor	mCherry	TA	286.04	11.1544
170503n6	thoracic	Premotor	mCherry	TA	322.507	134.711
170503n6	thoracic	Premotor	mCherry	TA	267.677	162.727
170503n6	thoracic	Premotor	mCherry	TA	366.404	-34.4101
170503n6	thoracic	Premotor	mCherry	TA	365.354	209.524
170503n6	thoracic	Premotor	mCherry	TA	-152.185	-102.083
170503n6	thoracic	Premotor	mCherry	TA	282.105	7.9582
170503n6	thoracic	Premotor	mCherry	TA	366.753	26.2308
170503n6	thoracic	Premotor	mCherry	TA	340.157	-53.6932
170503n6	thoracic	Premotor	mCherry	TA	359.055	177.479
170503n6	thoracic	Premotor	mCherry	TA	253.409	252.2
170503n6	thoracic	Premotor	mCherry	TA	173.434	-146.012
170503n6	thoracic	Premotor	mCherry	TA	372.671	-11.0315
170503n6	thoracic	Premotor	mCherry	TA	265.839	212.439
170503n6	thoracic	Premotor	mCherry	TA	225.287	-35.2941
170503n6	thoracic	Premotor	mCherry	TA	298.851	152.568
170503n6	thoracic	Premotor	mCherry	TA	-117.718	108.733
170503n6	thoracic	Premotor	mCherry	TA	261.862	109.076
170503n6	thoracic	Premotor	mCherry	TA	302.273	164.716
170503n6	thoracic	Premotor	mCherry	TA	220.772	-3.85675
170503n6	thoracic	Premotor	mCherry	TA	137.536	-72.792
170503n6	thoracic	Premotor	mCherry	TA	-93.9759	-22.9058
170503n6	thoracic	Premotor	mCherry	TA	339.21	102.878
170503n6	thoracic	Premotor	mCherry	TA	171.594	156.44
170503n6	thoracic	Premotor	mCherry	TA	-201.183	-132.143
170503n6	thoracic	Premotor	mCherry	TA	-134.194	-124.25
170503n6	thoracic	Premotor	mCherry	TA	300.324	173.204
170503n6	thoracic	Premotor	mCherry	TA	-204.651	-89.6985
170503n6	thoracic	Premotor	mCherry	TA	-29.2359	-15.8291
170503n6	thoracic	Premotor	mCherry	TA	263.953	166.075
170503n6	thoracic	Premotor	mCherry	TA	228.916	45.098
170503n6	thoracic	Premotor	mCherry	TA	328.916	157.843
170503n6	thoracic	Premotor	mCherry	TA	260.661	202
170503n6	thoracic	Premotor	mCherry	TA	-173.913	-67.6845
170503n6	thoracic	Premotor	mCherry	TA	304.658	154.233
170503n6	thoracic	Premotor	mCherry	TA	272.877	169.753
170503n6	thoracic	Premotor	mCherry	TA	-41.791	-179.572
170503n6	thoracic	Premotor	mCherry	TA	-168.997	-102.542
170503n6	thoracic	Premotor	mCherry	TA	315.077	13.7011
170503n6	thoracic	Premotor	mCherry	TA	197.802	37.6977
170503n6	thoracic	Premotor	mCherry	TA	-271.856	-173.232
170503n6	thoracic	Premotor	mCherry	TA	-294.857	-51.6839
170503n6	thoracic	Premotor	mCherry	TA	282.353	-4.16667
170503n6	thoracic	Premotor	mCherry	TA	252.459	-57.2275
170503n6	thoracic	Premotor	mCherry	TA	248.533	154.688
170503n6	thoracic	Premotor	mCherry	TA	323.81	-90.099
170503n6	thoracic	Premotor	mCherry	TA	304.255	196.216
170503n6	thoracic	Premotor	mCherry	TA	91.4894	244.775
170503n6	thoracic	Premotor	mCherry	TA	321.505	-65.7895
170503n6	thoracic	Premotor	mCherry	TA	-289.247	-80.9045
170503n6	thoracic	Premotor	mCherry	TA	291.457	151.449
170503n6	thoracic	Premotor	mCherry	TA	109.763	251.349
170503n6	thoracic	Premotor	mCherry	TA	263.59	112.245
170503n6	thoracic	Premotor	mCherry	TA	281.297	79.9308
170503n6	thoracic	Premotor	mCherry	TA	-141.117	-177.04
170503n6	thoracic	Premotor	mCherry	TA	157.437	-143.765
170503n6	thoracic	Premotor	mCherry	TA	-145.178	-133.8
170503n6	thoracic	Premotor	mCherry	TA	208.411	167.925
170503n6	thoracic	Premotor	mCherry	TA	-154.93	-140.162
170503n6	thoracic	Premotor	mCherry	TA	310.247	138.696
170503n6	thoracic	Premotor	mCherry	TA	232.044	68.8766
170503n6	thoracic	Premotor	mCherry	TA	233.389	230.214
170427n2	thoracic	Premotor	mCherry	TA	352.511	93.9698
170427n2	thoracic	Premotor	mCherry	TA	200	-8.37766
170427n2	thoracic	Premotor	mCherry	TA	287.221	222.266
170427n2	thoracic	Premotor	mCherry	TA	79.5132	91.5214
170427n2	thoracic	Premotor	mCherry	TA	294.523	-101.801
170427n2	thoracic	Premotor	mCherry	TA	-226.281	-99.5935
170427n2	thoracic	Premotor	mCherry	TA	282.353	-102.77
170427n2	thoracic	Premotor	mCherry	TA	263.866	14.4737
170427n2	thoracic	Premotor	mCherry	TA	289.916	-50.3659
170427n2	thoracic	Premotor	mCherry	TA	237.524	184.528
170427n2	thoracic	Premotor	mCherry	TA	-130.871	-170.408
170427n2	thoracic	Premotor	mCherry	TA	128.416	86.4957
170427n2	thoracic	Premotor	mCherry	TA	261.345	184.686
170427n2	thoracic	Premotor	mCherry	TA	261.345	-123.861
170427n2	thoracic	Premotor	mCherry	TA	220.128	68.9863
170427n2	thoracic	Premotor	mCherry	TA	-214.684	-108.247
170427n2	thoracic	Premotor	mCherry	TA	322.056	130.314
170427n2	thoracic	Premotor	mCherry	TA	293.878	97.9201
170427n2	thoracic	Premotor	mCherry	TA	-166.839	-111.885
170427n2	thoracic	Premotor	mCherry	TA	145.376	93.5185
170427n2	thoracic	Premotor	mCherry	TA	275.829	103.356
170427n2	thoracic	Premotor	mCherry	TA	244.55	19.3792
170427n2	thoracic	Premotor	mCherry	TA	274.112	213.592
170427n2	thoracic	Premotor	mCherry	TA	127.919	44.4984
170427n2	thoracic	Premotor	mCherry	TA	273.381	178.656
170427n2	thoracic	Premotor	mCherry	TA	350.12	3.7415
170427n2	thoracic	Premotor	mCherry	TA	-226.273	-88.9037
170427n2	thoracic	Premotor	mCherry	TA	-135.244	-132.432
170427n2	thoracic	Premotor	mCherry	TA	185.203	-72.8669
170427n2	thoracic	Premotor	mCherry	TA	223.529	110.924
170427n2	thoracic	Premotor	mCherry	TA	-205.248	-104.37
170427n2	thoracic	Premotor	mCherry	TA	287.562	103.068
170427n2	thoracic	Premotor	mCherry	TA	222.34	158.524
170427n2	thoracic	Premotor	mCherry	TA	194.373	152.249
170427n2	thoracic	Premotor	mCherry	TA	273.247	172.83
170427n2	thoracic	Premotor	mCherry	TA	308.571	79.2535
170427n2	thoracic	Premotor	mCherry	TA	-151.807	-194.855
170427n2	thoracic	Premotor	mCherry	TA	305.943	88.8605
170427n2	thoracic	Premotor	mCherry	TA	345.856	59.8639
170427n2	thoracic	Premotor	mCherry	TA	-219.808	-117.608
170427n2	thoracic	Premotor	mCherry	TA	325.14	230.763
170427n2	thoracic	Premotor	mCherry	TA	138.547	24.6269
170427n2	thoracic	Premotor	mCherry	TA	363.128	-8.47751
170427n2	thoracic	Premotor	mCherry	TA	333.934	239.255
170427n2	thoracic	Premotor	mCherry	TA	296.697	199.22
170427n2	thoracic	Premotor	mCherry	TA	283.761	77.3132
170427n2	thoracic	Premotor	mCherry	TA	324.786	52.847
170427n2	thoracic	Premotor	mCherry	TA	-93.6937	-86.1675
170427n2	thoracic	Premotor	mCherry	TA	343.353	26.9022
170427n2	thoracic	Premotor	mCherry	TA	298.413	175.96
170427n2	thoracic	Premotor	mCherry	TA	264.55	159.872
170427n2	thoracic	Premotor	mCherry	TA	277.528	128.069
170427n2	thoracic	Premotor	mCherry	TA	314.921	150.806
170427n2	thoracic	Premotor	mCherry	TA	357.827	174.778
170427n2	thoracic	Premotor	mCherry	TA	295.208	6.11111
170427n2	thoracic	Premotor	mCherry	TA	316.19	-55.7627
170427n2	thoracic	Premotor	mCherry	TA	321.978	158.537
170427n2	thoracic	Premotor	mCherry	TA	285.873	-11.1821
170427n2	thoracic	Premotor	mCherry	TA	292.521	-29.0735
170427n2	thoracic	Premotor	mCherry	TA	131.818	198.73
170427n2	thoracic	Premotor	mCherry	TA	317.867	142.843
170427n2	thoracic	Premotor	mCherry	TA	-277.015	-154.902
170427n2	thoracic	Premotor	mCherry	TA	-293.731	-155.882
170427n2	thoracic	Premotor	mCherry	TA	389.969	125.775
170427n2	thoracic	Premotor	mCherry	TA	-271.01	-160.458
170427n2	thoracic	Premotor	mCherry	TA	-175.723	-204.947
170427n2	thoracic	Premotor	mCherry	TA	262.275	113.264
170427n2	thoracic	Premotor	mCherry	TA	326.946	-9.21053
170427n2	thoracic	Premotor	mCherry	TA	275.988	128.702
170427n3	thoracic	Premotor	mCherry	TA	380.723	-26.4706
170427n3	thoracic	Premotor	mCherry	TA	-221.891	-114.495
170427n3	thoracic	Premotor	mCherry	TA	245.596	29.0429
170427n3	thoracic	Premotor	mCherry	TA	179.412	46.9283
170427n3	thoracic	Premotor	mCherry	TA	-137.363	12.6437
170427n3	thoracic	Premotor	mCherry	TA	213.123	130.637
170427n3	thoracic	Premotor	mCherry	TA	234.903	139.101
170427n3	thoracic	Premotor	mCherry	TA	234.884	68.9769
170427n3	thoracic	Premotor	mCherry	TA	219.661	14.8148
170427n3	thoracic	Premotor	mCherry	TA	127.381	11.1486
170427n3	thoracic	Premotor	mCherry	TA	254.762	0
170427n3	thoracic	Premotor	mCherry	TA	364.331	-30.6647
170427n3	thoracic	Premotor	mCherry	TA	-186.466	-120.556
170427n3	thoracic	Premotor	mCherry	TA	314.983	182.904
170427n3	thoracic	Premotor	mCherry	TA	288.968	-52.6012
170508n7	thoracic	Premotor	divergent	LGMG	291.014	128.026
170508n7	thoracic	Premotor	divergent	LGMG	-132.632	-108.06
170508n7	thoracic	Premotor	divergent	LGMG	221.176	-197.745
170508n7	thoracic	Premotor	divergent	LGMG	-229.333	-108.808
170508n7	thoracic	Premotor	divergent	LGMG	318.75	163.233
170508n7	thoracic	Premotor	divergent	LGMG	323.209	189.92
170508n7	thoracic	Premotor	divergent	LGMG	284.337	77.5934
170508n7	thoracic	Premotor	divergent	LGMG	258.065	188.964
170508n7	thoracic	Premotor	divergent	LGMG	296.216	176.965
170508n7	thoracic	Premotor	divergent	LGMG	-177.099	-83.8272
170508n7	thoracic	Premotor	divergent	LGMG	257.955	170.261
170508n7	thoracic	Premotor	divergent	LGMG	-162.963	-309.791
170125n3	thoracic	Premotor	mCherry	MG	33.1551	-24.2308
170125n3	thoracic	Premotor	mCherry	MG	298.396	-228.846
170125n3	thoracic	Premotor	mCherry	MG	317.703	112.797
170125n3	thoracic	Premotor	mCherry	MG	45.933	-97.8814
170125n3	thoracic	Premotor	mCherry	MG	-69.8565	-118.269
170125n3	thoracic	Premotor	mCherry	MG	261.818	193.107
170125n3	thoracic	Premotor	mCherry	MG	66.3636	14.1544
170125n3	thoracic	Premotor	mCherry	MG	44.5455	-29.4038
170125n3	thoracic	Premotor	mCherry	MG	-55.4371	-85.4412
170125n3	thoracic	Premotor	mCherry	MG	318.182	-106.233
170125n3	thoracic	Premotor	mCherry	MG	264.545	-109.079
170125n3	thoracic	Premotor	mCherry	MG	-78.4648	-118.382
170125n3	thoracic	Premotor	mCherry	MG	191.898	187.691
170125n3	thoracic	Premotor	mCherry	MG	-79.2453	49.1228
170125n3	thoracic	Premotor	mCherry	MG	-279.245	-59.7796
170125n3	thoracic	Premotor	mCherry	MG	287.764	102.25
170125n3	thoracic	Premotor	mCherry	MG	-81.106	42.798
170125n3	thoracic	Premotor	mCherry	MG	183.122	19.3738
170125n3	thoracic	Premotor	mCherry	MG	-282.949	-71.6138
170125n3	thoracic	Premotor	mCherry	MG	339.241	-99.7455
170125n3	thoracic	Premotor	mCherry	MG	261.818	-16.1685
170125n3	thoracic	Premotor	mCherry	MG	90.3896	-37.0924
170125n3	thoracic	Premotor	mCherry	MG	-98.6425	-142.932
170125n3	thoracic	Premotor	mCherry	MG	-90.4977	-144.764
170125n3	thoracic	Premotor	mCherry	MG	-16	72.1761
170125n3	thoracic	Premotor	mCherry	MG	46.5116	45.8333
170125n3	thoracic	Premotor	mCherry	MG	-111.111	-147.316
170125n3	thoracic	Premotor	mCherry	MG	273.488	-167.257
170125n3	thoracic	Premotor	mCherry	MG	26.9327	-57.6659
170125n3	thoracic	Premotor	mCherry	MG	-283.041	-148.861
170125n3	thoracic	Premotor	mCherry	MG	280.084	-177.431
170125n3	thoracic	Premotor	mCherry	MG	48.8479	14.3
170125n3	thoracic	Premotor	mCherry	MG	-61.3811	-26.7705
170125n3	thoracic	Premotor	mCherry	MG	39.6783	-25.6098
170125n3	thoracic	Premotor	mCherry	MG	-324.891	-13.3588
170125n3	thoracic	Premotor	mCherry	MG	-216.594	-130.025
170125n3	thoracic	Premotor	mCherry	MG	380.6	125.213
170125n3	thoracic	Premotor	mCherry	MG	-259.366	-85.5164
170125n3	thoracic	Premotor	mCherry	MG	272.517	-118.114
170125n3	thoracic	Premotor	mCherry	MG	223.557	-303.102
170125n3	thoracic	Premotor	mCherry	MG	301.357	190.385
170125n3	thoracic	Premotor	mCherry	MG	254.299	-163.164
170125n3	thoracic	Premotor	mCherry	MG	-112	-258.293
170125n3	thoracic	Premotor	mCherry	MG	-98.0392	141.773
170125n3	thoracic	Premotor	mCherry	MG	270.3	24.4444
170125n3	thoracic	Premotor	mCherry	MG	-156.265	-310.714
170125n3	thoracic	Premotor	mCherry	MG	275.578	229.787
170125n3	thoracic	Premotor	mCherry	MG	-88.7781	-65.8416
170125n3	thoracic	Premotor	mCherry	MG	278.539	-39.9272
170125n3	thoracic	Premotor	mCherry	MG	-201.087	156.052
170125n3	thoracic	Premotor	mCherry	MG	-65.7277	-100.513
170125n3	thoracic	Premotor	mCherry	MG	280.335	-146.597
170125n3	thoracic	Premotor	mCherry	MG	-170.127	-38.7838
170125n3	thoracic	Premotor	mCherry	MG	-97.2152	-187.297
170125n3	thoracic	Premotor	mCherry	MG	-125.57	-193.919
170125n3	thoracic	Premotor	mCherry	MG	-200	-184.953
170125n3	thoracic	Premotor	mCherry	MG	-48.5549	-43.3486
170125n3	thoracic	Premotor	mCherry	MG	-255.491	-107.569
170125n3	thoracic	Premotor	mCherry	MG	-116.788	-26.3158
170125n3	thoracic	Premotor	mCherry	MG	-93.4307	-120.175
170125n3	thoracic	Premotor	mCherry	MG	-73.9659	-137.719
170125n3	thoracic	Premotor	mCherry	MG	-127.273	-38.7972
170125n3	thoracic	Premotor	mCherry	MG	-221.13	-99.75
170125n3	thoracic	Premotor	mCherry	MG	-66.1417	-110.437
170125n3	thoracic	Premotor	mCherry	MG	30.0518	8.42912
170125n3	thoracic	Premotor	mCherry	MG	-93.3002	-154.177
170125n3	thoracic	Premotor	mCherry	MG	355.556	-252.078
170125n3	thoracic	Premotor	mCherry	MG	276.364	-40.1146
170125n3	thoracic	Premotor	mCherry	MG	52.7273	-99.2837
170125n3	thoracic	Premotor	mCherry	MG	-66.8281	-130.57
170125n3	thoracic	Premotor	mCherry	MG	226.772	-132.344
170125n3	thoracic	Premotor	mCherry	MG	-60.7595	-130.233
170125n3	thoracic	Premotor	mCherry	MG	50.3497	21.2316
170125n3	thoracic	Premotor	mCherry	MG	114.409	-25.6545
170125n3	thoracic	Premotor	mCherry	MG	254.214	-161.607
170125n3	thoracic	Premotor	mCherry	MG	125.945	-335.731
170125n3	thoracic	Premotor	mCherry	MG	107.449	37.6258
170125n3	thoracic	Premotor	mCherry	MG	205.869	-244.652
170125n3	thoracic	Premotor	mCherry	MG	188.713	-249.876
170125n3	thoracic	Premotor	mCherry	MG	-196.02	68.6239
170125n3	thoracic	Premotor	mCherry	MG	-153.234	42.3853
170125n3	thoracic	Premotor	mCherry	MG	-238.695	-156.46
170125n3	thoracic	Premotor	mCherry	MG	-137.995	-212.532
170125n3	thoracic	Premotor	mCherry	MG	-139.348	-93.75
170125n3	thoracic	Premotor	mCherry	MG	-232.763	-88.8601
170125n3	thoracic	Premotor	mCherry	MG	-242.08	-80.2667
170125n3	thoracic	Premotor	mCherry	MG	353.465	-108.971
170125n3	thoracic	Premotor	mCherry	MG	-249.802	-124.806
170125n3	thoracic	Premotor	mCherry	MG	-266.187	-125.781
170125n3	thoracic	Premotor	mCherry	MG	-214.706	210.547
170508n7	thoracic	Premotor	mCherry	MG	293.333	107.46
170508n7	thoracic	Premotor	mCherry	MG	185.013	160.769
170508n7	thoracic	Premotor	mCherry	MG	360.563	-64.7202
170508n7	thoracic	Premotor	mCherry	MG	342.408	-29.4554
170508n7	thoracic	Premotor	mCherry	MG	-277.807	-147.462
170508n7	thoracic	Premotor	mCherry	MG	305.319	-157.18
170508n7	thoracic	Premotor	mCherry	MG	232.869	84.3137
170508n7	thoracic	Premotor	mCherry	MG	331.892	-177.734
170508n7	thoracic	Premotor	mCherry	MG	-164.524	-31.4815
170508n7	thoracic	Premotor	mCherry	MG	-158.794	-81.7585
170508n7	thoracic	Premotor	mCherry	MG	-131.969	-210.897
170508n7	thoracic	Premotor	mCherry	MG	-188.235	-26.9231
170508n7	thoracic	Premotor	mCherry	MG	244.56	-35.5198
170508n7	thoracic	Premotor	mCherry	MG	359.783	-49
170508n7	thoracic	Premotor	mCherry	MG	-192	-145.558
170508n7	thoracic	Premotor	mCherry	MG	286.162	-129.257
170508n7	thoracic	Premotor	mCherry	MG	223.913	172.253
170508n7	thoracic	Premotor	mCherry	MG	-174.444	-134.543
170508n7	thoracic	Premotor	mCherry	MG	-216.043	-98.7903
170508n7	thoracic	Premotor	mCherry	MG	-162.398	-150.783
170508n7	thoracic	Premotor	mCherry	MG	313.295	-97.5871
170508n7	thoracic	Premotor	mCherry	MG	249.143	-29.2453
170508n7	thoracic	Premotor	mCherry	MG	-224.211	-15.3005
170508n7	thoracic	Premotor	mCherry	MG	108.262	-4.4757
170508n7	thoracic	Premotor	mCherry	MG	-183.476	-175.978
170508n7	thoracic	Premotor	mCherry	MG	312.849	-50.271
170508n7	thoracic	Premotor	mCherry	MG	-104.918	-198.214
170508n7	thoracic	Premotor	mCherry	MG	293.878	137.5
170508n7	thoracic	Premotor	mCherry	MG	275.132	127.583
170508n7	thoracic	Premotor	mCherry	MG	-152.909	-230.89
170508n7	thoracic	Premotor	mCherry	MG	36.25	-167.919
170508n7	thoracic	Premotor	mCherry	MG	-181.921	-14.2132
170508n7	thoracic	Premotor	mCherry	MG	-192.09	-29.3147
170508n7	thoracic	Premotor	mCherry	MG	322.006	80.3605
170508n7	thoracic	Premotor	mCherry	MG	14.7309	-95.2599
170508n7	thoracic	Premotor	mCherry	MG	83.3803	-112.873
170508n7	thoracic	Premotor	mCherry	MG	59.3023	-126.531
170508n7	thoracic	Premotor	mCherry	MG	-175.758	-124.682
170508n7	thoracic	Premotor	mCherry	MG	-106.667	-70.1799
170508n7	thoracic	Premotor	mCherry	MG	242.075	-262.017
170508n7	thoracic	Premotor	mCherry	MG	239.286	132.24
170508n7	thoracic	Premotor	mCherry	MG	-95.8678	-123.582
170508n7	thoracic	Premotor	mCherry	MG	304.607	171.025
170508n7	thoracic	Premotor	mCherry	MG	-108.808	-2.61845
170508n7	thoracic	Premotor	mCherry	MG	328.463	-27.6567
170508n7	thoracic	Premotor	mCherry	MG	268.203	88
170125n7	thoracic	Premotor	eGFP	PL	-15.5039	52.8431
170125n7	thoracic	Premotor	eGFP	PL	226.733	173.897
170125n7	thoracic	Premotor	eGFP	PL	266.337	14.1544
170125n7	thoracic	Premotor	eGFP	PL	108.642	-183.495
170125n7	thoracic	Premotor	eGFP	PL	246.091	57.4336
170125n7	thoracic	Premotor	eGFP	PL	251.852	41.8584
170125n7	thoracic	Premotor	eGFP	PL	169.33	-107.414
170125n7	thoracic	Premotor	eGFP	PL	305.607	144.792
170125n7	thoracic	Premotor	eGFP	PL	363.918	-19.112
170125n7	thoracic	Premotor	eGFP	PL	209.524	158.569
170125n7	thoracic	Premotor	eGFP	PL	280.272	197.379
170125n7	thoracic	Premotor	eGFP	PL	-67.8414	236.992
170125n7	thoracic	Premotor	eGFP	PL	271.392	149.065
170125n7	thoracic	Premotor	eGFP	PL	217.632	-68.7117
170125n7	thoracic	Premotor	eGFP	PL	267.003	148.649
170125n7	thoracic	Premotor	eGFP	PL	-280.597	-153.175
170125n7	thoracic	Premotor	eGFP	PL	43.6526	-74.5562
170125n7	thoracic	Premotor	eGFP	PL	334.967	-221.598
170125n7	thoracic	Premotor	eGFP	PL	280.519	-58.5075
170125n7	thoracic	Premotor	eGFP	PL	168.618	114.494
170125n7	thoracic	Premotor	eGFP	PL	332.88	-61.8902
170125n7	thoracic	Premotor	eGFP	PL	346.919	201.004
170125n7	thoracic	Premotor	eGFP	PL	-153.317	-89.3777
170125n7	thoracic	Premotor	eGFP	PL	-286.525	-112.472
170125n7	thoracic	Premotor	eGFP	PL	-142.787	-10.2477
170125n7	thoracic	Premotor	eGFP	PL	261.207	-118.942
170125n7	thoracic	Premotor	eGFP	PL	228.942	-116.667
170125n7	thoracic	Premotor	eGFP	PL	310.805	-56.0393
170125n7	thoracic	Premotor	eGFP	PL	312.644	-29.4944
170125n7	thoracic	Premotor	eGFP	PL	294.468	-25.5848
170125n7	thoracic	Premotor	eGFP	PL	306.383	-54.2398
170125n7	thoracic	Premotor	eGFP	PL	-296.833	180.417
170125n7	thoracic	Premotor	eGFP	PL	388.913	203.981
170125n7	thoracic	Premotor	eGFP	PL	221.258	144.207
170125n7	thoracic	Premotor	eGFP	PL	-189.522	-131.37
170125n7	thoracic	Premotor	eGFP	PL	289.72	184.444
170125n7	thoracic	Premotor	eGFP	PL	-235.872	-89.5141
170125n7	thoracic	Premotor	eGFP	PL	-183.896	-78.3019
170125n7	thoracic	Premotor	eGFP	PL	-180.779	-217.925
170125n7	thoracic	Premotor	eGFP	PL	-140.566	-221.974
170125n7	thoracic	Premotor	eGFP	PL	-112.621	-102.995
170125n7	thoracic	Premotor	eGFP	PL	-228.571	-97.8261
170125n7	thoracic	Premotor	eGFP	PL	310.359	230.405
170125n7	thoracic	Premotor	eGFP	PL	349.776	212.205
170125n7	thoracic	Premotor	eGFP	PL	332.939	-12.5691
170214n8	thoracic	Premotor	eGFP	PL	40.6619	38
170214n8	thoracic	Premotor	eGFP	PL	56.8365	19.9597
170214n8	thoracic	Premotor	eGFP	PL	325.275	-138.158
170214n8	thoracic	Premotor	eGFP	PL	176.923	157.843
170214n8	thoracic	Premotor	eGFP	PL	147.804	-327.454
170214n8	thoracic	Premotor	eGFP	PL	283.204	312.974
170214n8	thoracic	Premotor	eGFP	PL	74.8268	16.1765
170214n8	thoracic	Premotor	eGFP	PL	323.711	229.519
170214n8	thoracic	Premotor	eGFP	PL	-21.5054	28.8427
170214n8	thoracic	Premotor	eGFP	PL	189.731	116.327
170214n8	thoracic	Premotor	eGFP	PL	267.971	83.8652
170214n8	thoracic	Premotor	eGFP	PL	146.313	276.087
170214n8	thoracic	Premotor	eGFP	PL	324.706	-49.7268
170214n8	thoracic	Premotor	eGFP	PL	263.501	156.591
170214n8	thoracic	Premotor	eGFP	PL	41.7582	-11.7571
170214n8	thoracic	Premotor	eGFP	PL	38.4342	15.0526
170214n8	thoracic	Premotor	eGFP	PL	326.28	205.799
170214n8	thoracic	Premotor	eGFP	PL	236.299	264.541
170214n8	thoracic	Premotor	eGFP	PL	28.7879	27.2043
170214n8	thoracic	Premotor	eGFP	PL	-236.923	-99.2337
170214n8	thoracic	Premotor	eGFP	PL	294.424	55
170214n8	thoracic	Premotor	eGFP	PL	31.3167	-86.5979
170214n8	thoracic	Premotor	eGFP	PL	315.328	147.821
170214n8	thoracic	Premotor	eGFP	PL	293.902	156.562
170214n8	thoracic	Premotor	eGFP	PL	323.881	207.588
170214n8	thoracic	Premotor	eGFP	PL	397.306	192.551
170214n8	thoracic	Premotor	eGFP	PL	331.518	140.854
170214n8	thoracic	Premotor	eGFP	PL	306.977	172.409
170214n8	thoracic	Premotor	eGFP	PL	327.941	-35
170214n8	thoracic	Premotor	eGFP	PL	162.857	-285.366
170214n8	thoracic	Premotor	eGFP	PL	-369.048	260.526
170214n8	thoracic	Premotor	eGFP	PL	220.183	-83.3333
170214n8	thoracic	Premotor	eGFP	PL	13.7072	48.4581
170214n8	thoracic	Premotor	eGFP	PL	240.741	-214.387
170214n8	thoracic	Premotor	eGFP	PL	206.481	43.2712
170214n8	thoracic	Premotor	eGFP	PL	332.152	225.347
170214n8	thoracic	Premotor	eGFP	PL	-156.364	-173.323
170125n7	thoracic	Premotor	mCherry	TA	158.025	-174.434
170125n7	thoracic	Premotor	mCherry	TA	342.268	208.108
170125n7	thoracic	Premotor	mCherry	TA	222.319	53.7594
170125n7	thoracic	Premotor	mCherry	TA	-231.034	-268.282
170125n7	thoracic	Premotor	mCherry	TA	300.465	194.299
170125n7	thoracic	Premotor	mCherry	TA	-191.537	-52.1111
170125n7	thoracic	Premotor	mCherry	TA	-196.098	-112.5
170125n7	thoracic	Premotor	mCherry	TA	-66.3551	-100
170125n7	thoracic	Premotor	mCherry	TA	323.276	-63.3705
170125n7	thoracic	Premotor	mCherry	TA	44.3497	-3.37621
170125n7	thoracic	Premotor	mCherry	TA	-172.973	-270.61
170125n7	thoracic	Premotor	mCherry	TA	-21.7984	-40
170125n7	thoracic	Premotor	mCherry	TA	184.483	252.733
170125n7	thoracic	Premotor	mCherry	TA	-155.869	-55.409
170125n7	thoracic	Premotor	mCherry	TA	333.8	-31.0284
170125n7	thoracic	Premotor	mCherry	TA	196.825	-35.8362
170125n7	thoracic	Premotor	mCherry	TA	300.223	104.762
170125n7	thoracic	Premotor	mCherry	TA	-194.595	-145.908
170125n7	thoracic	Premotor	mCherry	TA	-104.977	-250.651
170214n8	thoracic	Premotor	mCherry	TA	-47.0588	-118.125
170214n8	thoracic	Premotor	mCherry	TA	341.371	-26.6404
170214n8	thoracic	Premotor	mCherry	TA	-155.882	89.2623
170214n8	thoracic	Premotor	mCherry	TA	199.464	32.1573
170214n8	thoracic	Premotor	mCherry	TA	241.287	150.806
170214n8	thoracic	Premotor	mCherry	TA	162.637	74.5098
170214n8	thoracic	Premotor	mCherry	TA	310.989	76.4706
170214n8	thoracic	Premotor	mCherry	TA	-139.896	-158.889
170214n8	thoracic	Premotor	mCherry	TA	185.013	-310.276
170214n8	thoracic	Premotor	mCherry	TA	174.677	151.897
170214n8	thoracic	Premotor	mCherry	TA	-241.86	-71.7573
170214n8	thoracic	Premotor	mCherry	TA	7.80488	-54.0123
170214n8	thoracic	Premotor	mCherry	TA	-201.481	107.827
170214n8	thoracic	Premotor	mCherry	TA	225.366	121.157
170214n8	thoracic	Premotor	mCherry	TA	-210.37	226.52
170214n8	thoracic	Premotor	mCherry	TA	-282.828	-27.551
170214n8	thoracic	Premotor	mCherry	TA	-251.515	-11.2245
170214n8	thoracic	Premotor	mCherry	TA	237.413	168.426
170214n8	thoracic	Premotor	mCherry	TA	-266.667	-71.7949
170214n8	thoracic	Premotor	mCherry	TA	357.843	48.3621
170214n8	thoracic	Premotor	mCherry	TA	332.308	-151.632
170214n8	thoracic	Premotor	mCherry	TA	57.732	23.2692
170214n8	thoracic	Premotor	mCherry	TA	265.979	142.788
170214n8	thoracic	Premotor	mCherry	TA	71.7325	16.5725
170214n8	thoracic	Premotor	mCherry	TA	250.562	28.0851
170214n8	thoracic	Premotor	mCherry	TA	341.547	236.015
170214n8	thoracic	Premotor	mCherry	TA	-148.607	286.438
170214n8	thoracic	Premotor	mCherry	TA	-149.865	-278.483
170214n8	thoracic	Premotor	mCherry	TA	310.024	196.011
170214n8	thoracic	Premotor	mCherry	TA	-224.561	-32.1429
170214n8	thoracic	Premotor	mCherry	TA	337.463	17.3913
170214n8	thoracic	Premotor	mCherry	TA	305.605	107.609
170214n8	thoracic	Premotor	mCherry	TA	-92.8367	-143.617
170214n8	thoracic	Premotor	mCherry	TA	132.872	117.938
170214n8	thoracic	Premotor	mCherry	TA	-197.834	-51.5789
170214n8	thoracic	Premotor	mCherry	TA	-95.6522	-159.288
170214n8	thoracic	Premotor	mCherry	TA	-193.789	-65.0155
170214n8	thoracic	Premotor	mCherry	TA	321.708	96.1053
170214n8	thoracic	Premotor	mCherry	TA	-159.17	164.409
170214n8	thoracic	Premotor	mCherry	TA	-90.5923	-120.863
170214n8	thoracic	Premotor	mCherry	TA	-98.9547	-15.1079
170214n8	thoracic	Premotor	mCherry	TA	-146.866	-154.18
170214n8	thoracic	Premotor	mCherry	TA	-208.955	-126.045
170214n8	thoracic	Premotor	mCherry	TA	333.813	50.4167
170214n8	thoracic	Premotor	mCherry	TA	167.606	-51.0949
170214n8	thoracic	Premotor	mCherry	TA	-22.6148	-102.867
170214n8	thoracic	Premotor	mCherry	TA	17.8082	10.4211
170214n8	thoracic	Premotor	mCherry	TA	335.836	-123.39
170214n8	thoracic	Premotor	mCherry	TA	285.324	135.15
170214n8	thoracic	Premotor	mCherry	TA	234.944	-78.2197
170214n8	thoracic	Premotor	mCherry	TA	277.273	130.108
170214n8	thoracic	Premotor	mCherry	TA	165.854	-76.5993
170214n8	thoracic	Premotor	mCherry	TA	-215.73	-1.36187
170214n8	thoracic	Premotor	mCherry	TA	-81.6667	-143.726
170214n8	thoracic	Premotor	mCherry	TA	408.759	251.695
170214n8	thoracic	Premotor	mCherry	TA	-110.701	12.6437
170214n8	thoracic	Premotor	mCherry	TA	-228.975	-118.153
170214n8	thoracic	Premotor	mCherry	TA	-266.094	-144.737
170214n8	thoracic	Premotor	mCherry	TA	315.152	-50.7634
170214n8	thoracic	Premotor	mCherry	TA	-52.6316	-133.951
170214n8	thoracic	Premotor	mCherry	TA	-184.615	-30.0373
170214n8	thoracic	Premotor	mCherry	TA	-206.25	-284.457
170214n8	thoracic	Premotor	mCherry	TA	92.4188	5.14019
170214n8	thoracic	Premotor	mCherry	TA	247.619	-232.443
170214n8	thoracic	Premotor	mCherry	TA	256	46.6981
170214n8	thoracic	Premotor	mCherry	TA	7.27273	78.3908
170214n8	thoracic	Premotor	mCherry	TA	318.491	3.85514
170214n8	thoracic	Premotor	mCherry	TA	230.303	85.9375
170214n8	thoracic	Premotor	mCherry	TA	270.4	66.443
170214n8	thoracic	Premotor	mCherry	TA	280.727	172.26
170214n8	thoracic	Premotor	mCherry	TA	-127.719	-134.124
170214n8	thoracic	Premotor	mCherry	TA	197.143	-245.122
170214n8	thoracic	Premotor	mCherry	TA	312.121	153.953
170214n8	thoracic	Premotor	mCherry	TA	-76.4045	-84.1924
170214n8	thoracic	Premotor	mCherry	TA	-64.2336	6.20767
170214n8	thoracic	Premotor	mCherry	TA	47.8632	18.0131
170214n8	thoracic	Premotor	mCherry	TA	248.101	-206.441
170214n8	thoracic	Premotor	mCherry	TA	-67.6385	-124.08
170214n8	thoracic	Premotor	mCherry	TA	-242.105	218.402
170214n8	thoracic	Premotor	mCherry	TA	53.4031	2.51716
170214n8	thoracic	Premotor	mCherry	TA	6.21762	-131.111
170125n7	thoracic	Premotor	divergent	TAPL	-182.938	-89.9083
170125n7	thoracic	Premotor	divergent	TAPL	-239.815	-97.4478
170125n7	thoracic	Premotor	divergent	TAPL	-181.53	-91.6309
170125n7	thoracic	Premotor	divergent	TAPL	-192.07	-133.92
170125n7	thoracic	Premotor	divergent	TAPL	309.133	243.353
170125n7	thoracic	Premotor	divergent	TAPL	-251.054	-138.197
170125n7	thoracic	Premotor	divergent	TAPL	184.906	84.9421
170125n7	thoracic	Premotor	divergent	TAPL	-206.089	-75.6322
170125n7	thoracic	Premotor	divergent	TAPL	-238.631	-120.608
170125n7	thoracic	Premotor	divergent	TAPL	320.69	202.935
170125n7	thoracic	Premotor	divergent	TAPL	315.974	187.045
170125n7	thoracic	Premotor	divergent	TAPL	280.851	181.594
170125n7	thoracic	Premotor	divergent	TAPL	37.3757	34.7826
170125n7	thoracic	Premotor	divergent	TAPL	305.499	186.327
170125n7	thoracic	Premotor	divergent	TAPL	343.875	169.714
170125n7	thoracic	Premotor	divergent	TAPL	-227.358	-82.8947
170125n7	thoracic	Premotor	divergent	TAPL	316.279	199.614
170125n7	thoracic	Premotor	divergent	TAPL	318.027	206.674
170125n7	thoracic	Premotor	divergent	TAPL	340.562	214.354
170125n7	thoracic	Premotor	divergent	TAPL	-259.286	-144.118
170214n8	thoracic	Premotor	divergent	TAPL	375.13	-51.3889
170214n8	thoracic	Premotor	divergent	TAPL	344.186	79.2868
170214n8	thoracic	Premotor	divergent	TAPL	325.606	163.153
170214n8	thoracic	Premotor	divergent	TAPL	391.795	-38.4273
170214n8	thoracic	Premotor	divergent	TAPL	291.793	217.514
170214n8	thoracic	Premotor	divergent	TAPL	373.034	-72.9682
170214n8	thoracic	Premotor	divergent	TAPL	384.57	202.021
170214n8	thoracic	Premotor	divergent	TAPL	413.187	122.635
170214n8	thoracic	Premotor	divergent	TAPL	301.779	167.338
170214n8	thoracic	Premotor	divergent	TAPL	286.64	53.5019
170214n8	thoracic	Premotor	divergent	TAPL	375.719	205.952
170214n8	thoracic	Premotor	divergent	TAPL	294.203	147.685
170214n8	thoracic	Premotor	divergent	TAPL	377.922	223.406
170214n8	thoracic	Premotor	divergent	TAPL	353.846	204.977
170214n8	thoracic	Premotor	divergent	TAPL	323.077	170.127
170214n8	thoracic	Premotor	divergent	TAPL	299.435	182.898
170214n8	thoracic	Premotor	divergent	TAPL	277.966	182.898
170214n8	thoracic	Premotor	divergent	TAPL	267.662	206.25
170214n8	thoracic	Premotor	mCherry	TA	206.452	208.522
170214n8	thoracic	Premotor	mCherry	TA	243.678	250.082
