# Supplementary material for: Proximal and distal spinal neurons innervating multiple synergist and antagonist motor pools
Source: eLife. 2021 Nov 2;10:e70858. doi: 10.7554/eLife.70858 (PMC8631798; doi:10.7554/eLife.70858)
Supplement: Figure 3—figure supplement 4—source data 1. [file elife-70858-fig3-figsupp4-data1.xlsx]

## Sheet: Figure 3-figure supplement 4
Sample	Part of Spinal Cord	Identity	labelling	Muscles	Medio_Lateral	Dorso_Ventral	Rostro-caudal
170427n2	Cervical	Premotor	divergent	LGTA	-226.325	-269.794	-2086.21
170427n2	Cervical	Premotor	divergent	LGTA	-195.008	-125.378	-1810.34
170427n2	Cervical	Premotor	divergent	LGTA	-220.489	-244.488	-741.379
170427n3	Cervical	Premotor	divergent	LGTA	-284.3	-285.044	-1018.52
170427n3	Cervical	Premotor	divergent	LGTA	-205.514	-213.687	-61.7284
170503n6	Cervical	Premotor	divergent	LGTA	351.012	232.143	-2080.65
170125n3	Cervical	Premotor	divergent	LGMG	-292.623	-277.182	-2231.54
170125n3	Cervical	Premotor	divergent	LGMG	-197.013	-253.616	-1828.86
170125n3	Cervical	Premotor	divergent	LGMG	-162.752	-247.555	788.591
170125n3	Cervical	Premotor	divergent	LGMG	278.824	-129.174	1761.74
170508n7	Cervical	Premotor	divergent	LGMG	-260.372	-293.519	-2320.14
170508n7	Cervical	Premotor	divergent	LGMG	-290.885	-233.636	-2068.35
170508n7	Cervical	Premotor	divergent	LGMG	-311.741	-304.717	-1384.89
170508n7	Cervical	Premotor	divergent	LGMG	-272.981	-316.269	-1241.01
170508n7	Cervical	Premotor	divergent	LGMG	-270.435	-317.935	-881.295
170125n3	Cervical	Premotor	eGFP	LG	-248.431	-244.819	-2500
170125n3	Cervical	Premotor	eGFP	LG	-279.511	-309.507	-1661.07
170125n3	Cervical	Premotor	eGFP	LG	307.317	-282.024	151.007
170503n6	Cervical	Premotor	divergent	LGTA	-159.227	-221.294	-1661.29
170503n6	Cervical	Premotor	divergent	LGTA	-186.601	-271.382	-1467.74
170503n6	Cervical	Premotor	divergent	LGTA	-208.47	-345.574	-1403.23
170503n6	Cervical	Premotor	divergent	LGTA	258.411	-270.487	-1370.97
170503n6	Cervical	Premotor	divergent	LGTA	-129.597	-202.268	-1080.65
170503n6	Cervical	Premotor	divergent	LGTA	-224.931	-227.848	-951.613
170503n6	Cervical	Premotor	divergent	LGTA	243.433	-264.754	-919.355
170503n6	Cervical	Premotor	divergent	LGTA	-238.462	-231.981	-80.6452
170503n6	Cervical	Premotor	divergent	LGTA	198.134	-205.684	209.677
170503n6	Cervical	Premotor	divergent	LGTA	-179.091	-239.547	403.226
170503n6	Cervical	Premotor	divergent	LGTA	419.251	-212.247	1338.71
170503n6	Cervical	Premotor	divergent	LGTA	-301.389	-132.848	1661.29
170503n6	Cervical	Premotor	divergent	LGTA	-311.5	-139.831	1983.87
170427n2	Cervical	Premotor	eGFP	LG	258.872	-368.504	-1086.21
170427n2	Cervical	Premotor	eGFP	LG	405.321	-24.0642	-120.69
170427n3	Cervical	Premotor	eGFP	LG	-296.115	-221.707	-2314.81
170503n6	Cervical	Premotor	eGFP	LG	217.207	-166.587	-2338.71
170503n6	Cervical	Premotor	eGFP	LG	-222.627	-223.256	-1854.84
170503n6	Cervical	Premotor	eGFP	LG	-236.938	-371.484	-1758.06
170503n6	Cervical	Premotor	eGFP	LG	-129.775	-171.094	-1758.06
170503n6	Cervical	Premotor	eGFP	LG	-180.432	-87.0166	-48.3871
170503n6	Cervical	Premotor	eGFP	LG	-353.714	-221.429	-16.129
170503n6	Cervical	Premotor	eGFP	LG	374.007	-237.913	1532.26
170503n6	Cervical	Premotor	eGFP	LG	-342.929	-156.273	1822.58
170427n2	Cervical	Premotor	mCherry	TA	-311.246	-170.616	879.31
170427n3	Cervical	Premotor	mCherry	TA	180.155	-262.074	-555.556
170427n3	Cervical	Premotor	mCherry	TA	435.753	-220.588	1481.48
170503n6	Cervical	Premotor	mCherry	TA	-277.76	-151.432	-2500
170503n6	Cervical	Premotor	mCherry	TA	-184.831	-268.359	-1758.06
170503n6	Cervical	Premotor	mCherry	TA	-289.088	-248.153	-145.161
170503n6	Cervical	Premotor	mCherry	TA	242.832	-340.223	1112.9
170125n7	Cervical	Premotor	divergent	TAPL	-168.396	-261.29	-1925.68
170125n7	Cervical	Premotor	divergent	TAPL	289.754	-255.035	-1858.11
170125n7	Cervical	Premotor	divergent	TAPL	-233.879	-263.647	-1554.05
170125n7	Cervical	Premotor	divergent	TAPL	-341.6	-295.924	-1250
170125n7	Cervical	Premotor	divergent	TAPL	-255.914	-239.062	-1081.08
170125n7	Cervical	Premotor	divergent	TAPL	-297.548	-221.294	-472.973
170125n7	Cervical	Premotor	divergent	TAPL	-151.511	-225	304.054
170214n8	Cervical	Premotor	divergent	TAPL	-238.851	-236.712	-2462.69
170214n8	Cervical	Premotor	divergent	TAPL	-265.714	-220.645	-2425.37
170214n8	Cervical	Premotor	divergent	TAPL	-295.733	-206.135	1679.1
170125n7	Cervical	Premotor	eGFP	PL	474.422	232.473	-2297.3
170125n7	Cervical	Premotor	eGFP	PL	-54.3597	-109.177	-2263.51
170125n7	Cervical	Premotor	eGFP	PL	-198.44	-157.394	-2027.03
170125n7	Cervical	Premotor	eGFP	PL	-392.102	-224.442	-540.541
170125n7	Cervical	Premotor	eGFP	PL	-328.528	-136.722	1351.35
170125n7	Cervical	Premotor	eGFP	PL	-316.864	-121.084	1385.14
170125n7	Cervical	Premotor	eGFP	PL	-294.077	-194.135	1452.7
170125n7	Cervical	Premotor	mCherry	TA	258.543	-185.473	-1013.51
170214n8	Cervical	Premotor	mCherry	TA	-225.546	-210.128	-1156.72
170125n7	Cervical	Premotor	mCherry	TA	-342.176	-156.901	-2364.86
170125n3	Cervical	Premotor	eGFP	LG	-391.525	-133.516	2265.1
170508n7	Cervical	Premotor	eGFP	LG	-239.36	-224.085	-2248.2
170508n7	Cervical	Premotor	eGFP	LG	-288.438	-417.073	-2248.2
170508n7	Cervical	Premotor	eGFP	LG	130.463	-164.677	-1636.69
170508n7	Cervical	Premotor	eGFP	LG	164.005	-248.473	-593.525
170508n7	Cervical	Premotor	eGFP	LG	-283.46	-177.927	1420.86
170508n7	Cervical	Premotor	eGFP	LG	420.263	-208.389	1816.55
170508n7	Cervical	Premotor	eGFP	LG	-225.424	-152.234	1924.46
170125n3	Cervical	Premotor	mCherry	MG	-259.834	-141.615	-1996.64
170125n3	Cervical	Premotor	mCherry	MG	-233.657	-150	-1996.64
170125n3	Cervical	Premotor	mCherry	MG	-292.985	-229.72	-1728.19
170125n3	Cervical	Premotor	mCherry	MG	-152.141	-274.127	-1224.83
170508n7	Cervical	Premotor	mCherry	MG	-200.735	-263.972	-701.439
170508n7	Cervical	Premotor	mCherry	MG	346.569	-277.875	773.381
170508n7	Cervical	Premotor	mCherry	MG	-363.604	-208.735	845.324
170508n7	Cervical	Premotor	mCherry	MG	-243.704	-133.526	1816.55
170508n7	Cervical	Premotor	mCherry	MG	400.503	-267.946	1960.43
170508n7	Cervical	Premotor	mCherry	MG	299.811	189.06	2104.32
170508n7	Cervical	Premotor	mCherry	MG	434.984	94.3137	2356.12
170125n7	Cervical	Premotor	mCherry	TA	-286.817	-293.478	-1520.27
170125n7	Cervical	Premotor	mCherry	TA	-255.012	-283.649	-1351.35
170125n7	Cervical	Premotor	mCherry	TA	-345.478	-343.596	-1182.43
170125n7	Cervical	Premotor	mCherry	TA	-143.286	-122.824	641.892
