# Supplementary material for: Proximal and distal spinal neurons innervating multiple synergist and antagonist motor pools
Source: eLife. 2021 Nov 2;10:e70858. doi: 10.7554/eLife.70858 (PMC8631798; doi:10.7554/eLife.70858)
Supplement: Figure 3—source data 1. [file elife-70858-fig3-data1.xlsx]

## Sheet: Figure 3B-G
Sample	Part of Spinal Cord	Identity	labelling	Muscles	Medio_Lateral	Dorso_Ventral
170427n2	Cervical	Premotor	divergent	LGTA	-226.325	-269.794
170427n2	Cervical	Premotor	divergent	LGTA	-195.008	-125.378
170427n2	Cervical	Premotor	divergent	LGTA	-220.489	-244.488
170427n3	Cervical	Premotor	divergent	LGTA	-284.3	-285.044
170427n3	Cervical	Premotor	divergent	LGTA	-205.514	-213.687
170503n6	Cervical	Premotor	divergent	LGTA	351.012	232.143
170125n3	Cervical	Premotor	divergent	LGMG	-292.623	-277.182
170125n3	Cervical	Premotor	divergent	LGMG	-197.013	-253.616
170125n3	Cervical	Premotor	divergent	LGMG	-162.752	-247.555
170125n3	Cervical	Premotor	divergent	LGMG	278.824	-129.174
170508n7	Cervical	Premotor	divergent	LGMG	-260.372	-293.519
170508n7	Cervical	Premotor	divergent	LGMG	-290.885	-233.636
170508n7	Cervical	Premotor	divergent	LGMG	-311.741	-304.717
170508n7	Cervical	Premotor	divergent	LGMG	-272.981	-316.269
170508n7	Cervical	Premotor	divergent	LGMG	-270.435	-317.935
170125n3	Cervical	Premotor	eGFP	LG	-248.431	-244.819
170125n3	Cervical	Premotor	eGFP	LG	-279.511	-309.507
170125n3	Cervical	Premotor	eGFP	LG	307.317	-282.024
170503n6	Cervical	Premotor	divergent	LGTA	-159.227	-221.294
170503n6	Cervical	Premotor	divergent	LGTA	-186.601	-271.382
170503n6	Cervical	Premotor	divergent	LGTA	-208.47	-345.574
170503n6	Cervical	Premotor	divergent	LGTA	258.411	-270.487
170503n6	Cervical	Premotor	divergent	LGTA	-129.597	-202.268
170503n6	Cervical	Premotor	divergent	LGTA	-224.931	-227.848
170503n6	Cervical	Premotor	divergent	LGTA	243.433	-264.754
170503n6	Cervical	Premotor	divergent	LGTA	-238.462	-231.981
170503n6	Cervical	Premotor	divergent	LGTA	198.134	-205.684
170503n6	Cervical	Premotor	divergent	LGTA	-179.091	-239.547
170503n6	Cervical	Premotor	divergent	LGTA	419.251	-212.247
170503n6	Cervical	Premotor	divergent	LGTA	-301.389	-132.848
170503n6	Cervical	Premotor	divergent	LGTA	-311.5	-139.831
170427n2	Cervical	Premotor	eGFP	LG	258.872	-368.504
170427n2	Cervical	Premotor	eGFP	LG	405.321	-24.0642
170427n3	Cervical	Premotor	eGFP	LG	-296.115	-221.707
170503n6	Cervical	Premotor	eGFP	LG	217.207	-166.587
170503n6	Cervical	Premotor	eGFP	LG	-222.627	-223.256
170503n6	Cervical	Premotor	eGFP	LG	-236.938	-371.484
170503n6	Cervical	Premotor	eGFP	LG	-129.775	-171.094
170503n6	Cervical	Premotor	eGFP	LG	-180.432	-87.0166
170503n6	Cervical	Premotor	eGFP	LG	-353.714	-221.429
170503n6	Cervical	Premotor	eGFP	LG	374.007	-237.913
170503n6	Cervical	Premotor	eGFP	LG	-342.929	-156.273
170427n2	Cervical	Premotor	mCherry	TA	-311.246	-170.616
170427n3	Cervical	Premotor	mCherry	TA	180.155	-262.074
170427n3	Cervical	Premotor	mCherry	TA	435.753	-220.588
170503n6	Cervical	Premotor	mCherry	TA	-277.76	-151.432
170503n6	Cervical	Premotor	mCherry	TA	-184.831	-268.359
170503n6	Cervical	Premotor	mCherry	TA	-289.088	-248.153
170503n6	Cervical	Premotor	mCherry	TA	242.832	-340.223
170125n7	Cervical	Premotor	divergent	TAPL	-168.396	-261.29
170125n7	Cervical	Premotor	divergent	TAPL	289.754	-255.035
170125n7	Cervical	Premotor	divergent	TAPL	-233.879	-263.647
170125n7	Cervical	Premotor	divergent	TAPL	-341.6	-295.924
170125n7	Cervical	Premotor	divergent	TAPL	-255.914	-239.062
170125n7	Cervical	Premotor	divergent	TAPL	-297.548	-221.294
170125n7	Cervical	Premotor	divergent	TAPL	-151.511	-225
170214n8	Cervical	Premotor	divergent	TAPL	-238.851	-236.712
170214n8	Cervical	Premotor	divergent	TAPL	-265.714	-220.645
170214n8	Cervical	Premotor	divergent	TAPL	-295.733	-206.135
170125n7	Cervical	Premotor	eGFP	PL	474.422	232.473
170125n7	Cervical	Premotor	eGFP	PL	-54.3597	-109.177
170125n7	Cervical	Premotor	eGFP	PL	-198.44	-157.394
170125n7	Cervical	Premotor	eGFP	PL	-392.102	-224.442
170125n7	Cervical	Premotor	eGFP	PL	-328.528	-136.722
170125n7	Cervical	Premotor	eGFP	PL	-316.864	-121.084
170125n7	Cervical	Premotor	eGFP	PL	-294.077	-194.135
170125n7	Cervical	Premotor	mCherry	TA	258.543	-185.473
170214n8	Cervical	Premotor	mCherry	TA	-225.546	-210.128
170125n7	Cervical	Premotor	mCherry	TA	-342.176	-156.901
170125n3	Cervical	Premotor	eGFP	LG	-391.525	-133.516
170508n7	Cervical	Premotor	eGFP	LG	-239.36	-224.085
170508n7	Cervical	Premotor	eGFP	LG	-288.438	-417.073
170508n7	Cervical	Premotor	eGFP	LG	130.463	-164.677
170508n7	Cervical	Premotor	eGFP	LG	164.005	-248.473
170508n7	Cervical	Premotor	eGFP	LG	-283.46	-177.927
170508n7	Cervical	Premotor	eGFP	LG	420.263	-208.389
170508n7	Cervical	Premotor	eGFP	LG	-225.424	-152.234
170125n3	Cervical	Premotor	mCherry	MG	-259.834	-141.615
170125n3	Cervical	Premotor	mCherry	MG	-233.657	-150
170125n3	Cervical	Premotor	mCherry	MG	-292.985	-229.72
170125n3	Cervical	Premotor	mCherry	MG	-152.141	-274.127
170508n7	Cervical	Premotor	mCherry	MG	-200.735	-263.972
170508n7	Cervical	Premotor	mCherry	MG	346.569	-277.875
170508n7	Cervical	Premotor	mCherry	MG	-363.604	-208.735
170508n7	Cervical	Premotor	mCherry	MG	-243.704	-133.526
170508n7	Cervical	Premotor	mCherry	MG	400.503	-267.946
170508n7	Cervical	Premotor	mCherry	MG	299.811	189.06
170508n7	Cervical	Premotor	mCherry	MG	434.984	94.3137
170125n7	Cervical	Premotor	mCherry	TA	-286.817	-293.478
170125n7	Cervical	Premotor	mCherry	TA	-255.012	-283.649
170125n7	Cervical	Premotor	mCherry	TA	-345.478	-343.596
170125n7	Cervical	Premotor	mCherry	TA	-143.286	-122.824

## Sheet: Figure 3H
Divergent neuron cross-sectional area (𝜇m)	Cervical	Thoracic	Lumbar
	636	596	175
	906	421	368
	661	418	414
	899	452	301
	402	108	200
	621	284	278
	808	271	423
	891	481	300
	916	253	337
	1236	685	245
	1150	383	237
	1014	293	326
	937	673	397
	744	398	338
	410	361	485
	756	532	264
	547	343	332
	481	201	337
	1141	412	184
	847	287	350
	618	235	181
	675	350	250
	866	365	452
	842	426	451
	282	303	308
	720	400	339
	776	550	223
	927	386	201
	884	345	200
	655	391	226
	1007	293	166
	968	484	320
	886	192	267
	948	224	287
	986	708	207
	557	266	164
	378	248	409
	416	257	321
		205	336
		263	390
		275	327
		317	432
		339	404
		344	393
		391	300
		400	290
		408	175
		425	376
		431	533
		451	200
		451	202
		386	695
		475	309
		489	399
		495	114
		526	437
		574	287
		697	396
		730	544
		332	576
		145	172
		781
		274
		691
		397
		444
		333
		359
		242
		254
		436
		171
		268
		138
		81
		219
		519
		671
		413
		313
		659
		317
		247
		314
		501
		314
		484
		365
		660
		216
		361
		473
		314
		164
		333
		255
		265
		422
		402
		261
		181
		282
		435
		241
		209
		173
		225
		415
		245
		267
		295
		251
		180
		430
		160
		198
		199
		321
		313
		274
		356
		314
		330
		216
		235
		705
		298
		226
		198
		221
		501
		316
		409
		353
		287
