# Supplementary material for: Proximal and distal spinal neurons innervating multiple synergist and antagonist motor pools
Source: eLife. 2021 Nov 2;10:e70858. doi: 10.7554/eLife.70858 (PMC8631798; doi:10.7554/eLife.70858)
Supplement: Figure 4—source data 1. [file elife-70858-fig4-data1.xlsx]

## Sheet: Feuil1
Sample	Part of Spinal Cord	labelling	Muscles	Medio_Lateral	Dorso_Ventral
170411n3	Cervical	mCherry	LG	-256.87	-298.348
170503n2	Cervical	mCherry	LG	-239.104	-296.591
170503n2	Cervical	eGFP; mCherry	LG	-258.346	-286.827
170503n1	Cervical	mCherry	LG	-186.667	-286.538
170411n3	Cervical	mCherry	LG	-225.736	-265.724
170503n2	Cervical	mCherry	LG	-162.719	-242.225
170411n3	Cervical	mCherry	LG	-272.849	-241.346
170503n1	Cervical	mCherry	LG	-215.669	-232.609
170503n1	Cervical	mCherry	LG	-155.793	-210.432
170411n3	Cervical	mCherry	LG	-236.007	-206.163
170411n3	Cervical	mCherry	LG	-191.285	-203.976
170411n3	Cervical	mCherry	LG	-191.818	-203.855
170411n3	Cervical	mCherry	LG	-189.72	-194.618
170503n2	Cervical	mCherry	LG	-192.222	-189.021
170503n1	Cervical	mCherry	LG	165.192	-187.129
170411n3	Cervical	mCherry	LG	-165.948	-154.23
170503n2	Cervical	mCherry	LG	-186.022	-146.104
170503n1	Cervical	mCherry	LG	-92.1598	-139.335
170503n2	Cervical	mCherry	LG	102.107	-137.621
170503n2	Cervical	mCherry	LG	364.894	-19.2513
170411n3	Cervical	mCherry	LG	385.778	231.232
170503n1	Thoracic	mCherry	LG	-173.465	-91.5648
170503n1	Thoracic	mCherry	LG	380.545	25.0877
170503n1	Thoracic	mCherry	LG	273.002	202.952
170503n1	Thoracic	mCherry	LG	261.603	60.8929
170503n1	Thoracic	mCherry	LG	298.462	106.814
170503n1	Thoracic	mCherry	LG	-139.806	-119.71
170503n1	Thoracic	mCherry	LG	247.082	-30.9896
170503n1	Thoracic	mCherry	LG	342.986	-74.9347
170503n1	Thoracic	mCherry	LG	321.267	-28.329
170503n1	Thoracic	mCherry	LG	-73.4021	-172.274
170503n1	Thoracic	mCherry	LG	-126.186	284.73
170503n1	Thoracic	mCherry	LG	171.663	-241.964
170503n1	Thoracic	mCherry	LG	-162.332	-77.381
170503n1	Thoracic	mCherry	LG	319.651	35.6655
170503n1	Thoracic	mCherry	LG	424.356	229.63
170503n1	Thoracic	mCherry	LG	-217.391	-42.79
170503n1	Thoracic	mCherry	LG	280.278	203.261
170503n1	Thoracic	mCherry	LG	-62.439	9.62801
170503n1	Thoracic	mCherry	LG	-247.805	-133.067
170503n1	Thoracic	mCherry	LG	-250.34	-94.5
170503n1	Thoracic	mCherry	LG	277.904	179.933
170503n1	Thoracic	mCherry	LG	244.068	70.5357
170503n1	Thoracic	mCherry	LG	260.684	-156.46
170503n1	Thoracic	mCherry	LG	266.667	158.763
170503n1	Thoracic	mCherry	LG	-169.585	-204.262
170503n1	Thoracic	mCherry	LG	359.905	173.785
170503n1	Thoracic	mCherry	LG	273.986	197.656
170503n1	Thoracic	mCherry	LG	306.087	-26.5152
170503n1	Thoracic	mCherry	LG	-122.782	-65.625
170503n1	Thoracic	mCherry	LG	-142.506	-86.9048
170503n1	Thoracic	mCherry	LG	296.104	263.328
170503n1	Thoracic	mCherry	LG	-252.152	-70
170503n1	Thoracic	mCherry	LG	143.377	-143.351
170503n1	Thoracic	mCherry	LG	39.4805	18.9329
170503n1	Thoracic	mCherry	LG	64.4156	-32.5798
170503n1	Thoracic	mCherry	LG	41.5584	-0.930851
170503n1	Thoracic	mCherry	LG	368.627	222.097
170503n1	Thoracic	mCherry	LG	332.791	-35.6887
170503n1	Thoracic	mCherry	LG	-56.4477	143.241
170503n1	Thoracic	mCherry	LG	-14.2395	-72.9167
170503n1	Thoracic	mCherry	LG	349.171	48.8889
170503n1	Thoracic	mCherry	LG	417.241	214.828
170503n1	Thoracic	mCherry	LG	-238.15	-43.5943
170503n1	Thoracic	mCherry	LG	236.678	236.628
170503n1	Thoracic	mCherry	LG	-288.685	-40.6728
170503n1	Thoracic	mCherry	LG	-314.474	-74.2424
170503n1	Thoracic	mCherry	LG	367.059	163.542
170503n1	Thoracic	mCherry	LG	-88.0259	-102.805
170503n1	Thoracic	mCherry	LG	-182.699	-132.119
170503n1	Thoracic	mCherry	LG	-309.924	-43.1507
170503n1	Thoracic	mCherry	LG	434.375	206.872
170503n1	Thoracic	mCherry	LG	-165.468	16.6667
170503n1	Thoracic	mCherry	LG	-159.509	-266.263
170503n1	Thoracic	mCherry	LG	364.835	19.2982
170503n1	Thoracic	mCherry	LG	-136.585	-137.003
170503n1	Thoracic	mCherry	LG	79.4425	-39.7507
170503n1	Thoracic	mCherry	LG	-2.74914	-70
170503n1	Thoracic	mCherry	LG	-216.393	-38.5417
170503n1	Thoracic	mCherry	LG	-262.295	-44.7917
170503n1	Thoracic	mCherry	LG	-67.6259	13.9648
170503n1	Thoracic	mCherry	LG	412.95	197.411
170503n1	Thoracic	mCherry	LG	-134.653	67.8082
170503n1	Thoracic	mCherry	LG	-211.043	152.065
170503n2	Thoracic	mCherry	LG	248.552	21.8254
170503n2	Thoracic	mCherry	LG	294.878	169.147
170503n2	Thoracic	mCherry	LG	-184.362	-80.3279
170503n2	Thoracic	mCherry	LG	181.56	97.9592
170503n2	Thoracic	mCherry	LG	-174.79	-96.5181
170503n2	Thoracic	mCherry	LG	177.672	50.1012
170503n2	Thoracic	mCherry	LG	-144.568	-185.849
170503n2	Thoracic	mCherry	LG	295.098	2.26804
170503n2	Thoracic	mCherry	LG	43.7956	-56.2327
170503n2	Thoracic	mCherry	LG	296.837	25.0474
170503n2	Thoracic	mCherry	LG	-101.31	15.8046
170503n2	Thoracic	mCherry	LG	298.783	-24.858
170503n2	Thoracic	mCherry	LG	-179.592	-123.225
170503n2	Thoracic	mCherry	LG	-113.501	-181.873
170503n2	Thoracic	mCherry	LG	-203.204	-75.0755
170503n2	Thoracic	mCherry	LG	366.337	14.1865
170503n2	Thoracic	mCherry	LG	-173.187	-21.6901
170503n2	Thoracic	mCherry	LG	370.133	46.7091
170503n2	Thoracic	mCherry	LG	291.646	3.37423
170503n2	Thoracic	mCherry	LG	208.608	95.6033
170503n2	Thoracic	mCherry	LG	11.1392	8.99796
170503n2	Thoracic	mCherry	LG	345.592	-69.174
170503n2	Thoracic	mCherry	LG	36.0563	7.98755
170503n2	Thoracic	mCherry	LG	285.873	27.2165
170503n2	Thoracic	mCherry	LG	-116.364	-98.0422
170503n2	Thoracic	mCherry	LG	-220.69	-166.515
170503n2	Thoracic	mCherry	LG	161.728	124.085
170503n2	Thoracic	mCherry	LG	22.4852	5.92672
170503n2	Thoracic	mCherry	LG	172.781	-85.4167
170503n2	Thoracic	mCherry	LG	391.385	-14.9148
170503n2	Thoracic	mCherry	LG	152.785	-193.393
170503n2	Thoracic	mCherry	LG	446.626	420.988
170503n2	Thoracic	mCherry	LG	341.433	45.7356
170503n2	Thoracic	mCherry	LG	433.333	176.573
170503n2	Thoracic	mCherry	LG	352.941	344.635
170503n2	Thoracic	mCherry	LG	-74.7126	-115.19
170503n2	Thoracic	mCherry	LG	475.706	256.823
170503n2	Thoracic	mCherry	LG	-54.2373	-158.987
170503n2	Thoracic	mCherry	LG	358.912	-44.9254
170503n2	Thoracic	mCherry	LG	335.952	-58.5075
170503n2	Thoracic	mCherry	LG	292.26	-7.16374
170503n2	Thoracic	mCherry	LG	-252.121	-92.3611
170503n2	Thoracic	mCherry	LG	132.523	128.998
170503n2	Thoracic	mCherry	LG	374.154	88.3929
170503n2	Thoracic	mCherry	LG	-186.997	265.158
170503n2	Thoracic	mCherry	LG	192.593	153.18
170503n2	Thoracic	mCherry	LG	255.108	-46.5318
170503n2	Thoracic	mCherry	LG	336.842	-39.9123
170503n2	Thoracic	mCherry	LG	413.622	160.158
170503n2	Thoracic	mCherry	LG	214.085	207.263
170503n2	Thoracic	mCherry	LG	-190.937	-12.1835
170503n2	Thoracic	mCherry	LG	87.1287	-99.3958
170503n2	Thoracic	mCherry	LG	-35.5556	-103.313
170503n2	Thoracic	mCherry	LG	23.4432	-55.4167
170503n2	Thoracic	mCherry	LG	-17.931	-182.043
170503n2	Thoracic	mCherry	LG	-230.769	-76.0383
170503n2	Thoracic	mCherry	LG	-61.442	49.0664
170503n2	Thoracic	mCherry	LG	-289.968	199.8
170503n2	Thoracic	mCherry	LG	397.112	184.174
170503n2	Thoracic	mCherry	LG	416.949	233.491
170503n2	Thoracic	mCherry	LG	-154.341	-30
170503n2	Thoracic	mCherry	LG	463.158	149.676
170503n2	Thoracic	mCherry	LG	299.62	159.31
170503n2	Thoracic	mCherry	LG	347.325	-25.7493
170503n2	Thoracic	mCherry	LG	-185.874	-52.8523
170503n2	Thoracic	mCherry	LG	-236.431	-110.403
170503n2	Thoracic	mCherry	LG	-210.072	-113.021
170503n2	Thoracic	mCherry	LG	-306.849	-80.5
170503n2	Thoracic	mCherry	LG	331.518	146.827
170503n2	Thoracic	mCherry	LG	400	118.293
170503n2	Thoracic	mCherry	LG	265.438	-160.204
170503n2	Thoracic	mCherry	LG	386.813	-63.0225
170503n2	Thoracic	mCherry	LG	465.116	178.219
170503n2	Thoracic	mCherry	LG	-219.697	-113.235
170503n2	Thoracic	mCherry	LG	-40.1384	138.365
170503n2	Thoracic	mCherry	LG	22.9885	141.778
170503n2	Thoracic	mCherry	LG	356.303	21.5909
170503n2	Thoracic	mCherry	LG	-190.323	-102.586
170503n2	Thoracic	mCherry	LG	393.469	220
170503n2	Thoracic	mCherry	LG	259.109	142.51
170503n2	Thoracic	mCherry	LG	332.374	-24.6006
170503n2	Thoracic	mCherry	LG	336.255	83.7675
170503n2	Thoracic	mCherry	LG	305.036	201.806
170503n2	Thoracic	mCherry	LG	-194.366	-48.5836
170411n2	Thoracic	mCherry	LG	-246.632	-178.908
170411n2	Thoracic	mCherry	LG	-131.856	-163.398
170411n2	Thoracic	mCherry	LG	-98.6301	-143.952
170411n2	Thoracic	mCherry	LG	-40.9556	-114.815
170411n2	Thoracic	mCherry	LG	-199.288	-78.6154
170411n2	Thoracic	mCherry	LG	-210.909	-72.8707
170411n2	Thoracic	mCherry	LG	318.725	-72.1538
170411n2	Thoracic	mCherry	LG	293.805	-62.5758
170411n2	Thoracic	mCherry	LG	-5.03145	-57.2022
170411n2	Thoracic	mCherry	LG	345.382	-51.7808
170411n2	Thoracic	mCherry	LG	336.918	-48.005
170411n2	Thoracic	mCherry	LG	102.655	-46.7277
170411n2	Thoracic	mCherry	LG	329.134	-28.7798
170411n2	Thoracic	mCherry	LG	-174.101	-27.762
170411n2	Thoracic	mCherry	LG	263.014	-15.427
170411n2	Thoracic	mCherry	LG	359.494	-13.4615
170411n2	Thoracic	mCherry	LG	310.345	-2.03488
170411n2	Thoracic	mCherry	LG	238.017	3.75854
170411n2	Thoracic	mCherry	LG	279.688	18.9655
170411n2	Thoracic	mCherry	LG	363.077	29.7872
170411n2	Thoracic	mCherry	LG	129.084	40.9429
170411n2	Thoracic	mCherry	LG	-5.53633	52.4319
170411n2	Thoracic	mCherry	LG	342.857	54.5045
170411n2	Thoracic	mCherry	LG	44.2478	56.4103
170411n2	Thoracic	mCherry	LG	322.788	66.6978
170411n2	Thoracic	mCherry	LG	251.282	151.282
170411n2	Thoracic	mCherry	LG	338.202	153.438
170411n2	Thoracic	mCherry	LG	386.73	183.333
170411n2	Thoracic	mCherry	LG	238.337	192.395
170411n2	Thoracic	mCherry	LG	373.333	257.646
170503n1	Thoracic	eGFP; mCherry	LG	-243.066	95.5556
170503n1	Thoracic	eGFP; mCherry	LG	232.397	110.609
170503n1	Thoracic	eGFP; mCherry	LG	198.19	72.5888
170503n1	Thoracic	eGFP; mCherry	LG	377.376	236.379
170503n1	Thoracic	eGFP; mCherry	LG	-149.278	-80.6854
170503n1	Thoracic	eGFP; mCherry	LG	320.329	6.70732
170503n1	Thoracic	eGFP; mCherry	LG	332.649	4.79094
170503n1	Thoracic	eGFP; mCherry	LG	261.062	190.836
170503n1	Thoracic	eGFP; mCherry	LG	194.848	183.651
170503n1	Thoracic	eGFP; mCherry	LG	195.785	153.201
170503n1	Thoracic	eGFP; mCherry	LG	-198.206	-83.3333
170503n1	Thoracic	eGFP; mCherry	LG	-296.861	-57.1429
170503n1	Thoracic	eGFP; mCherry	LG	337.292	231.717
170503n1	Thoracic	eGFP; mCherry	LG	344.921	-57.1782
170503n1	Thoracic	eGFP; mCherry	LG	307.901	5.84071
170503n1	Thoracic	eGFP; mCherry	LG	218.267	9.25926
170503n1	Thoracic	eGFP; mCherry	LG	-73.0435	-54.8589
170503n1	Thoracic	eGFP; mCherry	LG	259.956	221.275
170503n1	Thoracic	eGFP; mCherry	LG	-263.415	-140.895
170503n1	Thoracic	eGFP; mCherry	LG	-267.317	-150.958
170503n1	Thoracic	eGFP; mCherry	LG	297.039	14.8398
170503n1	Thoracic	eGFP; mCherry	LG	-257.596	-108.5
170503n1	Thoracic	eGFP; mCherry	LG	71.3959	69.5616
170503n1	Thoracic	eGFP; mCherry	LG	-210.319	-59.5238
170503n1	Thoracic	eGFP; mCherry	LG	-172.397	-211.273
170503n1	Thoracic	eGFP; mCherry	LG	324.156	255.857
170503n1	Thoracic	eGFP; mCherry	LG	-211.99	-28.866
170503n1	Thoracic	eGFP; mCherry	LG	301.401	9.53206
170503n1	Thoracic	eGFP; mCherry	LG	-113.916	-59.6591
170503n1	Thoracic	eGFP; mCherry	LG	93.9683	-165.591
170503n1	Thoracic	eGFP; mCherry	LG	226.791	-56.7568
170503n1	Thoracic	eGFP; mCherry	LG	-169.279	-34.4068
170503n1	Thoracic	eGFP; mCherry	LG	-314.95	-30.3819
170503n1	Thoracic	eGFP; mCherry	LG	266.25	120.102
170503n1	Thoracic	eGFP; mCherry	LG	170.769	204.348
170503n1	Thoracic	eGFP; mCherry	LG	396.935	109.789
170503n1	Thoracic	eGFP; mCherry	LG	190.698	-69.4215
170503n1	Thoracic	eGFP; mCherry	LG	312.796	-247.465
170503n1	Thoracic	eGFP; mCherry	LG	228.571	-9.23483
170503n1	Thoracic	eGFP; mCherry	LG	58.5366	77.8399
170503n1	Thoracic	eGFP; mCherry	LG	197.909	119.832
170503n1	Thoracic	eGFP; mCherry	LG	131.01	49.162
170503n1	Thoracic	eGFP; mCherry	LG	229.553	185.675
170503n1	Thoracic	eGFP; mCherry	LG	-121.283	-13.5821
170503n2	Thoracic	eGFP; mCherry	LG	-178.758	-52.0888
170503n2	Thoracic	eGFP; mCherry	LG	222.717	-282.225
170503n2	Thoracic	eGFP; mCherry	LG	302.004	-34.3931
170503n2	Thoracic	eGFP; mCherry	LG	388.419	-62.7168
170503n2	Thoracic	eGFP; mCherry	LG	-275.72	205.36
170503n2	Thoracic	eGFP; mCherry	LG	332.683	-165.789
170503n2	Thoracic	eGFP; mCherry	LG	269.268	276.1
170503n2	Thoracic	eGFP; mCherry	LG	293.137	44.2268
170503n2	Thoracic	eGFP; mCherry	LG	189.781	181.594
170503n2	Thoracic	eGFP; mCherry	LG	363.017	-61.6477
170503n2	Thoracic	eGFP; mCherry	LG	80.798	144.796
170503n2	Thoracic	eGFP; mCherry	LG	-120.635	-45.5621
170503n2	Thoracic	eGFP; mCherry	LG	278.075	269.544
170503n2	Thoracic	eGFP; mCherry	LG	8.12183	-98.645
170503n2	Thoracic	eGFP; mCherry	LG	-192.527	180.682
170503n2	Thoracic	eGFP; mCherry	LG	247.089	-9.43396
170503n2	Thoracic	eGFP; mCherry	LG	380.856	27.767
170503n2	Thoracic	eGFP; mCherry	LG	362.72	27.767
170503n2	Thoracic	eGFP; mCherry	LG	250.416	309.588
170503n2	Thoracic	eGFP; mCherry	LG	-101.435	-88.2698
170503n2	Thoracic	eGFP; mCherry	LG	300.599	25.4527
170503n2	Thoracic	eGFP; mCherry	LG	435.928	171.529
170503n2	Thoracic	eGFP; mCherry	LG	154.118	199.138
170503n2	Thoracic	eGFP; mCherry	LG	-206.687	-37.234
170503n2	Thoracic	eGFP; mCherry	LG	263.444	297.046
170503n2	Thoracic	eGFP; mCherry	LG	-63.2768	-164.706
170503n2	Thoracic	eGFP; mCherry	LG	-10.3152	56.8966
170503n2	Thoracic	eGFP; mCherry	LG	347.72	-27.3121
170503n2	Thoracic	eGFP; mCherry	LG	219.077	142.411
170503n2	Thoracic	eGFP; mCherry	LG	200.66	145.349
170503n2	Thoracic	eGFP; mCherry	LG	-233.01	180.04
170503n2	Thoracic	eGFP; mCherry	LG	2.71186	69.4989
170503n2	Thoracic	eGFP; mCherry	LG	271.212	133.944
170503n2	Thoracic	eGFP; mCherry	LG	280.727	98.2571
170503n2	Thoracic	eGFP; mCherry	LG	378.776	147.134
170503n2	Thoracic	eGFP; mCherry	LG	286.758	14.8958
170503n2	Thoracic	eGFP; mCherry	LG	-307.407	29.9395
170503n2	Thoracic	eGFP; mCherry	LG	-128.938	104.082
170503n2	Thoracic	eGFP; mCherry	LG	151.768	259.696
170411n2	Thoracic	eGFP; mCherry	LG	224.779	-154.042
170411n2	Thoracic	eGFP; mCherry	LG	-269.048	-58.6826
170411n2	Thoracic	eGFP; mCherry	LG	272.555	-38.2134
170411n2	Thoracic	eGFP; mCherry	LG	-315.337	-36.1179
170411n2	Thoracic	eGFP; mCherry	LG	300.885	-31.4371
170411n2	Thoracic	eGFP; mCherry	LG	-295.706	-28.3784
170411n2	Thoracic	eGFP; mCherry	LG	-300	-22.1763
170411n2	Thoracic	eGFP; mCherry	LG	50.3937	-18.6275
170411n2	Thoracic	eGFP; mCherry	LG	333.898	-15.3959
170411n2	Thoracic	eGFP; mCherry	LG	-234.65	-4.12736
170411n2	Thoracic	eGFP; mCherry	LG	247.319	-21.7122
170411n2	Thoracic	eGFP; mCherry	LG	313.876	37.0787
170411n2	Thoracic	eGFP; mCherry	LG	376.569	43.9525
