# Supplementary material for: Proximal and distal spinal neurons innervating multiple synergist and antagonist motor pools
Source: eLife. 2021 Nov 2;10:e70858. doi: 10.7554/eLife.70858 (PMC8631798; doi:10.7554/eLife.70858)
Supplement: Figure 5—source data 1. [file elife-70858-fig5-data1.xlsx]

## Sheet: Feuil1
Sample	Part of Spinal Cord	Muscles	Lhx1 Stainning	Medio_Lateral	Dorso_Ventral
170601n10	Cervical	GS	Lhx1-	213.005	-206.039
170601n10	Cervical	GS	Lhx1-	210.834	-232.105
170601n10	Cervical	GS	Lhx1-	129.686	-157.5
170601n10	Cervical	GS	Lhx1-	164.394	-209.647
170601n10	Cervical	GS	Lhx1-	337.844	-286.941
170623n2	Cervical	GS	Lhx1-	-169.6	-201.54
170623n2	Cervical	GS	Lhx1-	-181.095	-204.545
170623n2	Cervical	GS	Lhx1-	-210.993	-209.451
170623n2	Cervical	GS	Lhx1-	-236.803	-280.879
170623n2	Cervical	GS	Lhx1-	-127.273	-41.172
170623n2	Cervical	GS	Lhx1-	-180.928	-162.931
170623n2	Cervical	GS	Lhx1-	-327.694	-323.814
170623n2	Cervical	GS	Lhx1-	-249.375	-313.816
170623n2	Cervical	GS	Lhx1-	-266.168	-152.528
170623n2	Cervical	GS	Lhx1-	257.948	-101.497
170623n2	Cervical	GS	Lhx1-	-108.012	-124.451
170623n2	Cervical	GS	Lhx1-	-112.81	-114.982
170623n9	Cervical	GS	Lhx1-	-182.743	-294.444
170623n9	Cervical	GS	Lhx1-	149.15	-40.3302
170623n9	Cervical	GS	Lhx1-	-240.654	-264.151
170623n9	Cervical	GS	Lhx1-	-250.719	-289.091
170623n9	Cervical	GS	Lhx1-	-226.549	-275.207
170623n9	Cervical	GS	Lhx1-	358.663	-102.779
170623n9	Cervical	GS	Lhx1-	-395.887	-254.83
170531n5	Cervical	GS	Lhx1-	-111.872	-63.2405
170601n10	Cervical	GS	Lhx1+	75.8915	-78.9407
170601n10	Cervical	GS	Lhx1+	576.86	-6.91117
170601n10	Cervical	GS	Lhx1+	-196.62	-354.098
170601n10	Cervical	GS	Lhx1+	-393.23	-162.595
170601n10	Cervical	GS	Lhx1+	-71.4066	-28.4274
170601n10	Cervical	GS	Lhx1+	-234.637	-392.308
170601n10	Cervical	GS	Lhx1+	300.273	-222.982
170623n2	Cervical	GS	Lhx1+	-131.674	-24.2617
