# Supplementary material for: Proximal and distal spinal neurons innervating multiple synergist and antagonist motor pools
Source: eLife. 2021 Nov 2;10:e70858. doi: 10.7554/eLife.70858 (PMC8631798; doi:10.7554/eLife.70858)
Supplement: Figure 6—figure supplement 2—source data 1. [file elife-70858-fig6-figsupp2-data1.xlsx]

## Sheet: Figure 6-figure supp 2B,D,F
Sample	Part of Spinal Cord	labelling	Muscles	Medio_Lateral	Dorso_Ventral
170601n5	Thoracic	divergent	FMs+GS	-101.493	-118.139
170601n4	Thoracic	divergent	FMs+GS	259.368	-91.3043
170601n5	Thoracic	divergent	FMs+GS	312.458	-83.3333
170601n5	Thoracic	divergent	FMs+GS	325.316	-15.0943
170601n5	Thoracic	mCherry	FMs	-447.368	165.312
170601n4	Thoracic	mCherry	FMs	-370.06	57.3146
170601n4	Thoracic	mCherry	FMs	-365.533	50.9756
170601n4	Thoracic	mCherry	FMs	-355.172	106.508
170601n4	Thoracic	mCherry	FMs	-352.857	109.16
170601n4	Thoracic	mCherry	FMs	-343.066	116.73
170601n4	Thoracic	mCherry	FMs	-338.361	86.4286
170601n4	Thoracic	mCherry	FMs	-335.802	105.295
170601n4	Thoracic	mCherry	FMs	-333.787	-175
170601n6	Thoracic	mCherry	FMs	-328.492	-110.676
170601n5	Thoracic	mCherry	FMs	-328.116	-110.221
170601n4	Thoracic	mCherry	FMs	-327.473	-42
170601n4	Thoracic	mCherry	FMs	-327.273	231.349
170601n5	Thoracic	mCherry	FMs	-325.882	30.2198
170601n5	Thoracic	mCherry	FMs	-316.511	52.4809
170601n5	Thoracic	mCherry	FMs	-314.65	-166.393
170601n4	Thoracic	mCherry	FMs	-313.433	63
170601n4	Thoracic	mCherry	FMs	-311.419	-28.6778
170601n5	Thoracic	mCherry	FMs	-310.972	-69.0789
170601n4	Thoracic	mCherry	FMs	-305.699	-123.472
170601n5	Thoracic	mCherry	FMs	-302.564	17.8435
170601n4	Thoracic	mCherry	FMs	-299.535	-145.3
170601n4	Thoracic	mCherry	FMs	-292.937	-3.71025
170601n5	Thoracic	mCherry	FMs	-292.15	116.008
170601n5	Thoracic	mCherry	FMs	-291.765	33.2418
170601n5	Thoracic	mCherry	FMs	-289.172	-124.317
170601n5	Thoracic	mCherry	FMs	-282.803	-115.212
170601n4	Thoracic	mCherry	FMs	-274.406	-67.4931
170601n4	Thoracic	mCherry	FMs	-273.292	-58.3333
170601n4	Thoracic	mCherry	FMs	-272.673	-11.4007
170601n4	Thoracic	mCherry	FMs	-271.386	29.2553
170601n4	Thoracic	mCherry	FMs	-269.214	164.695
170601n4	Thoracic	mCherry	FMs	-267.101	-11.5809
170601n5	Thoracic	mCherry	FMs	-267.077	-159.197
170601n5	Thoracic	mCherry	FMs	-264.815	-188.172
170601n4	Thoracic	mCherry	FMs	-255.718	16.9231
170601n4	Thoracic	mCherry	FMs	-255.072	-107.196
170601n4	Thoracic	mCherry	FMs	-254.671	-38.2042
170601n5	Thoracic	mCherry	FMs	-254.068	-77.6562
170601n5	Thoracic	mCherry	FMs	-252.444	217.905
170601n5	Thoracic	mCherry	FMs	-245.317	-125.741
170601n4	Thoracic	mCherry	FMs	-243.599	-65.7718
170601n5	Thoracic	mCherry	FMs	-243.533	17.8328
170601n4	Thoracic	mCherry	FMs	-242.581	14.8115
170601n5	Thoracic	mCherry	FMs	-241.916	-34.6045
170601n5	Thoracic	mCherry	FMs	-239.755	-47.4734
170601n5	Thoracic	mCherry	FMs	-238.636	21.256
170601n5	Thoracic	mCherry	FMs	-236.601	-144.667
170601n5	Thoracic	mCherry	FMs	-233.514	77.6361
170601n4	Thoracic	mCherry	FMs	-229.448	-117.949
170601n4	Thoracic	mCherry	FMs	-223.438	-171.329
170601n4	Thoracic	mCherry	FMs	-218.571	-20.4467
170601n6	Thoracic	mCherry	FMs	-218.546	-201.708
170601n5	Thoracic	mCherry	FMs	-217.857	-161.389
170601n5	Thoracic	mCherry	FMs	-216.718	-180.083
170601n6	Thoracic	mCherry	FMs	-210.723	-74.4159
170601n4	Thoracic	mCherry	FMs	-210.042	-89.8649
170601n5	Thoracic	mCherry	FMs	-208.307	-80.7692
170601n4	Thoracic	mCherry	FMs	-206.498	-89.0459
170601n4	Thoracic	mCherry	FMs	-204.947	-30
170601n4	Thoracic	mCherry	FMs	-203.352	-41.791
170601n4	Thoracic	mCherry	FMs	-198.571	143.798
170601n4	Thoracic	mCherry	FMs	-193.333	-136.267
170601n4	Thoracic	mCherry	FMs	-189.17	-144.7
170601n4	Thoracic	mCherry	FMs	-186.572	-83.75
170601n6	Thoracic	mCherry	FMs	-185.806	-140
170601n4	Thoracic	mCherry	FMs	-183.394	-72.093
170601n4	Thoracic	mCherry	FMs	-179.412	-268.858
170601n5	Thoracic	mCherry	FMs	-177.644	-237.222
170601n4	Thoracic	mCherry	FMs	-176.232	-77.3006
170601n4	Thoracic	mCherry	FMs	-173.913	-131.25
170601n4	Thoracic	mCherry	FMs	-173.626	-133
170601n4	Thoracic	mCherry	FMs	-173.294	-126.621
170601n5	Thoracic	mCherry	FMs	-171.591	-138
170601n5	Thoracic	mCherry	FMs	-171.053	-146.203
170601n4	Thoracic	mCherry	FMs	-170.976	-155.814
170601n4	Thoracic	mCherry	FMs	-168.235	-220.411
170601n4	Thoracic	mCherry	FMs	-168.198	-82.5
170601n5	Thoracic	mCherry	FMs	-159.248	25.6019
170601n4	Thoracic	mCherry	FMs	-158.007	-265
170601n4	Thoracic	mCherry	FMs	-150.318	-146.57
170601n5	Thoracic	mCherry	FMs	-148.193	-259.153
170601n5	Thoracic	mCherry	FMs	-147.962	-185.362
170601n5	Thoracic	mCherry	FMs	-147.727	-180.052
170601n4	Thoracic	mCherry	FMs	-146.497	36.0504
170601n6	Thoracic	mCherry	FMs	-145.588	-30.9392
170601n4	Thoracic	mCherry	FMs	-142.943	-172.15
170601n5	Thoracic	mCherry	FMs	-142.415	-291.909
170601n5	Thoracic	mCherry	FMs	-142.249	-62.2881
170601n6	Thoracic	mCherry	FMs	-141.887	-204.348
170601n6	Thoracic	mCherry	FMs	-139.194	98.3368
170601n4	Thoracic	mCherry	FMs	-132.551	-192.44
170601n4	Thoracic	mCherry	FMs	-123.183	-120.312
170601n6	Thoracic	mCherry	FMs	-122.162	-208.133
170601n5	Thoracic	mCherry	FMs	-121.951	-204.955
170601n4	Thoracic	mCherry	FMs	-116.289	-255.769
170601n5	Thoracic	mCherry	FMs	-115.942	-177.901
170601n4	Thoracic	mCherry	FMs	-114.673	-265.089
170601n5	Thoracic	mCherry	FMs	-112.538	-192.44
170601n5	Thoracic	mCherry	FMs	-110.429	-162.167
170601n5	Thoracic	mCherry	FMs	-110.256	-76.4901
170601n5	Thoracic	mCherry	FMs	-105.366	-207.012
170601n6	Thoracic	mCherry	FMs	-101.923	35.8696
170601n4	Thoracic	mCherry	FMs	-98.5075	218
170601n4	Thoracic	mCherry	FMs	-97.446	-208.955
170601n4	Thoracic	mCherry	FMs	-89.5307	-141.207
170601n5	Thoracic	mCherry	FMs	-87.7743	-226.019
170601n5	Thoracic	mCherry	FMs	-86.0215	59.1837
170601n5	Thoracic	mCherry	FMs	-83.8095	-206.966
170601n5	Thoracic	mCherry	FMs	-83.6364	14.8936
170601n5	Thoracic	mCherry	FMs	-83.4356	-207.026
170601n4	Thoracic	mCherry	FMs	-80.4348	-210
170601n5	Thoracic	mCherry	FMs	-77.4194	-227.027
170601n5	Thoracic	mCherry	FMs	-76.4543	-249.798
170601n4	Thoracic	mCherry	FMs	-76.2542	-105.496
170601n6	Thoracic	mCherry	FMs	-76.1905	-176.795
170601n4	Thoracic	mCherry	FMs	-75.6477	29.1176
170601n5	Thoracic	mCherry	FMs	-73.9274	-200.163
170601n4	Thoracic	mCherry	FMs	-69.7819	-144.949
170601n4	Thoracic	mCherry	FMs	-69.3333	-238.194
170601n4	Thoracic	mCherry	FMs	-65.9176	-8.53659
170601n4	Thoracic	mCherry	FMs	-64.9485	-159.591
170601n4	Thoracic	mCherry	FMs	-64.8318	-175
170601n4	Thoracic	mCherry	FMs	-64.0569	-163.251
170601n6	Thoracic	mCherry	FMs	-63.9676	23.913
170601n6	Thoracic	mCherry	FMs	-61.7647	-174.011
170601n5	Thoracic	mCherry	FMs	-61.3569	-145.566
170601n4	Thoracic	mCherry	FMs	-61.2378	-45.0368
170601n5	Thoracic	mCherry	FMs	-58.7031	101.507
170601n4	Thoracic	mCherry	FMs	-58.5366	-183.213
170601n6	Thoracic	mCherry	FMs	-52.7859	-97.7157
170601n5	Thoracic	mCherry	FMs	-48.5623	66.3317
170601n6	Thoracic	mCherry	FMs	-47.1655	85.0329
170601n5	Thoracic	mCherry	FMs	-44.6927	23.2804
170601n5	Thoracic	mCherry	FMs	-40.7407	-141.864
170601n5	Thoracic	mCherry	FMs	-39.7727	-165.278
170601n5	Thoracic	mCherry	FMs	-37.6471	31.6699
170601n5	Thoracic	mCherry	FMs	-37.1041	23.4875
170601n4	Thoracic	mCherry	FMs	-36.478	-156.228
170601n4	Thoracic	mCherry	FMs	-34.632	-15.9091
170601n5	Thoracic	mCherry	FMs	-34.1463	141.257
170601n4	Thoracic	mCherry	FMs	-33.121	-201.765
170601n5	Thoracic	mCherry	FMs	-19.4842	-141.304
170601n5	Thoracic	mCherry	FMs	-15.5556	-50.2994
170601n4	Thoracic	mCherry	FMs	-8.39161	-212.821
170601n4	Thoracic	mCherry	FMs	-6.01504	67.0732
170601n4	Thoracic	mCherry	FMs	-1.31148	-89.0459
170601n4	Thoracic	mCherry	FMs	-1.2945	45.1786
170601n4	Thoracic	mCherry	FMs	1.55039	46.0352
170601n4	Thoracic	mCherry	FMs	8	-76.087
170601n4	Thoracic	mCherry	FMs	9.45946	78.0645
170601n4	Thoracic	mCherry	FMs	14.2395	-47.7667
170601n5	Thoracic	mCherry	FMs	17.0492	72.6651
170601n5	Thoracic	mCherry	FMs	21.843	-111.408
170601n4	Thoracic	mCherry	FMs	26.2548	-70.4082
170601n4	Thoracic	mCherry	FMs	26.3566	-60.7353
170601n6	Thoracic	mCherry	FMs	28.3465	49.8031
170601n4	Thoracic	mCherry	FMs	29.1139	-41.6667
170601n4	Thoracic	mCherry	FMs	29.682	-53.9801
170601n6	Thoracic	mCherry	FMs	29.682	114.583
170601n5	Thoracic	mCherry	FMs	31.068	-5.61497
170601n5	Thoracic	mCherry	FMs	41.2903	126.766
170601n5	Thoracic	mCherry	FMs	41.5584	-51.1749
170601n4	Thoracic	mCherry	FMs	42.9066	3.6105
170601n6	Thoracic	mCherry	FMs	45.5696	100.088
170601n6	Thoracic	mCherry	FMs	49.5935	-9.28382
170601n4	Thoracic	mCherry	FMs	50.8361	15.9266
170601n4	Thoracic	mCherry	FMs	51.5723	-40.2174
170601n4	Thoracic	mCherry	FMs	52.1127	-30.4775
170601n4	Thoracic	mCherry	FMs	54.6763	9.64912
170601n5	Thoracic	mCherry	FMs	55.1724	7.09677
170601n5	Thoracic	mCherry	FMs	58.3587	-8.77193
170601n6	Thoracic	mCherry	FMs	61.4555	58.3977
170601n5	Thoracic	mCherry	FMs	61.6438	133.211
170601n4	Thoracic	mCherry	FMs	64.1026	-5.14706
170601n6	Thoracic	mCherry	FMs	64.1221	113.984
170601n5	Thoracic	mCherry	FMs	65.2038	-8.31135
170601n4	Thoracic	mCherry	FMs	67.1053	-136.49
170601n4	Thoracic	mCherry	FMs	67.1233	-71.5259
170601n5	Thoracic	mCherry	FMs	67.2566	-38.2423
170601n5	Thoracic	mCherry	FMs	69.6697	-96.6418
170601n4	Thoracic	mCherry	FMs	70.0337	23.9651
170601n4	Thoracic	mCherry	FMs	70.7581	-184.157
170601n4	Thoracic	mCherry	FMs	72.1174	161.129
170601n5	Thoracic	mCherry	FMs	77.9026	77.2097
170601n4	Thoracic	mCherry	FMs	78.2051	7.25275
170601n4	Thoracic	mCherry	FMs	79.1111	12.1599
170601n6	Thoracic	mCherry	FMs	85.6305	-197.784
170601n6	Thoracic	mCherry	FMs	85.8757	-29.8107
170601n5	Thoracic	mCherry	FMs	87.0748	137.014
170601n4	Thoracic	mCherry	FMs	87.2117	132.324
170601n5	Thoracic	mCherry	FMs	87.9725	14.0127
170601n4	Thoracic	mCherry	FMs	88.8889	-6.51596
170601n4	Thoracic	mCherry	FMs	92.5267	-61.25
170601n6	Thoracic	mCherry	FMs	95.3586	1.94346
170601n5	Thoracic	mCherry	FMs	98.9091	17.2211
170601n4	Thoracic	mCherry	FMs	99.0712	193.519
170601n6	Thoracic	mCherry	FMs	107.363	113.373
170601n5	Thoracic	mCherry	FMs	107.5	9.67033
170601n5	Thoracic	mCherry	FMs	108.333	47.5874
170601n5	Thoracic	mCherry	FMs	111.565	26.2367
170601n4	Thoracic	mCherry	FMs	113.225	19.8454
170601n5	Thoracic	mCherry	FMs	115.989	-105.094
170601n4	Thoracic	mCherry	FMs	116.364	-56.2327
170601n5	Thoracic	mCherry	FMs	117.492	84.5351
170601n4	Thoracic	mCherry	FMs	120	204.185
170601n4	Thoracic	mCherry	FMs	121.3	-172.478
170601n4	Thoracic	mCherry	FMs	121.622	-164.651
170601n4	Thoracic	mCherry	FMs	121.778	235.714
170601n4	Thoracic	mCherry	FMs	125.905	178.453
170601n6	Thoracic	mCherry	FMs	127.224	20.1737
170601n4	Thoracic	mCherry	FMs	127.66	-43.4783
170601n4	Thoracic	mCherry	FMs	135.15	48.8417
170601n4	Thoracic	mCherry	FMs	136.255	6.20301
170601n4	Thoracic	mCherry	FMs	136.765	-165.957
170601n4	Thoracic	mCherry	FMs	138.462	44.7253
170601n4	Thoracic	mCherry	FMs	139.211	36.8557
170601n4	Thoracic	mCherry	FMs	140.139	193.015
170601n5	Thoracic	mCherry	FMs	140.575	169.4
170601n5	Thoracic	mCherry	FMs	142.466	230
170601n4	Thoracic	mCherry	FMs	143.243	-167.135
170601n5	Thoracic	mCherry	FMs	146.108	125.49
170601n4	Thoracic	mCherry	FMs	146.237	-27.4324
170601n4	Thoracic	mCherry	FMs	149.239	103.543
170601n5	Thoracic	mCherry	FMs	151.724	8.04388
170601n6	Thoracic	mCherry	FMs	156.974	296.373
170601n5	Thoracic	mCherry	FMs	158.442	97.9
170601n4	Thoracic	mCherry	FMs	158.491	121.522
170601n5	Thoracic	mCherry	FMs	159.434	-82.4029
170601n4	Thoracic	mCherry	FMs	163.696	-20.5357
170601n4	Thoracic	mCherry	FMs	164.454	153.774
170601n5	Thoracic	mCherry	FMs	169.784	286.263
170601n5	Thoracic	mCherry	FMs	174.92	114.717
170601n5	Thoracic	mCherry	FMs	179.345	42.922
170601n5	Thoracic	mCherry	FMs	180.505	-32.3529
170601n4	Thoracic	mCherry	FMs	182.857	143.822
170601n4	Thoracic	mCherry	FMs	185.333	20.9172
170601n5	Thoracic	mCherry	FMs	187.05	36.6041
170601n4	Thoracic	mCherry	FMs	187.413	-40.1146
170601n6	Thoracic	mCherry	FMs	190.631	43.4454
170601n4	Thoracic	mCherry	FMs	192.893	-51.4493
170601n5	Thoracic	mCherry	FMs	193.548	-54.7146
170601n4	Thoracic	mCherry	FMs	193.548	32.7093
170601n4	Thoracic	mCherry	FMs	194.433	40.566
170601n6	Thoracic	mCherry	FMs	195.122	37.8992
170601n5	Thoracic	mCherry	FMs	196.904	-26.435
170601n4	Thoracic	mCherry	FMs	197.5	88.5593
170601n4	Thoracic	mCherry	FMs	199.381	100.949
170601n4	Thoracic	mCherry	FMs	202.941	120.959
170601n5	Thoracic	mCherry	FMs	206.25	107.582
170601n4	Thoracic	mCherry	FMs	206.272	-52.6385
170601n5	Thoracic	mCherry	FMs	206.652	296.735
170601n5	Thoracic	mCherry	FMs	206.86	-196.99
170601n4	Thoracic	mCherry	FMs	207.774	129.912
170601n4	Thoracic	mCherry	FMs	209.288	61.1111
170601n6	Thoracic	mCherry	FMs	210.468	159.677
170601n4	Thoracic	mCherry	FMs	211.765	77.0241
170601n5	Thoracic	mCherry	FMs	216.802	100.977
170601n4	Thoracic	mCherry	FMs	217.191	254.746
170601n5	Thoracic	mCherry	FMs	219.737	80.9365
170601n4	Thoracic	mCherry	FMs	223.358	25.2874
170601n4	Thoracic	mCherry	FMs	224.594	208.007
170601n4	Thoracic	mCherry	FMs	226.207	185.3
170601n5	Thoracic	mCherry	FMs	229.139	47.8654
170601n5	Thoracic	mCherry	FMs	229.213	-8
170601n6	Thoracic	mCherry	FMs	231.638	76.5686
170601n4	Thoracic	mCherry	FMs	233.333	29.011
170601n6	Thoracic	mCherry	FMs	233.628	197.849
170601n5	Thoracic	mCherry	FMs	234.483	205.806
170601n4	Thoracic	mCherry	FMs	235.862	-63.7179
170601n4	Thoracic	mCherry	FMs	236.765	-47.6839
170601n5	Thoracic	mCherry	FMs	237.037	86.6792
170601n4	Thoracic	mCherry	FMs	237.5	25.1695
170601n4	Thoracic	mCherry	FMs	238.177	-15.5374
170601n4	Thoracic	mCherry	FMs	238.621	180.562
170601n5	Thoracic	mCherry	FMs	239.009	-27.6567
170601n4	Thoracic	mCherry	FMs	242.231	36.1842
170601n5	Thoracic	mCherry	FMs	243.928	115.214
170601n6	Thoracic	mCherry	FMs	245.833	-41.3115
170601n5	Thoracic	mCherry	FMs	246.526	76.6221
170601n6	Thoracic	mCherry	FMs	246.843	-22.9058
170601n5	Thoracic	mCherry	FMs	247.619	308.039
170601n4	Thoracic	mCherry	FMs	248.205	112.956
170601n4	Thoracic	mCherry	FMs	250.932	62.4113
170601n4	Thoracic	mCherry	FMs	253.422	116.048
170601n5	Thoracic	mCherry	FMs	254.042	219.098
170601n4	Thoracic	mCherry	FMs	254.804	68.75
170601n6	Thoracic	mCherry	FMs	256.478	20.4124
170601n5	Thoracic	mCherry	FMs	256.655	-27.6056
170601n4	Thoracic	mCherry	FMs	257.077	-26.8053
170601n5	Thoracic	mCherry	FMs	259.06	-187.119
170601n4	Thoracic	mCherry	FMs	259.06	18.6441
170601n4	Thoracic	mCherry	FMs	259.761	-39.9577
170601n4	Thoracic	mCherry	FMs	260.586	105.447
170601n4	Thoracic	mCherry	FMs	261.947	171.357
170601n4	Thoracic	mCherry	FMs	261.972	3.39506
170601n5	Thoracic	mCherry	FMs	263.291	80.5099
170601n4	Thoracic	mCherry	FMs	264.387	66
170601n5	Thoracic	mCherry	FMs	264.499	-156.702
170601n5	Thoracic	mCherry	FMs	264.918	13.6973
170601n4	Thoracic	mCherry	FMs	265.031	-94.0299
170601n5	Thoracic	mCherry	FMs	267.347	79.1796
170601n5	Thoracic	mCherry	FMs	267.626	64.7611
170601n4	Thoracic	mCherry	FMs	267.961	24.0494
170601n5	Thoracic	mCherry	FMs	268.063	-57.931
170601n4	Thoracic	mCherry	FMs	269.534	117.511
170601n4	Thoracic	mCherry	FMs	270.877	116.197
170601n4	Thoracic	mCherry	FMs	271.166	203.83
170601n4	Thoracic	mCherry	FMs	271.28	-5.30303
170601n5	Thoracic	mCherry	FMs	272.422	-335.925
170601n4	Thoracic	mCherry	FMs	273.835	-20.5379
170601n5	Thoracic	mCherry	FMs	274.757	30.0995
170601n5	Thoracic	mCherry	FMs	275	-244.142
170601n6	Thoracic	mCherry	FMs	275.603	23.1986
170601n5	Thoracic	mCherry	FMs	277.215	-289.481
170601n5	Thoracic	mCherry	FMs	278.458	-4.20673
170601n5	Thoracic	mCherry	FMs	278.71	17.666
170601n5	Thoracic	mCherry	FMs	280.263	0
170601n4	Thoracic	mCherry	FMs	280.795	14.6341
170601n4	Thoracic	mCherry	FMs	280.882	166.336
170601n4	Thoracic	mCherry	FMs	280.942	151.887
170601n5	Thoracic	mCherry	FMs	282.65	84.0122
170601n5	Thoracic	mCherry	FMs	282.828	-53.8462
170601n5	Thoracic	mCherry	FMs	282.974	-182.976
170601n6	Thoracic	mCherry	FMs	284.984	3.44468
170601n4	Thoracic	mCherry	FMs	286.391	-23.0137
170601n4	Thoracic	mCherry	FMs	286.43	195.536
170601n4	Thoracic	mCherry	FMs	286.667	218.136
170601n4	Thoracic	mCherry	FMs	287.379	6.00437
170601n4	Thoracic	mCherry	FMs	287.77	-37.3887
170601n5	Thoracic	mCherry	FMs	288.319	-8.95141
170601n4	Thoracic	mCherry	FMs	290.221	30.4428
170601n5	Thoracic	mCherry	FMs	290.286	45.1
170601n6	Thoracic	mCherry	FMs	290.837	239.564
170601n5	Thoracic	mCherry	FMs	291.391	-63.5572
170601n5	Thoracic	mCherry	FMs	291.648	275.935
170601n4	Thoracic	mCherry	FMs	291.857	206.1
170601n4	Thoracic	mCherry	FMs	292	11.9094
170601n5	Thoracic	mCherry	FMs	292.877	79.3624
170601n5	Thoracic	mCherry	FMs	293.175	-326.845
170601n5	Thoracic	mCherry	FMs	293.525	-18.7668
170601n4	Thoracic	mCherry	FMs	293.907	-39.2157
170601n4	Thoracic	mCherry	FMs	296	-249.153
170601n4	Thoracic	mCherry	FMs	296.029	-32.3699
170601n4	Thoracic	mCherry	FMs	296.774	-175
170601n4	Thoracic	mCherry	FMs	297.436	150
170601n4	Thoracic	mCherry	FMs	298.932	0
170601n4	Thoracic	mCherry	FMs	300	-3.28125
170601n5	Thoracic	mCherry	FMs	300.929	88.5768
170601n5	Thoracic	mCherry	FMs	301.639	-77.8846
170601n4	Thoracic	mCherry	FMs	302.703	-29.3296
170601n4	Thoracic	mCherry	FMs	302.817	10.1852
170601n4	Thoracic	mCherry	FMs	304.408	-259.202
170601n4	Thoracic	mCherry	FMs	306.08	-18.1425
170601n5	Thoracic	mCherry	FMs	306.271	90.343
170601n6	Thoracic	mCherry	FMs	306.329	-7.29167
170601n5	Thoracic	mCherry	FMs	306.832	71.875
170601n4	Thoracic	mCherry	FMs	308.609	34.308
170601n5	Thoracic	mCherry	FMs	308.982	-58.9888
170601n6	Thoracic	mCherry	FMs	309.353	172.674
170601n6	Thoracic	mCherry	FMs	311.422	0.943396
170601n4	Thoracic	mCherry	FMs	312	-45.2439
170601n5	Thoracic	mCherry	FMs	312.684	-54.038
170601n4	Thoracic	mCherry	FMs	312.704	-36.0158
170601n5	Thoracic	mCherry	FMs	313.217	99.8255
170601n5	Thoracic	mCherry	FMs	313.318	45.8333
170601n5	Thoracic	mCherry	FMs	316.049	78.9649
170601n4	Thoracic	mCherry	FMs	316.06	162.264
170601n5	Thoracic	mCherry	FMs	316.498	31.4286
170601n4	Thoracic	mCherry	FMs	317.82	-165.551
170601n6	Thoracic	mCherry	FMs	318.248	60.5212
170601n5	Thoracic	mCherry	FMs	318.391	43.4677
170601n4	Thoracic	mCherry	FMs	318.627	-122.931
170601n4	Thoracic	mCherry	FMs	319.741	-177.171
170601n5	Thoracic	mCherry	FMs	319.764	69.7674
170601n5	Thoracic	mCherry	FMs	321.526	58.1731
170601n5	Thoracic	mCherry	FMs	322.172	-111.207
170601n4	Thoracic	mCherry	FMs	322.535	-52.1067
170601n4	Thoracic	mCherry	FMs	322.989	42.1533
170601n4	Thoracic	mCherry	FMs	323.506	31.015
170601n5	Thoracic	mCherry	FMs	324.249	-96.9231
170601n4	Thoracic	mCherry	FMs	324.555	-191.935
170601n5	Thoracic	mCherry	FMs	324.555	29.9812
170601n5	Thoracic	mCherry	FMs	325.18	-15.0134
170601n5	Thoracic	mCherry	FMs	326.557	181.424
170601n4	Thoracic	mCherry	FMs	328.826	-43.75
170601n4	Thoracic	mCherry	FMs	329.781	-178.614
170601n5	Thoracic	mCherry	FMs	330.137	-80.7692
170601n5	Thoracic	mCherry	FMs	330.275	87.02
170601n4	Thoracic	mCherry	FMs	330.323	-5.07246
170601n4	Thoracic	mCherry	FMs	331.034	-23.538
170601n4	Thoracic	mCherry	FMs	332.033	196.591
170601n6	Thoracic	mCherry	FMs	332.374	10.6383
170601n4	Thoracic	mCherry	FMs	332.5	1.86441
170601n5	Thoracic	mCherry	FMs	332.895	199.36
170601n5	Thoracic	mCherry	FMs	333.546	-183.241
170601n5	Thoracic	mCherry	FMs	334.211	-127.273
170601n5	Thoracic	mCherry	FMs	334.385	-36.4764
170601n5	Thoracic	mCherry	FMs	334.694	154.102
170601n5	Thoracic	mCherry	FMs	335.018	-12.4317
170601n5	Thoracic	mCherry	FMs	335.178	-14.7643
170601n4	Thoracic	mCherry	FMs	335.458	158.208
170601n4	Thoracic	mCherry	FMs	335.484	220.485
170601n4	Thoracic	mCherry	FMs	336.462	6.35104
170601n4	Thoracic	mCherry	FMs	337.415	13.0952
170601n5	Thoracic	mCherry	FMs	337.459	31.3996
170601n5	Thoracic	mCherry	FMs	339.823	201.378
170601n6	Thoracic	mCherry	FMs	339.837	-241.379
170601n4	Thoracic	mCherry	FMs	340.58	-182.778
170601n4	Thoracic	mCherry	FMs	342.541	37.8253
170601n4	Thoracic	mCherry	FMs	343.448	4.70085
170601n5	Thoracic	mCherry	FMs	344.414	-111.166
170601n5	Thoracic	mCherry	FMs	344.444	-123.636
170601n4	Thoracic	mCherry	FMs	344.476	92.2945
170601n5	Thoracic	mCherry	FMs	344.543	39.1386
170601n4	Thoracic	mCherry	FMs	344.928	-46.6667
170601n4	Thoracic	mCherry	FMs	345.57	-152.778
170601n4	Thoracic	mCherry	FMs	345.631	-16.8
170601n5	Thoracic	mCherry	FMs	346.602	331.095
170601n5	Thoracic	mCherry	FMs	346.667	-208.69
170601n4	Thoracic	mCherry	FMs	348	-53.7805
170601n5	Thoracic	mCherry	FMs	348.13	-157.073
170601n4	Thoracic	mCherry	FMs	348.354	-253.175
170601n4	Thoracic	mCherry	FMs	350	-77.5568
170601n4	Thoracic	mCherry	FMs	350.968	104.943
170601n4	Thoracic	mCherry	FMs	351.678	104.398
170601n5	Thoracic	mCherry	FMs	351.852	-8.18182
170601n5	Thoracic	mCherry	FMs	352.318	62.3153
170601n5	Thoracic	mCherry	FMs	352.569	-214.516
170601n5	Thoracic	mCherry	FMs	352.874	317.581
170601n5	Thoracic	mCherry	FMs	352.998	-182.038
170601n4	Thoracic	mCherry	FMs	353.203	-76.087
170601n5	Thoracic	mCherry	FMs	353.846	169.541
170601n6	Thoracic	mCherry	FMs	353.917	170.69
170601n5	Thoracic	mCherry	FMs	354.209	161.121
170601n5	Thoracic	mCherry	FMs	354.967	7.43243
170601n5	Thoracic	mCherry	FMs	355.685	-15.9091
170601n4	Thoracic	mCherry	FMs	355.709	26.477
170601n5	Thoracic	mCherry	FMs	355.72	10.6681
170601n4	Thoracic	mCherry	FMs	355.741	146.429
170601n4	Thoracic	mCherry	FMs	356.044	-64.5312
170601n5	Thoracic	mCherry	FMs	356.825	-14.0374
170601n5	Thoracic	mCherry	FMs	357.143	-139.237
170601n5	Thoracic	mCherry	FMs	357.534	22.2222
170601n4	Thoracic	mCherry	FMs	357.966	-36.2426
170601n4	Thoracic	mCherry	FMs	360	-336.093
170601n4	Thoracic	mCherry	FMs	360.284	-16
170601n5	Thoracic	mCherry	FMs	361.589	-209.599
170601n4	Thoracic	mCherry	FMs	362.59	-44.5266
170601n5	Thoracic	mCherry	FMs	362.914	-108.309
170601n4	Thoracic	mCherry	FMs	363.291	-36.1111
170601n4	Thoracic	mCherry	FMs	364.045	132.715
170601n4	Thoracic	mCherry	FMs	365.468	-189.45
170601n5	Thoracic	mCherry	FMs	365.538	-18.5754
170601n4	Thoracic	mCherry	FMs	366.346	-84.5085
170601n5	Thoracic	mCherry	FMs	366.443	-33.6538
170601n5	Thoracic	mCherry	FMs	366.887	-6.96517
170601n4	Thoracic	mCherry	FMs	367.111	299.32
170601n5	Thoracic	mCherry	FMs	367.265	192.157
170601n4	Thoracic	mCherry	FMs	367.719	122.996
170601n4	Thoracic	mCherry	FMs	368.134	200.736
170601n6	Thoracic	mCherry	FMs	369.004	114.408
170601n5	Thoracic	mCherry	FMs	370.323	-31.6489
170601n4	Thoracic	mCherry	FMs	372.152	-44.8229
170601n4	Thoracic	mCherry	FMs	372.76	62.9956
170601n5	Thoracic	mCherry	FMs	373.145	30.5556
170601n4	Thoracic	mCherry	FMs	373.145	111.947
170601n5	Thoracic	mCherry	FMs	373.75	-7.79944
170601n4	Thoracic	mCherry	FMs	374.497	12.4294
170601n4	Thoracic	mCherry	FMs	374.51	118.891
170601n4	Thoracic	mCherry	FMs	375	-18.892
170601n5	Thoracic	mCherry	FMs	375.487	66.4959
170601n5	Thoracic	mCherry	FMs	376.25	294.945
170601n5	Thoracic	mCherry	FMs	376.654	-5.66038
170601n5	Thoracic	mCherry	FMs	377.843	162.279
170601n4	Thoracic	mCherry	FMs	377.855	213.02
170601n4	Thoracic	mCherry	FMs	378.182	-60.3801
170601n5	Thoracic	mCherry	FMs	378.275	7.52137
170601n5	Thoracic	mCherry	FMs	378.761	9.26966
170601n4	Thoracic	mCherry	FMs	380	157.494
170601n5	Thoracic	mCherry	FMs	380.781	6.7623
170601n4	Thoracic	mCherry	FMs	381.145	-28.8564
170601n5	Thoracic	mCherry	FMs	381.366	28.125
170601n5	Thoracic	mCherry	FMs	383.618	249.406
170601n5	Thoracic	mCherry	FMs	384.242	30.5026
170601n4	Thoracic	mCherry	FMs	386.486	-53.2394
170601n5	Thoracic	mCherry	FMs	386.532	232.731
170601n5	Thoracic	mCherry	FMs	387.379	297.347
170601n4	Thoracic	mCherry	FMs	388.462	106.374
170601n5	Thoracic	mCherry	FMs	388.991	28.0612
170601n5	Thoracic	mCherry	FMs	389.474	140.644
170601n5	Thoracic	mCherry	FMs	389.552	-247.059
170601n5	Thoracic	mCherry	FMs	389.625	45.2715
170601n4	Thoracic	mCherry	FMs	391.15	210.972
170601n4	Thoracic	mCherry	FMs	392.032	179.887
170601n4	Thoracic	mCherry	FMs	392.278	-173.469
170601n5	Thoracic	mCherry	FMs	393.528	7.17781
170601n4	Thoracic	mCherry	FMs	395.652	112.762
170601n5	Thoracic	mCherry	FMs	400	-169.182
170601n4	Thoracic	mCherry	FMs	401.856	196.763
170601n4	Thoracic	mCherry	FMs	404.38	-47.6839
170601n5	Thoracic	mCherry	FMs	404.954	72.1311
170601n4	Thoracic	mCherry	FMs	409.057	-43.2692
170601n4	Thoracic	mCherry	FMs	409.778	211.395
170601n4	Thoracic	mCherry	FMs	416.883	85.3009
170601n6	Thoracic	mCherry	FMs	420.717	208.621
170601n4	Thoracic	mCherry	FMs	435.842	129.177
170601n4	Thoracic	mCherry	FMs	435.862	151.603
170601n5	Thoracic	mCherry	FMs	438.75	172.857
170601n4	Thoracic	mCherry	FMs	447.337	140.426
170601n5	Thoracic	mCherry	FMs	450.564	232.908
170601n4	Thoracic	mCherry	FMs	452.9	168.654
170601n5	Thoracic	mCherry	FMs	459.394	192.548
170601n5	Thoracic	mCherry	FMs	463.291	161.499
170601n5	Thoracic	mCherry	FMs	470.857	254.1
170601n5	Thoracic	mCherry	FMs	474.336	189.469
170601n6	Thoracic	mCherry	FMs	479.443	220
170601n4	Thoracic	mCherry	FMs	487.417	160.976
170601n5	Thoracic	mCherry	FMs	482.209	225.717
170601n5	Lumbar	divergent	FMs+GS	-595.833	275.882
170623n5	Lumbar	divergent	FMs+GS	330.87	-156.237
170623n5	Lumbar	divergent	FMs+GS	-166.23	-159.74
170623n7	Lumbar	divergent	FMs+GS	-224.328	92.9134
170623n8	Lumbar	divergent	FMs+GS	-143.103	-71.875
170623n8	Lumbar	divergent	FMs+GS	499.02	148.137
170623n8	Lumbar	divergent	FMs+GS	-120.138	-122.917
170623n8	Lumbar	divergent	FMs+GS	535.726	120.509
170623n8	Lumbar	divergent	FMs+GS	565.081	186.704
170623n8	Lumbar	divergent	FMs+GS	591.691	87.2727
170601n5	Lumbar	mCherry	FMs	-174.275	-104.177
170601n5	Lumbar	mCherry	FMs	301.341	-81.5625
170601n5	Lumbar	mCherry	FMs	-212.892	-280.665
170601n5	Lumbar	mCherry	FMs	463.945	71.405
170601n5	Lumbar	mCherry	FMs	-170.211	-279.178
170601n5	Lumbar	mCherry	FMs	-269.416	-273.401
170601n5	Lumbar	mCherry	FMs	312.103	223.907
170601n5	Lumbar	mCherry	FMs	480.925	91.1854
170601n5	Lumbar	mCherry	FMs	108.974	4.39239
170601n5	Lumbar	mCherry	FMs	435.944	120.715
170601n5	Lumbar	mCherry	FMs	-134.483	124
170601n5	Lumbar	mCherry	FMs	-257.715	-305.707
170601n5	Lumbar	mCherry	FMs	-195.267	-214.69
170601n5	Lumbar	mCherry	FMs	-371.627	-352.059
170601n5	Lumbar	mCherry	FMs	-203.212	-333.529
170601n4	Lumbar	mCherry	FMs	499.587	132.389
170601n4	Lumbar	mCherry	FMs	-233.164	-312.766
170601n4	Lumbar	mCherry	FMs	-18.932	42.7606
170601n4	Lumbar	mCherry	FMs	-203.125	-289.813
170601n4	Lumbar	mCherry	FMs	-211.98	-288.55
170601n4	Lumbar	mCherry	FMs	170.492	71.5549
170601n4	Lumbar	mCherry	FMs	367.897	42.3077
170601n4	Lumbar	mCherry	FMs	229.754	10.3419
170601n4	Lumbar	mCherry	FMs	-234.653	-316.667
170601n4	Lumbar	mCherry	FMs	221.414	44.4413
170601n4	Lumbar	mCherry	FMs	-227.684	-258.129
170623n5	Lumbar	mCherry	FMs	-254.787	-286.364
170623n5	Lumbar	mCherry	FMs	-147.727	-123.701
170623n5	Lumbar	mCherry	FMs	-490.982	-80.137
170623n5	Lumbar	mCherry	FMs	-265.963	-296.624
170623n5	Lumbar	mCherry	FMs	-219.718	-260.393
170623n5	Lumbar	mCherry	FMs	296.304	25.2374
170623n5	Lumbar	mCherry	FMs	-241.466	-250.114
170601n6	Lumbar	mCherry	FMs	618.447	44.4944
170601n6	Lumbar	mCherry	FMs	-357.285	-197.626
170601n6	Lumbar	mCherry	FMs	415.766	-67.688
170601n6	Lumbar	mCherry	FMs	-172.961	-306.704
170601n6	Lumbar	mCherry	FMs	317.512	26.501
170601n6	Lumbar	mCherry	FMs	-160.588	-224.286
170623n7	Lumbar	mCherry	FMs	-227.922	274.212
170623n7	Lumbar	mCherry	FMs	29.3233	20.7254
170623n7	Lumbar	mCherry	FMs	575.25	91.9708
170623n7	Lumbar	mCherry	FMs	-610.519	210.435
170623n7	Lumbar	mCherry	FMs	164.519	-155.282
170623n7	Lumbar	mCherry	FMs	-95.5574	14.5946
170623n7	Lumbar	mCherry	FMs	231.408	39.9351
170623n7	Lumbar	mCherry	FMs	-182.846	-266.992
170623n7	Lumbar	mCherry	FMs	574.252	88.0645
170623n7	Lumbar	mCherry	FMs	522.508	82.314
170623n7	Lumbar	mCherry	FMs	-416.637	328.191
170623n7	Lumbar	mCherry	FMs	-247.355	-241.908
170623n7	Lumbar	mCherry	FMs	554.983	196.188
170623n8	Lumbar	mCherry	FMs	197.864	-99.878
170623n8	Lumbar	mCherry	FMs	80.531	-4.18605
170623n8	Lumbar	mCherry	FMs	236.916	-224.089
170623n8	Lumbar	mCherry	FMs	-224.043	-307.241
170623n8	Lumbar	mCherry	FMs	-166.574	-263.077
170623n8	Lumbar	mCherry	FMs	68.9082	-47.9087
170623n8	Lumbar	mCherry	FMs	81.8979	32.3353
170623n8	Lumbar	mCherry	FMs	540.994	161.337
170623n8	Lumbar	mCherry	FMs	264.37	137.273
170623n8	Lumbar	mCherry	FMs	318.488	40.6299
170623n8	Lumbar	mCherry	FMs	184.699	277.795
170623n8	Lumbar	mCherry	FMs	177.768	-22.9124
170623n8	Lumbar	mCherry	FMs	643	68.5714
170623n8	Lumbar	mCherry	FMs	619.097	26.4036
170623n8	Lumbar	mCherry	FMs	-138.043	35.6436
170623n8	Lumbar	mCherry	FMs	-379.348	-154.953
170623n8	Lumbar	mCherry	FMs	529.808	54.4601
170623n8	Lumbar	mCherry	FMs	-386.672	-127.335
170623n8	Lumbar	mCherry	FMs	204.007	17.3765
170623n8	Lumbar	mCherry	FMs	522.203	90.4977
170623n8	Lumbar	mCherry	FMs	607.034	65.4867
170623n8	Lumbar	mCherry	FMs	205.724	38.9381
170623n8	Lumbar	mCherry	FMs	538.003	178.52
170623n8	Lumbar	mCherry	FMs	550.564	126.27
170623n8	Lumbar	mCherry	FMs	453.13	116.54
170623n8	Lumbar	mCherry	FMs	585.106	135.569
170623n8	Lumbar	mCherry	FMs	-263.594	-44.4706
170623n8	Lumbar	mCherry	FMs	-210.676	-290.118
170623n8	Lumbar	mCherry	FMs	546.977	193.722
170623n8	Lumbar	mCherry	FMs	-27.7439	51.2315
170623n8	Lumbar	mCherry	FMs	16.3265	89.4356
170623n8	Lumbar	mCherry	FMs	175.51	-5.22042
170623n8	Lumbar	mCherry	FMs	-231.871	-317.018
170623n8	Lumbar	mCherry	FMs	-248.828	-306
170623n8	Lumbar	mCherry	FMs	-339.009	-381.646
170623n8	Lumbar	mCherry	FMs	587.898	80.8803
170623n8	Lumbar	mCherry	FMs	146	-40.3148
170623n8	Lumbar	mCherry	FMs	484.527	137.705
170623n8	Lumbar	mCherry	FMs	-223.624	-337.772
170623n8	Lumbar	mCherry	FMs	529.341	117.597
170623n8	Lumbar	mCherry	FMs	168.159	77.4725
170623n8	Lumbar	mCherry	FMs	472.647	206.358
170623n8	Lumbar	mCherry	FMs	166.712	90.1734
170623n8	Lumbar	mCherry	FMs	-82.0217	66.2139
170623n8	Lumbar	mCherry	FMs	182.574	45.3147
170623n8	Lumbar	mCherry	FMs	402.336	46.8208
170623n8	Lumbar	mCherry	FMs	513.358	100.578
170623n8	Lumbar	mCherry	FMs	511.46	123.988
170623n8	Lumbar	mCherry	FMs	582.628	115.318
170623n8	Lumbar	mCherry	FMs	194.898	23.431
170623n8	Lumbar	mCherry	FMs	128.571	56.0669
170623n8	Lumbar	mCherry	FMs	-202.148	-270.981
170623n8	Lumbar	mCherry	FMs	486.125	199.156
170623n8	Lumbar	mCherry	FMs	-283.83	-291.853
170623n8	Lumbar	mCherry	FMs	448.71	151.464
170623n8	Sacral	divergent	FMs+GS	-378.571	-280.826
170623n8	Sacral	divergent	FMs+GS	-385.393	-283.544
170623n8	Sacral	divergent	FMs+GS	-151.033	-0.952381
170623n8	Sacral	mCherry	FMs	-106.502	-13.0653
170623n8	Sacral	mCherry	FMs	-230.994	-227.273
170623n8	Sacral	mCherry	FMs	-169.591	-212.5
170623n8	Sacral	mCherry	FMs	115.385	-125.45
170623n7	Sacral	mCherry	FMs	-340.149	-167.711
170623n7	Sacral	mCherry	FMs	-478.522	202.024
170601n5	Sacral	mCherry	FMs	-184.389	-56.8365
170601n4	Sacral	mCherry	FMs	-248.634	-88.0829
170601n4	Sacral	mCherry	FMs	-171.56	-116.514

## Sheet: Figure 6-figure supp 2G
Divergent neuron cross-sectional area (𝜇m)	Labelling	Sacral
	divergent	488
	divergent	1008
	divergent	733
	mCherry	559
	mCherry	178
	mCherry	586
	mCherry	490
	mCherry	1039
	mCherry	226
	mCherry	621
	mCherry	1329
	mCherry	728
