# Supplementary material for: Proximal and distal spinal neurons innervating multiple synergist and antagonist motor pools
Source: eLife. 2021 Nov 2;10:e70858. doi: 10.7554/eLife.70858 (PMC8631798; doi:10.7554/eLife.70858)
Supplement: Figure 6—source data 1. [file elife-70858-fig6-data1.xlsx]

## Sheet: Feuil1
Sample	Part of Spinal Cord	labelling	Muscles	Medio_Lateral	Dorso_Ventral
170623n8	Cervical	divergent	FMs+GS	-339.116	-157.952
170601n4	Cervical	divergent	FMs+GS	-312.326	-272.596
170623n8	Cervical	divergent	FMs+GS	-262.643	-124.602
170601n5	Cervical	divergent	FMs+GS	-228.235	-236.725
170623n8	Cervical	divergent	FMs+GS	-150.938	-61.6137
170601n5	Cervical	divergent	FMs+GS	-150.169	-182.403
170623n8	Cervical	divergent	FMs+GS	147.134	-76.1673
170623n8	Cervical	divergent	FMs+GS	482.946	-45
170601n6	Cervical	divergent	FMs+GS	564.368	-65.1015
170601n5	Cervical	divergent	FMs+GS	-348.223	-96.1664
170601n5	Cervical	divergent	FMs+GS	-318.657	-270.724
170601n5	Cervical	divergent	FMs+GS	-304.95	-190.5
170601n5	Cervical	divergent	FMs+GS	-263.05	-214.286
170601n5	Cervical	divergent	FMs+GS	-257.009	-174.39
170601n5	Cervical	divergent	FMs+GS	336.158	-121.492
170601n5	Cervical	divergent	FMs+GS	485.088	-168.923
170601n5	Cervical	eGFP	GS	-366.185	-2.22772
170601n5	Cervical	eGFP	GS	-365.165	-199.804
170601n5	Cervical	eGFP	GS	-347.853	-197.688
170601n6	Cervical	eGFP	GS	-345.798	-296.296
170601n6	Cervical	eGFP	GS	-339.845	-302.49
170623n8	Cervical	eGFP	GS	-322.549	-235.931
170601n5	Cervical	eGFP	GS	-311.353	-230.294
170623n8	Cervical	eGFP	GS	-307.508	-307.435
170623n7	Cervical	eGFP	GS	-291.566	-167.332
170601n6	Cervical	eGFP	GS	-284.016	-249.58
170601n4	Cervical	eGFP	GS	-281.594	-174.316
170623n7	Cervical	eGFP	GS	-279.795	-270.841
170601n5	Cervical	eGFP	GS	-279.054	-166.667
170601n6	Cervical	eGFP	GS	-276.812	-219.162
170623n8	Cervical	eGFP	GS	-272.586	-170.319
170601n6	Cervical	eGFP	GS	-272.483	-233.133
170623n7	Cervical	eGFP	GS	-269.906	-265.979
170623n7	Cervical	eGFP	GS	-268.509	-303
170601n4	Cervical	eGFP	GS	-255.493	-262.015
170601n5	Cervical	eGFP	GS	-255.1	-254.082
170623n8	Cervical	eGFP	GS	-254.8	-136.607
170623n7	Cervical	eGFP	GS	-254.646	-252.321
170601n4	Cervical	eGFP	GS	-248.346	-242.442
170623n7	Cervical	eGFP	GS	-243.664	-180.938
170601n5	Cervical	eGFP	GS	-239.591	-173.214
170623n7	Cervical	eGFP	GS	-232.65	-174.112
170601n5	Cervical	eGFP	GS	-219.686	-96.3576
170601n5	Cervical	eGFP	GS	-216.26	-246.226
170601n4	Cervical	eGFP	GS	-211.858	-225.455
170601n5	Cervical	eGFP	GS	-210.334	-112.996
170601n5	Cervical	eGFP	GS	-207.407	-275.78
170623n7	Cervical	eGFP	GS	-200	-165.97
170601n5	Cervical	eGFP	GS	-194.194	-222.426
170623n7	Cervical	eGFP	GS	-190.078	-74.8497
170623n8	Cervical	eGFP	GS	-180.245	-253.922
170601n5	Cervical	eGFP	GS	-176.281	-254.297
170601n6	Cervical	eGFP	GS	-174.382	-250.588
170623n8	Cervical	eGFP	GS	-171.755	-167.286
170601n5	Cervical	eGFP	GS	-162.767	-244.068
170601n4	Cervical	eGFP	GS	-160.113	-211.168
170623n7	Cervical	eGFP	GS	-154.22	-116.482
170623n7	Cervical	eGFP	GS	-146.939	-172.5
170601n5	Cervical	eGFP	GS	-143.158	-152.344
170623n7	Cervical	eGFP	GS	-136.458	-145.616
170623n7	Cervical	eGFP	GS	-130.616	-226.353
170623n8	Cervical	eGFP	GS	-120.065	-110.625
170623n7	Cervical	eGFP	GS	-74.4012	-38.5714
170601n5	Cervical	eGFP	GS	-57.3171	-73.6364
170601n5	Cervical	eGFP	GS	-54.1935	-71.0526
170601n6	Cervical	eGFP	GS	-40.885	-85.6695
170601n5	Cervical	eGFP	GS	99.4688	-16.5944
170623n7	Cervical	eGFP	GS	140.186	-75.5245
170601n6	Cervical	eGFP	GS	177.138	-207.159
170623n7	Cervical	eGFP	GS	346.178	-147.749
170623n7	Cervical	eGFP	GS	374.579	-117.722
170623n8	Cervical	eGFP	GS	419.455	0
170601n5	Cervical	eGFP	GS	439.865	-203.968
170601n5	Cervical	eGFP	GS	449.778	290.179
170623n8	Cervical	eGFP	GS	454.079	-226.807
170623n8	Cervical	eGFP	GS	476.152	-353.944
170601n5	Cervical	eGFP	GS	478.889	-35.9589
170623n7	Cervical	eGFP	GS	483.721	150.956
170623n8	Cervical	eGFP	GS	618.627	195.271
170601n5	Cervical	eGFP	GS	762.481	190.42
