# Supplementary material for: Proximal and distal spinal neurons innervating multiple synergist and antagonist motor pools
Source: eLife. 2021 Nov 2;10:e70858. doi: 10.7554/eLife.70858 (PMC8631798; doi:10.7554/eLife.70858)
Supplement: Supplementary file 1. — Distribution of divergent premotor neurons per region of the spinal cord across individual experiments, expressed as median± first/third quartile. [file elife-70858-supp1.xlsx]

## Sheet: Supplementary file 1
Sample	Muscles injected	Lumbar								Thoracic					Cervical
		MNs			INs			Distributions divergent INs		INs			Distributions divergent neurons		INs			Distributions divergent neurons
		Muscle 1	Muscle 2	Double labelled		Muscle 2	Double labelled	Medio-Lateral (in 𝛍m)	Dorso-Ventral (in 𝛍m)	Muscle 1	Muscle 2	Double labelled	Medio-Lateral (in 𝛍m)	Dorso-Ventral (in 𝛍m)	Muscle 1	Muscle 2	Double labelled	Medio-Lateral (in 𝛍m)	Dorso-Ventral (in 𝛍m)
170125n3	LG - MG	39	39	0	547	736	48	323 ± 95/400	22 ± -191/209	22	90	14	147 ± -66/300	-7 ± -128/177	4	4	4	-180 ± -269/168	-251 ± -271/-159
170508n7	LG - MG	107	64	3	1547	1285	103	357 ± 127/474	30 ± -157/148	77	46	25	258 ± -124/289	0 ± -121/167	7	7	5	-273 ± -301/-265	-305 ± -317/-264
170125n7	PL - TA	39	47	0	887	751	60	307 ± 112/396	60 ± -82/169	45	19	20	111 ± -222/316	60 ± -96/197	6	7	7	-234 ± -298/-152	-255 ± -264/-225
170125n8	PL - TA	20	20	2	673	893	65	275 ± 140/396	42 ± -34/150	37	83	18	335 ± 294/376	169 ± 73/205	0	1	3	-266 ± -296/-239	-221 ± -237/-206
﻿170427n2	LG - TA	44	39	1	501	585	52	284 ± 164/385	101 ± -14/206	31	69	9	272 ± -186/333	2 ± -126/108	2	1	3	-221 ± -226/-195	-245 ± -270/-125
170427n3	LG - TA	32	6	0	464	264	29	293 ± 160/386	56 ± -128/152	33	15	5	305 ± 243/349	98 ± 14/166	1	2	2	-245 ± -284/-206	-249 ± -285/-214
170503n6	LG - TA	83	55	0	1490	1243	125	284 ± 102/397	86 ± -89/191	103	91	45	275 ± 86/312	167 ± -45/193	8	4	14	-169 ± -228/247	-225 ± -266/-187
