# Supplementary material for: Proximal and distal spinal neurons innervating multiple synergist and antagonist motor pools
Source: eLife. 2021 Nov 2;10:e70858. doi: 10.7554/eLife.70858 (PMC8631798; doi:10.7554/eLife.70858)
Supplement: Supplementary file 2. — (+) means that a fluorescent signal was found in muscle fibres, (−) means that no fluorescence was observed following muscle dissections. [file elife-70858-supp2.xlsx]

## Sheet: Supplementary file 2
	Type of injection	Extensor carpi radialis longus	Extensor carpi radialis brevis	Flexor carpi radialis	Extensor carpi ulnaris	Flexor carpi ulnaris	Palmaris longus	Digitorum profundus
Sample
S_4_0106	homolateral	-	-	-	-	-	-	-
S_5_0106	homolateral	-	+	-	-	+	-	-
S_6_0106	homolateral	-	+	-	+	+	-	-
S_5_2306	homolateral	+	+	-	+	+	-	-
S_7_2306	homolateral	+	+	+	-	+	+	+
S_8_2306	homolateral	+	+	-	-	+	-	-
S_7_0106	contralateral	-	-	-	-	+	-	-
S_8_0106	contralateral	+	+	-	+	+	-	-
S_10_0106	contralateral	+	+	-	-	+	-	-
