# Supplementary material for: Proximal and distal spinal neurons innervating multiple synergist and antagonist motor pools
Source: eLife. 2021 Nov 2;10:e70858. doi: 10.7554/eLife.70858 (PMC8631798; doi:10.7554/eLife.70858)
Supplement: Supplementary file 3. [file elife-70858-supp3.xlsx]

## Sheet: Supplementary file 1
Figures in which samples are used	Mouse strain	Muscles injected	Number of animals	Used for
1, 2, 3	ChAT-IRES-Cre; RΦGT	LG, MG	2	This study; Ronzano et al, 2021
1, 2, 3	ChAT-IRES-Cre; RΦGT	TA, PL	2	This study; Ronzano et al, 2021
1, 2, 3	ChAT-IRES-Cre; RΦGT	TA, LG	3	This study; Ronzano et al, 2021
4	ChAT-IRES-Cre; RΦGT; GlyT2-eGFP	LG	3	This study only
5	ChAT-IRES-Cre; RΦGT	LG+MG	4	This study only
6 , 1-supplement 6	ChAT-IRES-Cre; RΦGT	LG+MG, FMs homolateral	6	This study only
1-supplement 4	ChAT-IRES-Cre; RΦGT	LG+MG, FMs contralateral	3	This study only
1-supplement 5	ChAT-IRES-Cre; RΦGT	TA	1	This study only
